# Supplementary material for: The role of attractive and repulsive interactions in the stabilization of ammonium salts structures
Source: Royal Society of Chemistry journal article supplement (doi:10.1039/d2ce00891b), 2022-01-01
Supplement: d2ce00891b1.pdf [file d2ce00891b1.pdf]

## SUPPORTING INFORMATION

### The Role of Attractive and Repulsive Interactions in the Stabilization of Ammonium Salts Structures

Gustavo H. Weimer<sup>1</sup>, João P. P. Copetti<sup>1</sup>, Tainára Orlando<sup>2</sup>, Nilo Zanatta<sup>1</sup>,  
Helio G. Bonacorso<sup>1</sup>, Paulo R. S. Salbego<sup>3\*</sup>, and Marcos A. P. Martins<sup>1\*</sup>

<sup>1</sup>Núcleo de Química de Heterociclos (NUQUIMHE), Department of Chemistry, Federal  
University of Santa Maria (UFSM), Santa Maria, RS, Brazil.

<sup>2</sup>Department of Chemistry, Federal University of Maranhão (UFMA), São Luís, MA,  
Brazil.

<sup>3</sup>Núcleo de Química de Heterociclos (NUQUIMHE), Department of Engineering and  
Environmental Technology (DETA), Federal University of Santa Maria (UFSM),  
Frederico Westphalen *Campus*, RS, Brazil.

*\*E-mail: paulosalbego@gmail.com, marcos.nuquimhe@gmail.com*

|                                                                                                         |    |
|---------------------------------------------------------------------------------------------------------|----|
| 1. Symmetry Codes, Contact Area, Stabilization and Destabilization Energies and<br>Normalized Data..... | 2  |
| 2. Normalized Data .....                                                                                | 40 |
| 3. Molecular Electrostatic Potential (MEP) .....                                                        | 44 |
| 4. Crystallization Mechanisms .....                                                                     | 45 |
| 5. Basis Set Comparison .....                                                                           | 51 |

## 1. Symmetry Codes, Contact Area, Stabilization and Destabilization Energies and Normalized Data

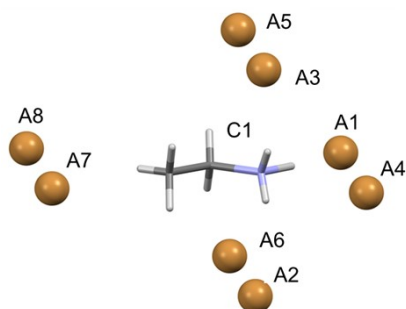

Figure S1. Anions that present contact area with C1 cation of salt **1a**.

Table S1. Symmetry codes, contact area, absolute stabilization energies and N...X distances of each C1...A pair of salt **1a**.

| C1...A  | Anion symmetry code <sup>a</sup> | C <sub>C1...A</sub> <sup>b</sup> | G <sub>C1...A</sub> <sup>c</sup> | G <sub>C1...A1</sub> - G <sub>C1...A</sub>   <sup>d</sup> | N...X <sup>e</sup> |
|---------|----------------------------------|----------------------------------|----------------------------------|-----------------------------------------------------------|--------------------|
| C1...A1 | 1-x,-1/2+y,2-z                   | 6.15                             | -1700358.03                      | 0.00                                                      | 3.35               |
| C1...A2 | x,-1+y,z                         | 7.24                             | -1700339.84                      | 18.19                                                     | 3.38               |
| C1...A3 | x,y,z                            | 7.24                             | -1700339.84                      | 18.19                                                     | 3.38               |
| C1...A4 | -x,-1/2+y,2-z                    | 6.87                             | -1700335.21                      | 22.82                                                     | 3.41               |
| C1...A5 | 1+x,y,z                          | 3.23                             | -1700316.90                      | 41.13                                                     | 4.60               |
| C1...A6 | 1+x,-1+y,z                       | 3.23                             | -1700316.90                      | 41.13                                                     | 4.60               |
| C1...A7 | -x,-1/2+y,1-z                    | 3.47                             | -1700299.50                      | 58.53                                                     | 6.17               |
| C1...A8 | 1-x,-1/2+y,1-z                   | 2.52                             | -1700297.78                      | 60.25                                                     | 6.45               |

<sup>a</sup>Cation C1 symmetry code:  $x,y,z$ . <sup>b</sup>Contact area between C1 and each considered anion, in Å<sup>2</sup>. <sup>c</sup>Absolute energy of each C1...A pair, in a.u.; <sup>d</sup>Difference of absolute energies between the most stable pair and each considered pair, in kcal mol<sup>-1</sup>. <sup>e</sup>Distance, in Å.

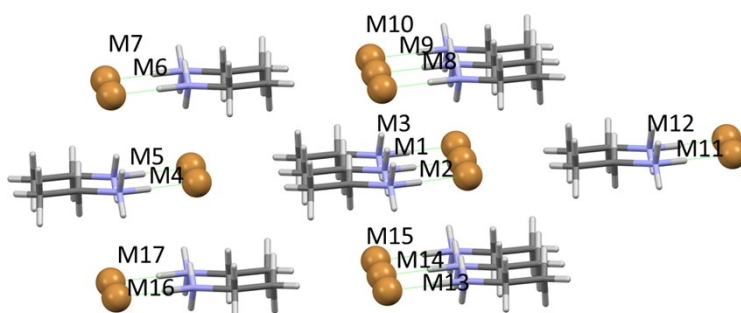

Figure S2. Supramolecular cluster of salt **1a**.

Table S2. Symmetry codes, contact area ( $C_{M1...MN}$ , in  $\text{\AA}^2$ ) and energetic data ( $G_{M1...MN}$ , in  $\text{kcal mol}^{-1}$ ) for the supramolecular cluster of salt **1a**.

| Dimer    | Cation symmetry code | Anion symmetry code | $C_{M1...MN}$ | $G_{M1...MN}$ | $NC_{M1...MN}$ | $NG_{M1...MN}$ |
|----------|----------------------|---------------------|---------------|---------------|----------------|----------------|
| M1       | x,y,z                | 1-x,-0.5+y,2-z      |               |               |                |                |
| M1...M2  | -1+x,y,z             | -x,-0.5+y,2-z       | 19.53         | -1.03         | 2.03           | 0.16           |
| M1...M3  | 1+x,y,z              | 2-x,-0.5+y,2-z      | 19.53         | -1.03         | 2.03           | 0.16           |
| M1...M4  | -1+x,y,-1+z          | -x,-0.5+y,1-z       | 3.47          | -5.09         | 0.36           | 0.82           |
| M1...M5  | x,y,-1+z             | 1-x,-0.5+y,1-z      | 2.7           | -2.99         | 0.28           | 0.48           |
| M1...M6  | -x,0.5+y,1-z         | -1+x,y,-1+z         | 5.21          | 2.69          | 0.54           | -0.43          |
| M1...M7  | 1-x,0.5+y,1-z        | x,y,-1+z            | 15.48         | 1.03          | 1.61           | -0.16          |
| M1...M8  | -x,0.5+y,2-z         | -1+x,y,z            | 0.61          | -1.87         | 0.06           | 0.30           |
| M1...M9  | 1-x,0.5+y,2-z        | x,y,z               | 23.65         | -33.36        | 2.45           | 5.34           |
| M1...M10 | 2-x,0.5+y,2-z        | 1+x,y,z             | 6.47          | -9.36         | 0.67           | 1.50           |
| M1...M11 | x,y,1+z              | 1-x,-0.5+y,3-z      | 2.70          | -2.99         | 0.28           | 0.48           |
| M1...M12 | 1+x,y,1+z            | 2-x,-0.5+y,3-z      | 3.47          | -5.09         | 0.36           | 0.82           |
| M1...M13 | -x,-0.5+y,2-z        | -1+x,-1+y,z         | 0.61          | -1.87         | 0.06           | 0.30           |
| M1...M14 | 1-x,-0.5+y,2-z       | x,-1+y,z            | 23.65         | -33.36        | 2.45           | 5.34           |
| M1...M15 | 2-x,-0.5+y,2-z       | 1+x,-1+y,z          | 6.47          | -9.36         | 0.67           | 1.50           |
| M1...M16 | -x,-0.5+y,1-z        | -1+x,-1+y,-1+z      | 5.21          | 2.69          | 0.54           | -0.43          |
| M1...M17 | 1-x,-0.5+y,1-z       | x,-1+y,-1+z         | 15.48         | 1.03          | 1.61           | -0.16          |
| Total    |                      |                     | 154.24        | -99.97        | 16.00          | 16.00          |

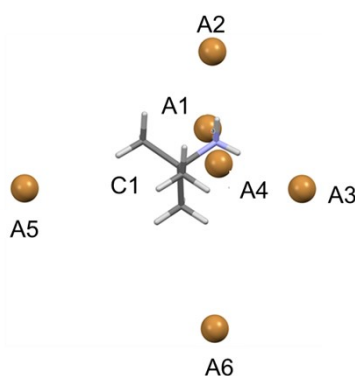

Figure S3. Anions that present contact area with C1 cation of salt **2a**.

Table S3. Symmetry codes, contact area, absolute stabilization energies and  $N...X$  distances of each  $C1...A$  pair of salt **2a**.

| $C1...A$  | Anion symmetry code <sup>a</sup> | $C_{C1...A}$ <sup>b</sup> | $G_{C1...A}$ <sup>c</sup> | $ G_{C1...A1} - G_{C1...A} $ <sup>d</sup> | $N...X$ <sup>e</sup> |
|-----------|----------------------------------|---------------------------|---------------------------|-------------------------------------------|----------------------|
| $C1...A1$ | x,y,z                            | 11.21                     | -1749697.49               | 0.00                                      | 3.36                 |
| $C1...A2$ | 1/2-x,-1/2+y,z                   | 10.34                     | -1749693.94               | 3.55                                      | 3.34                 |
| $C1...A3$ | 1-x,-1/2+y,1.5-z                 | 9.89                      | -1749692.77               | 4.72                                      | 3.33                 |
| $C1...A4$ | x,-1+y,z                         | 4.41                      | -1749655.10               | 42.39                                     | 5.66                 |
| $C1...A5$ | 1-x,1-y,1-z                      | 3.89                      | -1749653.44               | 44.05                                     | 6.49                 |
| $C1...A6$ | 1.5-x,-1/2+y,z                   | 2.80                      | -1749651.87               | 45.62                                     | 6.13                 |

<sup>a</sup>Cation C1 symmetry code: x,y,z. <sup>b</sup>Contact area between C1 and each considered anion, in  $\text{\AA}^2$ . <sup>c</sup>Absolute energy of each  $C1...A$  pair, in a.u.; <sup>d</sup>Difference of absolute energies between the most stable pair and each considered pair, in  $\text{kcal mol}^{-1}$ . <sup>e</sup>Distance, in  $\text{\AA}$ .

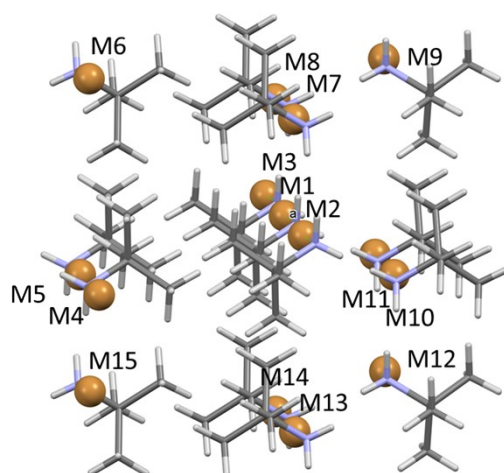

Figure S4. Supramolecular cluster of salt **2a**.

Table S4. Symmetry codes, contact area ( $C_{M1...MN}$ , in  $\text{\AA}^2$ ) and energetic data ( $G_{M1...MN}$ , in  $\text{kcal mol}^{-1}$ ) for the supramolecular cluster of salt **2a**.

| Dimer    | Cation symmetry code | Anion symmetry code | $C_{M1...MN}$ | $G_{M1...MN}$ | $NC_{M1...MN}$ | $NG_{M1...MN}$ |
|----------|----------------------|---------------------|---------------|---------------|----------------|----------------|
| M1       | x,y,z                | x,y,z               |               |               |                |                |
| M1...M2  | x,-1+y,z             | x,-1+y,z            | 4.41          | -6.86         | 0.32           | 1.56           |
| M1...M3  | x,1+y,z              | x,1+y,z             | 4.41          | -6.86         | 0.32           | 1.56           |
| M1...M4  | 1-x,-y,1-z           | 1-x,-y,1-z          | 12.13         | 1.35          | 0.87           | -0.31          |
| M1...M5  | 1-x,1-y,1-z          | 1-x,1-y,1-z         | 25.46         | -13.46        | 1.82           | 3.06           |
| M1...M6  | -1/2+x,1/2-y,1-z     | -1/2+x,1/2-y,1-z    | 12.8          | -1.97         | 0.92           | 0.45           |
| M1...M7  | 1/2-x,-1/2+y,z       | 1/2-x,-1/2+y,z      | 20.37         | -12.42        | 1.46           | 2.82           |
| M1...M8  | 1/2-x,1/2+y,z        | 1/2-x,1/2+y,z       | 20.37         | -12.42        | 1.46           | 2.82           |
| M1...M9  | -1/2+x,y,1.5-z       | -1/2+x,y,1.5-z      | 7.42          | 9.81          | 0.53           | -2.23          |
| M1...M10 | 1-x,-1/2+y,1.5-z     | 1-x,-1/2+y,1.5-z    | 17.28         | -12.03        | 1.24           | 2.73           |
| M1...M11 | 1-x,1/2+y,1.5-z      | 1-x,1/2+y,1.5-z     | 17.28         | -12.03        | 1.24           | 2.73           |
| M1...M12 | 1/2+x,y,1.5-z        | 1/2+x,y,1.5-z       | 7.42          | 9.81          | 0.53           | -2.23          |
| M1...M13 | 1.5-x,-1/2+y,z       | 1.5-x,-1/2+y,z      | 16.83         | -1.28         | 1.20           | 0.29           |
| M1...M14 | 1.5-x,1/2+y,z        | 1.5-x,1/2+y,z       | 16.83         | -1.28         | 1.20           | 0.29           |
| M1...M15 | 1/2+x,1/2-y,1-z      | 1/2+x,1/2-y,1-z     | 12.8          | -1.97         | 0.92           | 0.45           |
| Total    |                      |                     | 195.81        | -61.61        | 14.00          | 14.00          |

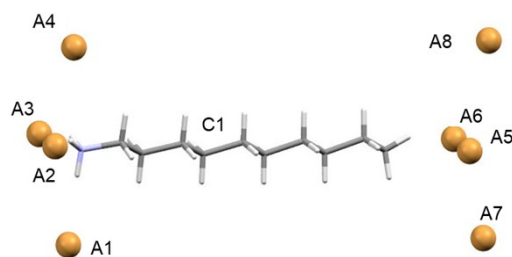

Figure S5. Anions that present contact area with C1 cation of salt **3a**.

Table S5. Symmetry codes, contact area, absolute stabilization energies and N...X distances of each C1...A pair of salt **3a**.

| C1...A  | Anion symmetry code <sup>a</sup> | C <sub>C1...A</sub> <sup>b</sup> | G <sub>C1...A</sub> <sup>c</sup> | G <sub>C1...A1</sub> - G <sub>C1...A</sub>   <sup>d</sup> | N...X <sup>e</sup> |
|---------|----------------------------------|----------------------------------|----------------------------------|-----------------------------------------------------------|--------------------|
| C1...A1 | 1-x,-y,1-z                       | 8.97                             | -1897578.12                      | 0.00                                                      | 3.38               |
| C1...A2 | 1+x,y,z                          | 8.02                             | -1897577.99                      | 0.14                                                      | 3.30               |
| C1...A3 | x,y,z                            | 9.8                              | -1897577.49                      | 0.63                                                      | 3.35               |
| C1...A4 | 1-x,1-y,1-z                      | 8.95                             | -1897570.55                      | 7.57                                                      | 3.58               |
| C1...A5 | x,1/2-y,-1/2+z                   | 3.89                             | -1897504.91                      | 73.21                                                     | 14.48              |
| C1...A6 | -1+x,1/2-y,-1/2+z                | 2.74                             | -1897499.78                      | 78.34                                                     | 16.62              |
| C1...A7 | -x,-1/2+y,1/2-z                  | 1.17                             | -1897499.62                      | 78.51                                                     | 16.46              |
| C1...A8 | -x,1/2+y,1/2-z                   | 0.04                             | -1897499.18                      | 78.95                                                     | 16.59              |

<sup>a</sup>Cation C1 symmetry code: x,y,z. <sup>b</sup>Contact area between C1 and each considered anion, in Å<sup>2</sup>. <sup>c</sup>Absolute energy of each C1...A pair, in a.u.; <sup>d</sup>Difference of absolute energies between the most stable pair and each considered pair, in kcal mol<sup>-1</sup>. <sup>e</sup>Distance, in Å.

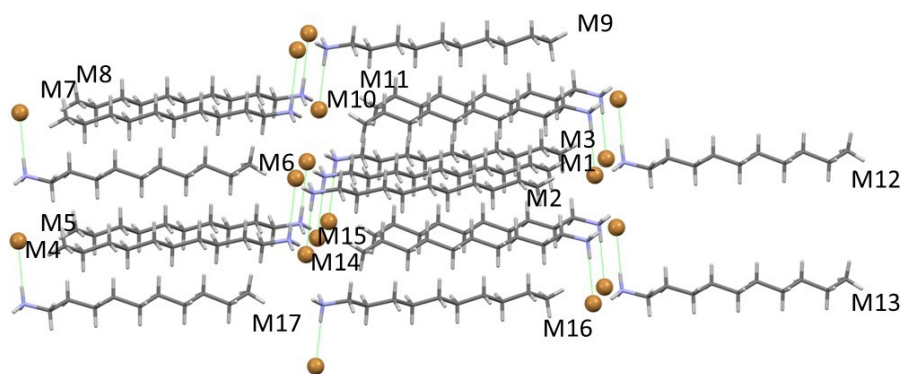

Figure S6. Supramolecular cluster of **3a**.

Table S6. Symmetry codes, contact area (C<sub>M1...MN</sub>, in Å<sup>2</sup>) and energetic data (G<sub>M1...MN</sub>, in kcal mol<sup>-1</sup>) for the supramolecular cluster of salt **3a**.

| Dimer    | Cation symmetry code | Anion symmetry code | C <sub>M1...MN</sub> | G <sub>M1...MN</sub> | NC <sub>M1...MN</sub> | NG <sub>M1...MN</sub> |
|----------|----------------------|---------------------|----------------------|----------------------|-----------------------|-----------------------|
| M1       | x,y,z                | 1-x,-y,1-z          |                      |                      |                       |                       |
| M1...M2  | 1+x,y,z              | 2-x,-y,1-z          | 18.03                | 5.89                 | 0.83                  | -0.67                 |
| M1...M3  | -1+x,y,z             | -x,-y,1-z           | 18.03                | 5.89                 | 0.83                  | -0.67                 |
| M1...M4  | 2-x,-y,1-z           | 1+x,y,z             | 19.93                | -47.63               | 0.92                  | 5.43                  |
| M1...M5  | 1-x,-y,1-z           | x,y,z               | 22.67                | -46.29               | 1.05                  | 5.28                  |
| M1...M6  | 1+x,1/2-y,1/2+z      | 2-x,1/2+y,1.5-z     | 10.29                | -1.64                | 0.48                  | 0.19                  |
| M1...M7  | 2-x,1-y,1-z          | 1+x,1+y,z           | 2.69                 | 5.41                 | 0.12                  | -0.62                 |
| M1...M8  | 1-x,1-y,1-z          | x,1+y,z             | 1.83                 | 4.16                 | 0.08                  | -0.47                 |
| M1...M9  | x,1+y,z              | 1-x,1-y,1-z         | 8.95                 | -18.06               | 0.41                  | 2.06                  |
| M1...M10 | 1-x,1/2+y,1/2-z      | x,1/2-y,-1/2+z      | 57.27                | -7.28                | 2.65                  | 0.83                  |
| M1...M11 | -x,1/2+y,1/2-z       | -1+x,1/2-y,-1/2+z   | 53.89                | -6.02                | 2.49                  | 0.69                  |
| M1...M12 | -1+x,1/2-y,-1/2+z    | -x,1/2+y,1/2-z      | 10.25                | -1.64                | 0.47                  | 0.19                  |
| M1...M13 | -1+x,-1/2-y,-1/2+z   | -x,-1/2+y,1/2-z     | 1.17                 | -0.89                | 0.05                  | 0.10                  |
| M1...M14 | 1-x,-1/2+y,1/2-z     | x,-1/2-y,-1/2+z     | 57.27                | -7.28                | 2.65                  | 0.83                  |
| M1...M15 | -x,-1/2+y,1/2-z      | -1+x,-1/2-y,-1/2+z  | 53.89                | -6.02                | 2.49                  | 0.69                  |
| M1...M16 | x,-1+y,z             | 1-x,-1-y,1-z        | 8.95                 | -18.06               | 0.41                  | 2.06                  |
| M1...M17 | 1+x,-1/2-y,1/2+z     | 2-x,-1/2+y,1.5-z    | 1.17                 | -0.89                | 0.05                  | 0.10                  |
| Total    |                      |                     | 346.28               | -140.37              | 16.00                 | 16.00                 |

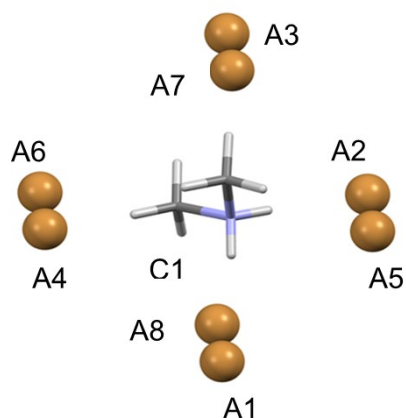

Figure S7. Anions that present contact area with C1 cation of salt **4a**.

Table S7. Symmetry codes, contact area, absolute stabilization energies and N...X distances of each C1...A pair of salt **4a**.

| C1...A  | Anion symmetry code <sup>a</sup> | C <sub>C1...A</sub> <sup>b</sup> | G <sub>C1...A</sub> <sup>c</sup> | G <sub>C1...A1</sub> - G <sub>C1...A</sub>   <sup>d</sup> | N...X <sup>e</sup> |
|---------|----------------------------------|----------------------------------|----------------------------------|-----------------------------------------------------------|--------------------|
| C1...A1 | 1/2-x,1/2-y,1-z                  | 7.90                             | -1700420.23                      | 0.00                                                      | 3.266              |
| C1...A2 | x,1-y,-1/2+z                     | 7.03                             | -1700420.17                      | 0.06                                                      | 3.284              |
| C1...A3 | 1-x,1-y,1-z                      | 6.7                              | -1700404.05                      | 16.18                                                     | 4.191              |
| C1...A4 | x,-1+y,z                         | 6.92                             | -1700402.17                      | 18.06                                                     | 4.320              |
| C1...A5 | x,-y,-1/2+z                      | 4.55                             | -1700391.33                      | 28.90                                                     | 4.757              |
| C1...A6 | x,y,z                            | 4.76                             | -1700389.01                      | 31.22                                                     | 5.182              |
| C1...A7 | 1-x,-y,1-z                       | 2.77                             | -1700385.10                      | 35.13                                                     | 5.424              |
| C1...A8 | 1/2-x,1.5-y,1-z                  | 1.63                             | -1700381.60                      | 38.63                                                     | 5.350              |

<sup>a</sup>Cation C1 symmetry code:  $x,y,z$ . <sup>b</sup>Contact area between C1 and each considered anion, in Å<sup>2</sup>. <sup>c</sup>Absolute energy of each C1...A pair, in a.u.; <sup>d</sup>Difference of absolute energies between the most stable pair and each considered pair, in kcal mol<sup>-1</sup>. <sup>e</sup>Distance, in Å.

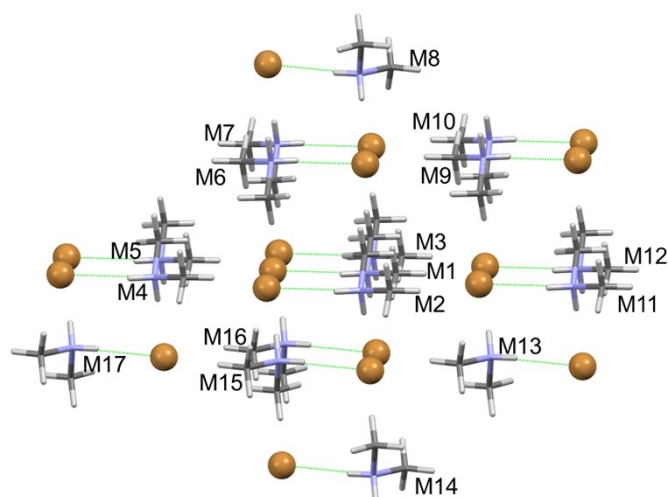

Figure S8. Supramolecular cluster of **4a**.

Table S8. Symmetry codes, contact area ( $C_{M1...MN}$ , in  $\text{\AA}^2$ ) and energetic data ( $G_{M1...MN}$ , in kcal mol $^{-1}$ ) for the supramolecular cluster of salt **4a**.

| Dimer    | Cation symmetry code | Anion symmetry code | $C_{M1...MN}$ | $G_{M1...MN}$ | $NC_{M1...MN}$ | $NG_{M1...MN}$ |
|----------|----------------------|---------------------|---------------|---------------|----------------|----------------|
| M1       | x,y,z                | 1/2-x,1/2-y,1-z     |               |               |                |                |
| M1...M2  | x,-1+y,z             | 1/2-x,-1/2-y,1-z    | 14.69         | 8.06          | 1.51           | -1.32          |
| M1...M3  | x,1+y,z              | 1/2-x,1.5-y,1-z     | 14.69         | 8.06          | 1.51           | -1.32          |
| M1...M4  | -1/2+x,-1/2+y,z      | -x,-y,1-z           | 6.7           | -14.03        | 0.69           | 2.29           |
| M1...M5  | -1/2+x,1/2+y,z       | -x,1-y,1-z          | 2.77          | -5.29         | 0.28           | 0.87           |
| M1...M6  | 1/2-x,-1/2-y,1-z     | x,-1+y,z            | 13.86         | -26.47        | 1.42           | 4.33           |
| M1...M7  | 1/2-x,1/2-y,1-z      | x,y,z               | 22.91         | -19.76        | 2.35           | 3.23           |
| M1...M8  | x,-y,1/2+z           | 1/2-x,-1/2+y,1.5-z  | 0.49          | 5.43          | 0.05           | -0.89          |
| M1...M9  | 1-x,-y,1-z           | 1/2+x,-1/2+y,z      | 18.77         | 4.03          | 1.93           | -0.66          |
| M1...M10 | 1-x,1-y,1-z          | 1/2+x,1/2+y,z       | 0.85          | 2.91          | 0.09           | -0.48          |
| M1...M11 | 1/2+x,-1/2+y,z       | 1-x,-y,1-z          | 2.77          | -5.29         | 0.28           | 0.87           |
| M1...M12 | 1/2+x,1/2+y,z        | 1-x,1-y,1-z         | 6.7           | -14.03        | 0.69           | 2.29           |
| M1...M13 | 1-x,y,1/2-z          | 1/2+x,1/2-y,-1/2+z  | 14.26         | 6.37          | 1.46           | -1.04          |
| M1...M14 | x,-y,-1/2+z          | 1/2-x,-1/2+y,1/2-z  | 0.49          | 5.43          | 0.05           | -0.89          |
| M1...M15 | 1/2-x,-1/2+y,1/2-z   | x,-y,-1/2+z         | 17.86         | -31.34        | 1.83           | 5.13           |
| M1...M16 | 1/2-x,1/2+y,1/2-z    | x,1-y,-1/2+z        | 17.86         | -31.34        | 1.83           | 5.13           |
| M1...M17 | -x,y,1/2-z           | -1/2+x,1/2-y,-1/2+z | 0.09          | 9.43          | 0.01           | -1.54          |
| Total    |                      |                     | 155.76        | -97.82        | 16.00          | 16.00          |

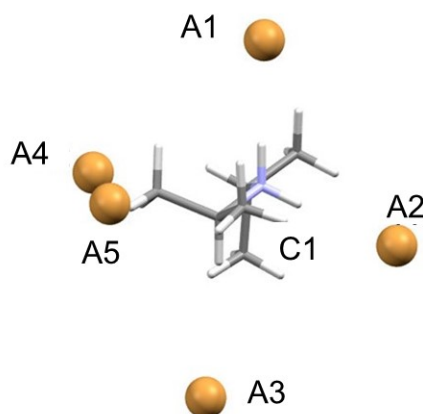

Figure S9. Anions that present contact area with C1 cation of salt **5a**.

Table S9. Symmetry codes, contact area, absolute stabilization energies and N...X distances of each C1...A pair of salt **5a**.

| C1...A  | Anion symmetry code <sup>a</sup> | $C_{C1...A}$ <sup>b</sup> | $G_{C1...A}$ <sup>c</sup> | $ G_{C1...A1} - G_{C1...A} $ <sup>d</sup> | N...X <sup>e</sup> |
|---------|----------------------------------|---------------------------|---------------------------|-------------------------------------------|--------------------|
| C1...A1 | x,y,z                            | 10.12                     | 1799005.68                | 0.00                                      | 3.3380             |
| C1...A2 | -1/2+x,1/2-y,1-z                 | 10.19                     | 1799005.59                | 0.09                                      | 3.3230             |
| C1...A3 | -1+x,y,z                         | 7.17                      | 1798981.33                | 24.35                                     | 4.8140             |
| C1...A4 | 1-x,-1/2+y,1/2-z                 | 7.18                      | 1798981.17                | 24.51                                     | 4.9760             |
| C1...A5 | 1-x,1/2+y,1/2-z                  | 5.74                      | 1798968.51                | 37.17                                     | 6.0050             |

<sup>a</sup>Cation C1 symmetry code: x,y,z. <sup>b</sup>Contact area between C1 and each considered anion, in  $\text{\AA}^2$ . <sup>c</sup>Absolute energy of each C1...A pair, in a.u.; <sup>d</sup>Difference of absolute energies between the most stable pair and each considered pair, in kcal mol $^{-1}$ . <sup>e</sup>Distance, in  $\text{\AA}$ .

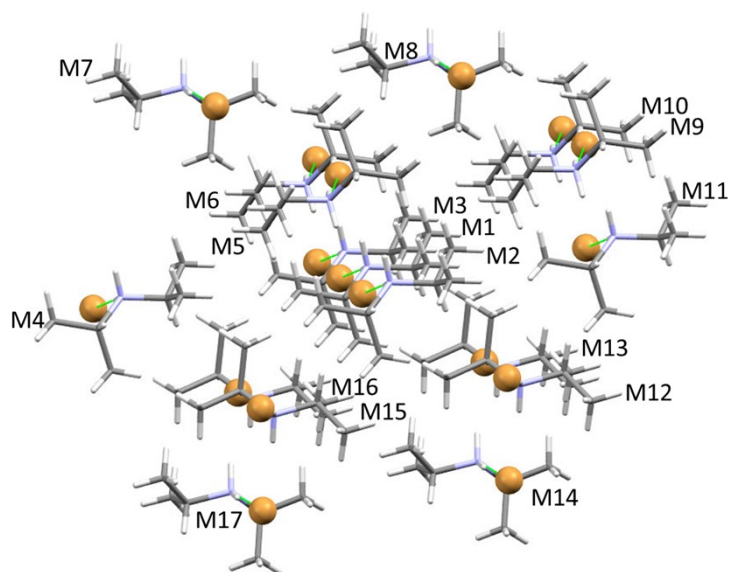

Figure S10. Supramolecular cluster of **5a**.

Table S10. Symmetry codes, contact area ( $C_{M1...MN}$ , in  $\text{\AA}^2$ ) and energetic data ( $G_{M1...MN}$ , in  $\text{kcal mol}^{-1}$ ) for the supramolecular cluster of salt **5a**.

| Dimer    | Cation symmetry code | Anion symmetry code | $C_{M1...MN}$ | $G_{M1...MN}$ | $NC_{M1...MN}$ | $NG_{M1...MN}$ |
|----------|----------------------|---------------------|---------------|---------------|----------------|----------------|
| M1       | x,y,z                | x,y,z               |               |               |                |                |
| M1...M2  | -1+x,y,z             | -1+x,y,z            | 7.17          | -9.55         | 0.51           | 1.87           |
| M1...M3  | 1+x,y,z              | 1+x,y,z             | 7.17          | -9.55         | 0.51           | 1.87           |
| M1...M4  | x,1+y,z              | x,1+y,z             | 11.09         | 2.23          | 0.79           | -0.44          |
| M1...M5  | -1/2+x,1/2-y,1-z     | -1/2+x,1/2-y,1-z    | 29.71         | -12.66        | 2.12           | 2.48           |
| M1...M6  | 1/2+x,1/2-y,1-z      | 1/2+x,1/2-y,1-z     | 29.71         | -12.66        | 2.12           | 2.48           |
| M1...M7  | 1/2-x,1-y,1/2+z      | 1/2-x,1-y,1/2+z     | 0.77          | -1.96         | 0.05           | 0.38           |
| M1...M8  | 1/2-x,-y,1/2+z       | 1/2-x,-y,1/2+z      | 8.35          | -1.64         | 0.60           | 0.32           |
| M1...M9  | -1/2+x,-1/2-y,1-z    | -1/2+x,-1/2-y,1-z   | 9.02          | 0.44          | 0.64           | -0.09          |
| M1...M10 | 1/2+x,-1/2-y,1-z     | 1/2+x,-1/2-y,1-z    | 9.02          | 0.44          | 0.64           | -0.09          |
| M1...M11 | x,-1+y,z             | x,-1+y,z            | 11.09         | 2.23          | 0.79           | -0.44          |
| M1...M12 | -x,-1/2+y,1/2-z      | -x,-1/2+y,1/2-z     | 13.69         | 0.69          | 0.98           | -0.13          |
| M1...M13 | 1-x,-1/2+y,1/2-z     | 1-x,-1/2+y,1/2-z    | 32.27         | -18.45        | 2.30           | 3.61           |
| M1...M14 | 1/2-x,-y,-1/2+z      | 1/2-x,-y,-1/2+z     | 8.35          | -1.64         | 0.60           | 0.32           |
| M1...M15 | -x,1/2+y,1/2-z       | -x,1/2+y,1/2-z      | 13.69         | 0.69          | 0.98           | -0.13          |
| M1...M16 | 1-x,1/2+y,1/2-z      | 1-x,1/2+y,1/2-z     | 32.27         | -18.45        | 2.30           | 3.61           |
| M1...M17 | 1/2-x,1-y,-1/2+z     | 1/2-x,1-y,-1/2+z    | 0.77          | -1.96         | 0.05           | 0.38           |
| Total    |                      |                     | 224.14        | -81.84        | 16.00          | 16.00          |



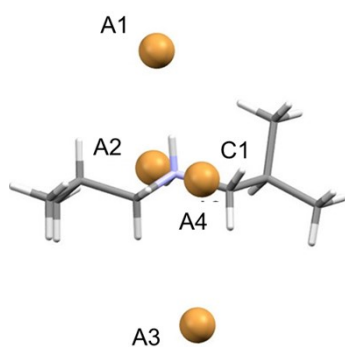

Figure S11. Anions that present contact area with C1 cation of salt **6a**.

Table S11. Symmetry codes, contact area, absolute stabilization energies and N...X distances of each C1...A pair of salt **6a**.

| C1...A  | Anion symmetry code <sup>a</sup> | $C_{C1...A}$ <sup>b</sup> | $G_{C1...A}$ <sup>c</sup> | $ G_{C1...A1} - G_{C1...A} $ <sup>d</sup> | N...X <sup>e</sup> |
|---------|----------------------------------|---------------------------|---------------------------|-------------------------------------------|--------------------|
| C1...A1 | 1/2+x,1/2-y,z                    | 10.93                     | 1848352.31                | 0.00                                      | 3.280              |
| C1...A2 | x,y,z                            | 13.61                     | 1848350.72                | 1.59                                      | 3.346              |
| C1...A3 | 1-x,-y,z                         | 9.33                      | 1848338.11                | 14.21                                     | 4.021              |
| C1...A4 | 1+x,y,z                          | 5.87                      | 1848331.08                | 21.23                                     | 4.430              |

<sup>a</sup>Cation C1 symmetry code:  $x,y,z$ . <sup>b</sup>Contact area between C1 and each considered anion, in Å<sup>2</sup>. <sup>c</sup>Absolute energy of each C1...A pair, in a.u.; <sup>d</sup>Difference of absolute energies between the most stable pair and each considered pair, in kcal mol<sup>-1</sup>. <sup>e</sup>Distance, in Å.

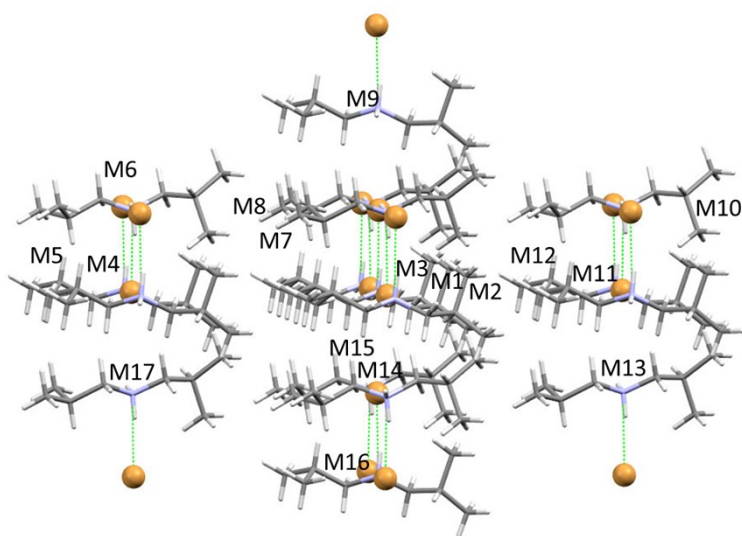

Figure S12. Supramolecular cluster of **6a**.

Table S12. Symmetry codes, contact area ( $C_{M1...MN}$ , in  $\text{\AA}^2$ ) and energetic data ( $G_{M1...MN}$ , in kcal mol $^{-1}$ ) for the supramolecular cluster of salt **6a**.

| Dimer    | Cation symmetry code | Anion symmetry code | $C_{M1...MN}$ | $G_{M1...MN}$ | $NC_{M1...MN}$ | $NG_{M1...MN}$ |
|----------|----------------------|---------------------|---------------|---------------|----------------|----------------|
| M1       | x,y,z                | 1/2+x,1/2-y,z       |               |               |                |                |
| M1...M2  | 1+x,y,z              | 1.5+x,1/2-y,z       | 1.39          | 3.17          | 0.08           | -0.55          |
| M1...M3  | -1+x,y,z             | -1/2+x,1/2-y,z      | 1.39          | 3.17          | 0.08           | -0.55          |
| M1...M4  | 2-x,y,1/2+z          | 1.5-x,1/2-y,1/2+z   | 10.35         | 0.66          | 0.61           | -0.12          |
| M1...M5  | 1-x,y,1/2+z          | 1/2-x,1/2-y,1/2+z   | 8.23          | 0.79          | 0.48           | -0.14          |
| M1...M6  | 1.5-x,1/2-y,1/2+z    | 1-x,y,1/2+z         | 8.69          | -3.52         | 0.51           | 0.62           |
| M1...M7  | 1/2+x,1/2-y,z        | 1+x,y,z             | 50.17         | -32.71        | 2.95           | 5.72           |
| M1...M8  | -1/2+x,1/2-y,z       | x,y,z               | 50.17         | -32.71        | 2.95           | 5.72           |
| M1...M9  | 1.5-x,1/2+y,z        | 1-x,1-y,z           | 12.46         | -12.63        | 0.73           | 2.21           |
| M1...M10 | 1.5-x,1/2-y,-1/2+z   | 1-x,y,-1/2+z        | 8.69          | -3.52         | 0.51           | 0.62           |
| M1...M11 | 2-x,y,-1/2+z         | 1.5-x,1/2-y,-1/2+z  | 10.35         | 0.66          | 0.61           | -0.12          |
| M1...M12 | 1-x,y,-1/2+z         | 1/2-x,1/2-y,-1/2+z  | 8.23          | 0.79          | 0.48           | -0.14          |
| M1...M13 | x,-y,-1/2+z          | 1/2+x,-1/2+y,-1/2+z | 11.87         | -0.88         | 0.70           | 0.15           |
| M1...M14 | 2-x,-y,z             | 1.5-x,-1/2+y,z      | 35.99         | -1.38         | 2.12           | 0.24           |
| M1...M15 | 1-x,-y,z             | 1/2-x,-1/2+y,z      | 29.86         | 0.17          | 1.76           | -0.03          |
| M1...M16 | 1.5-x,-1/2+y,z       | 1-x,-y,z            | 12.46         | -12.63        | 0.73           | 2.21           |
| M1...M17 | x,-y,1/2+z           | 1/2+x,-1/2+y,1/2+z  | 11.87         | -0.88         | 0.70           | 0.15           |
| Total    |                      |                     | 272.17        | -91.48        | 16.00          | 16.00          |

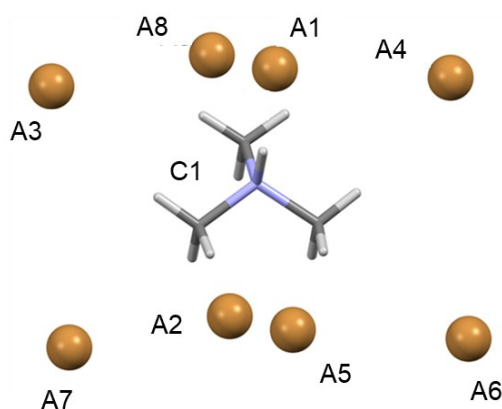

Figure S13. Anions that present contact area with C1 cation of salt **7a**.

Table S13. Symmetry codes, contact area, absolute stabilization energies and N...X distances of each C1...A pair of salt **7a**.

| C1...A  | Anion symmetry code <sup>a</sup> | $C_{C1...A}$ <sup>b</sup> | $G_{C1...A}$ <sup>c</sup> | $ G_{C1...A1} - G_{C1...A} $ <sup>d</sup> | N...X <sup>e</sup> |
|---------|----------------------------------|---------------------------|---------------------------|-------------------------------------------|--------------------|
| C1...A1 | -x,1/2+y,1-z                     | 7.98                      | 1725117.51                | 0.00                                      | 3.237              |
| C1...A2 | 1-x,1/2+y,2-z                    | 7.67                      | 1725100.13                | 17.39                                     | 4.222              |
| C1...A3 | x,1+y,z                          | 5.17                      | 1725091.14                | 26.37                                     | 4.571              |
| C1...A4 | x,y,z                            | 5.17                      | 1725091.14                | 26.37                                     | 4.571              |
| C1...A5 | 1-x,1/2+y,1-z                    | 5.07                      | 1725088.89                | 28.62                                     | 4.697              |
| C1...A6 | 1+x,y,z                          | 3.84                      | 1725080.39                | 37.13                                     | 5.286              |
| C1...A7 | 1+x,1+y,z                        | 3.84                      | 1725080.39                | 37.13                                     | 5.286              |
| C1...A8 | -x,1/2+y,2-z                     | 3.52                      | 1725079.98                | 37.53                                     | 5.304              |

<sup>a</sup>Cation C1 symmetry code: x,y,z. <sup>b</sup>Contact area between C1 and each considered anion, in  $\text{\AA}^2$ . <sup>c</sup>Absolute energy of each C1...A pair, in a.u.; <sup>d</sup>Difference of absolute energies between the most stable pair and each considered pair, in kcal mol $^{-1}$ . <sup>e</sup>Distance, in  $\text{\AA}$ .

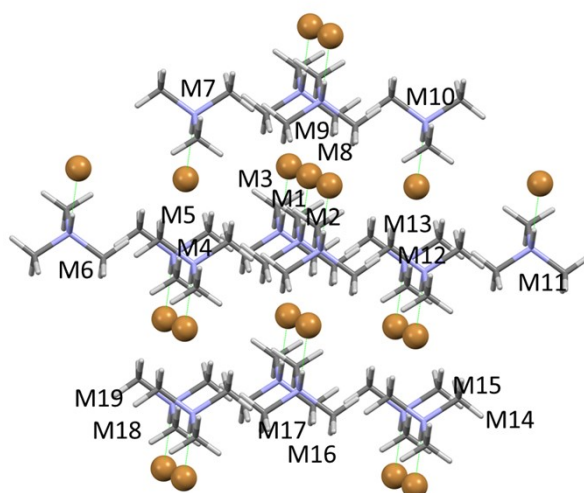

Figure S14. Anions that present contact area with C1 cation of salt **7a**.

Table S14. Symmetry codes, contact area ( $C_{M1...MN}$ , in  $\text{\AA}^2$ ) and energetic data ( $G_{M1...MN}$ , in  $\text{kcal mol}^{-1}$ ) for the supramolecular cluster of salt **7a**.

| Dimer    | Cation symmetry code | Anion symmetry code | $C_{M1...MN}$ | $G_{M1...MN}$ | $NC_{M1...MN}$ | $NG_{M1...MN}$ |
|----------|----------------------|---------------------|---------------|---------------|----------------|----------------|
| M1       | x,y,z                | -x,0.5+y,1-z        |               |               |                |                |
| M1...M2  | x,y,-1+z             | -x,0.5+y,-z         | 3.6           | -2.99         | 0.37           | 0.63           |
| M1...M3  | x,y,1+z              | -x,0.5+y,2-z        | 3.6           | -2.99         | 0.37           | 0.63           |
| M1...M4  | 1-x,0.5+y,1-z        | 1+x,1+y,z           | 22.7          | -15.93        | 2.36           | 3.35           |
| M1...M5  | 1-x,0.5+y,2-z        | 1+x,1+y,1+z         | 19.72         | 1.71          | 2.05           | -0.36          |
| M1...M6  | x,1+y,z              | -x,1.5+y,1-z        | 0.21          | 3.69          | 0.02           | -0.78          |
| M1...M7  | -x,0.5+y,1-z         | x,1+y,z             | 10.34         | -19.41        | 1.07           | 4.08           |
| M1...M8  | -1+x,y,-1+z          | -1-x,0.5+y,-z       | 7.67          | -12.46        | 0.80           | 2.62           |
| M1...M9  | -1+x,y,z             | -1-x,0.5+y,1-z      | 21.37         | 1.43          | 2.22           | -0.30          |
| M1...M10 | -x,-0.5+y,1-z        | x,y,z               | 10.34         | -19.41        | 1.07           | 4.08           |
| M1...M11 | x,-1+y,z             | -x,-0.5+y,1-z       | 0.21          | 3.69          | 0.02           | -0.78          |
| M1...M12 | 1-x,-0.5+y,1-z       | 1+x,y,z             | 22.7          | -15.93        | 2.36           | 3.35           |
| M1...M13 | 1-x,-0.5+y,2-z       | 1+x,y,1+z           | 19.72         | 1.71          | 2.05           | -0.36          |
| M1...M14 | 2-x,-0.5+y,1-z       | 2+x,y,z             | 0.07          | -1.34         | 0.01           | 0.28           |
| M1...M15 | 2-x,-0.5+y,2-z       | 2+x,y,1+z           | 0.9           | 2.52          | 0.09           | -0.53          |
| M1...M16 | 1+x,y,z              | 1-x,0.5+y,1-z       | 21.37         | 1.43          | 2.22           | -0.30          |
| M1...M17 | 1+x,y,1+z            | 1-x,0.5+y,2-z       | 7.67          | -12.46        | 0.80           | 2.62           |
| M1...M18 | 2-x,0.5+y,1-z        | 2+x,1+y,z           | 0.07          | -1.34         | 0.01           | 0.28           |
| M1...M19 | 2-x,0.5+y,2-z        | 2+x,1+y,1+z         | 0.9           | 2.52          | 0.09           | -0.53          |
| Total    |                      |                     | 173.16        | -85.55        | 18.00          | 18.00          |

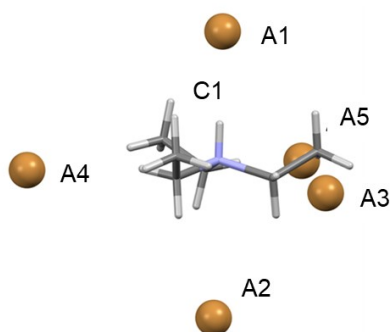

Figure S15. Anions that present contact area with C1 cation of salt **8a**.

Table S15. Symmetry codes, contact area, absolute stabilization energies and N...X distances of each C1...A pair of salt **8a**.

| C1...A  | Anion symmetry code <sup>a</sup> | C <sub>C1...A</sub> <sup>b</sup> | G <sub>C1...A</sub> <sup>c</sup> | G <sub>C1...A1</sub> - G <sub>C1...A</sub>   <sup>d</sup> | N...X <sup>e</sup> |
|---------|----------------------------------|----------------------------------|----------------------------------|-----------------------------------------------------------|--------------------|
| C1...A1 | x,y,z                            | 11.23                            | 1798990.28                       | 0.00                                                      | 3.282              |
| C1...A2 | x,y,1+z                          | 8.68                             | 1798972.67                       | 17.61                                                     | 4.031              |
| C1...A3 | y,1+x,1/2+z                      | 6.30                             | 1798964.36                       | 25.92                                                     | 4.841              |
| C1...A4 | -1+y,x,1/2+z                     | 6.30                             | 1798964.35                       | 25.93                                                     | 4.840              |
| C1...A5 | y,x,1/2+z                        | 6.30                             | 1798964.35                       | 25.94                                                     | 4.841              |

<sup>a</sup>Cation C1 symmetry code: x,y,z. <sup>b</sup>Contact area between C1 and each considered anion, in Å<sup>2</sup>. <sup>c</sup>Absolute energy of each C1...A pair, in a.u.; <sup>d</sup>Difference of absolute energies between the most stable pair and each considered pair, in kcal mol<sup>-1</sup>. <sup>e</sup>Distance, in Å.

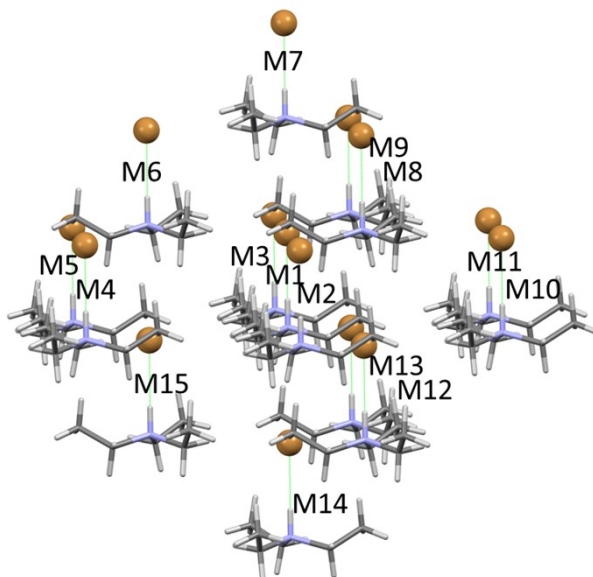

Figure S16. Supramolecular cluster of **8a**.

Table S16. Symmetry codes, contact area (C<sub>M1...MN</sub>, in Å<sup>2</sup>) and energetic data (G<sub>M1...MN</sub>, in kcal mol<sup>-1</sup>) for the supramolecular cluster of salt **8a**.

| Dimer    | Cation symmetry code | Anion symmetry code | C <sub>M1...MN</sub> | G <sub>M1...MN</sub> | NC <sub>M1...MN</sub> | NG <sub>M1...MN</sub> |
|----------|----------------------|---------------------|----------------------|----------------------|-----------------------|-----------------------|
| M1       | x,y,z                | x,y,z               |                      |                      |                       |                       |
| M1...M2  | x,1+y,z              | x,1+y,z             | 7.47                 | 2.46                 | 0.47                  | -1.20                 |
| M1...M3  | x,-1+y,z             | x,-1+y,z            | 7.47                 | 2.46                 | 0.47                  | -1.20                 |
| M1...M4  | -1+x,y,z             | -1+x,y,z            | 7.47                 | 2.45                 | 0.47                  | -1.19                 |
| M1...M5  | -1+x,-1+y,z          | -1+x,-1+y,z         | 7.47                 | 2.47                 | 0.47                  | -1.20                 |
| M1...M6  | -1+y,x,-0.5+z        | -1+y,x,-0.5+z       | 26.73                | -3.81                | 1.68                  | 1.86                  |
| M1...M7  | x,y,-1+z             | x,y,-1+z            | 8.68                 | -10.33               | 0.55                  | 5.03                  |
| M1...M8  | y,1+x,-0.5+z         | y,1+x,-0.5+z        | 26.73                | -3.81                | 1.68                  | 1.85                  |
| M1...M9  | y,x,-0.5+z           | y,x,-0.5+z          | 26.73                | -3.81                | 1.68                  | 1.86                  |
| M1...M10 | 1+x,1+y,z            | 1+x,1+y,z           | 7.47                 | 2.45                 | 0.47                  | -1.19                 |
| M1...M11 | 1+x,y,z              | 1+x,y,z             | 7.47                 | 2.46                 | 0.47                  | -1.20                 |
| M1...M12 | y,1+x,0.5+z          | y,1+x,0.5+z         | 26.73                | -3.81                | 1.68                  | 1.85                  |
| M1...M13 | y,x,0.5+z            | y,x,0.5+z           | 26.73                | -3.81                | 1.68                  | 1.86                  |
| M1...M14 | x,y,1+z              | x,y,1+z             | 8.68                 | -10.33               | 0.55                  | 5.03                  |
| M1...M15 | -1+y,x,0.5+z         | -1+y,x,0.5+z        | 26.73                | -3.81                | 1.68                  | 1.86                  |
| Total    |                      |                     | 222.56               | -28.76               | 14.00                 | 14.00                 |

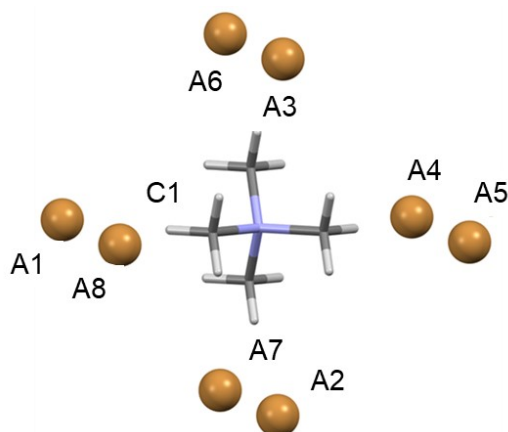

Figure S17. Anions that present contact area with C1 cation of salt **9a**.

Table S17. Symmetry codes, contact area, absolute stabilization energies and N...X distances of each C1...A pair of salt **9a**.

| C1...A  | Anion symmetry code <sup>a</sup> | $C_{C1...A}$ <sup>b</sup> | $G_{C1...A}$ <sup>c</sup> | $ G_{C1...A1} - G_{C1...A} $ <sup>d</sup> | N...X <sup>e</sup> |
|---------|----------------------------------|---------------------------|---------------------------|-------------------------------------------|--------------------|
| C1...A1 | $\frac{1}{2}+x, 1-y, 1-z$        | 5.88                      | 1749720.01                | 0.00                                      | 4.345              |
| C1...A2 | $1+x, y, -1+z$                   | 5.88                      | 1749720.01                | 0.00                                      | 4.345              |
| C1...A3 | $x, y, -1+z$                     | 5.88                      | 1749720.01                | 0.00                                      | 4.345              |
| C1...A4 | $\frac{1}{2}+x, -y, 1-z$         | 5.88                      | 1749720.01                | 0.00                                      | 4.345              |
| C1...A5 | $\frac{1}{2}+x, -y, -z$          | 4.04                      | 1749706.63                | 13.38                                     | 5.125              |
| C1...A6 | $x, y, z$                        | 4.04                      | 1749706.63                | 13.38                                     | 5.125              |
| C1...A7 | $1+x, y, z$                      | 4.04                      | 1749706.63                | 13.38                                     | 5.125              |
| C1...A8 | $\frac{1}{2}+x, 1-y, -z$         | 4.04                      | 1749706.63                | 13.38                                     | 5.125              |

<sup>a</sup>Cation C1 symmetry code:  $x, y, z$ . <sup>b</sup>Contact area between C1 and each considered anion, in  $\text{\AA}^2$ . <sup>c</sup>Absolute energy of each C1...A pair, in a.u.; <sup>d</sup>Difference of absolute energies between the most stable pair and each considered pair, in  $\text{kcal mol}^{-1}$ . <sup>e</sup>Distance, in  $\text{\AA}$ .

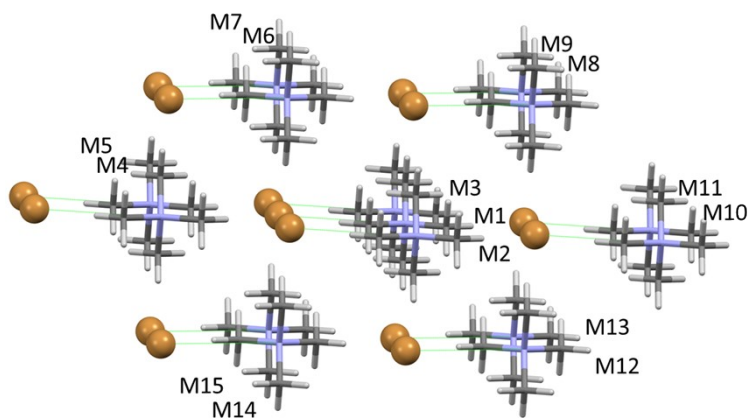

Figure S18. Supramolecular cluster of **9a**.

Table S18. Symmetry codes, contact area ( $C_{M1...MN}$ , in  $\text{\AA}^2$ ) and energetic data ( $G_{M1...MN}$ , in  $\text{kcal mol}^{-1}$ ) for the supramolecular cluster of salt **9a**.

| Dimer    | Cation symmetry code | Anion symmetry code | $C_{M1...MN}$ | $G_{M1...MN}$ | $NC_{M1...MN}$ | $NG_{M1...MN}$ |
|----------|----------------------|---------------------|---------------|---------------|----------------|----------------|
| M1       | x,y,z                | 0.5+x,1-y,1-z       |               |               |                |                |
| M1...M2  | x,y,-1+z             | 0.5+x,1-y,-z        | 23.44         | 6.60          | 1.80           | -1.09          |
| M1...M3  | x,y,1+z              | 0.5+x,1-y,2-z       | 23.44         | 6.60          | 1.80           | -1.09          |
| M1...M4  | x,1+y,z              | 0.5+x,2-y,1-z       | 5.88          | -14.74        | 0.45           | 2.42           |
| M1...M5  | x,1+y,1+z            | 0.5+x,2-y,2-z       | 4.04          | -13.82        | 0.31           | 2.27           |
| M1...M6  | 0.5-y,x,z            | x,1+y,-1+z          | 24.82         | -8.86         | 1.91           | 1.46           |
| M1...M7  | 0.5-y,x,1+z          | x,1+y,z             | 4.04          | -1.44         | 0.31           | 0.24           |
| M1...M8  | 0.5-y,-1+x,z         | x,y,-1+z            | 24.82         | -8.86         | 1.91           | 1.46           |
| M1...M9  | 0.5-y,-1+x,1+z       | x,y,z               | 4.04          | -1.44         | 0.31           | 0.24           |
| M1...M10 | x,-1+y,-1+z          | 0.5+x,-y,-z         | 4.04          | -13.82        | 0.31           | 2.27           |
| M1...M11 | x,-1+y,z             | 0.5+x,-y,1-z        | 5.88          | -14.74        | 0.45           | 2.42           |
| M1...M12 | 1.5-y,-1+x,z         | 1+x,y,-1+z          | 24.82         | -8.86         | 1.91           | 1.46           |
| M1...M13 | 1.5-y,-1+x,1+z       | 1+x,y,z             | 4.04          | -1.44         | 0.31           | 0.24           |
| M1...M14 | 1.5-y,x,z            | 1+x,1+y,-1+z        | 24.82         | -8.86         | 1.91           | 1.46           |
| M1...M15 | 1.5-y,x,1+z          | 1+x,1+y,z           | 4.04          | -1.44         | 0.31           | 0.24           |
| Total    |                      |                     | 182.16        | -85.12        | 14.00          | 14.00          |

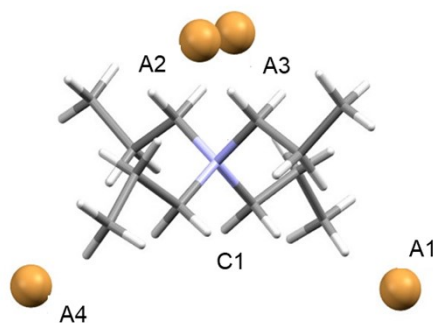

Figure S19. Anions that present contact area with C1 cation of salt **11a**.

Table S19. Symmetry codes, contact area, absolute stabilization energies and  $N...X$  distances of each  $C1...A$  pair of salt **11a**.

| $C1...A$  | Anion symmetry code <sup>a</sup> | $C_{C1...A}$ <sup>b</sup> | $G_{C1...A}$ <sup>c</sup> | $ G_{C1...A1} - G_{C1...A} $ <sup>d</sup> | $N...X$ <sup>e</sup> |
|-----------|----------------------------------|---------------------------|---------------------------|-------------------------------------------|----------------------|
| $C1...A1$ | x,y,z                            | 9.84                      | -1946939.89               | 0.00                                      | 4.9034               |
| $C1...A2$ | 1/2+x,1/2+y,1/2+z                | 9.84                      | -1946939.89               | 0.00                                      | 4.9034               |
| $C1...A3$ | 1/2+x,-1/2+y,1/2+z               | 9.84                      | -1946939.89               | 0.00                                      | 4.9034               |
| $C1...A4$ | 1+x,y,z                          | 9.84                      | -1946939.89               | 0.00                                      | 4.9034               |

<sup>a</sup>Cation C1 symmetry code: x,y,z. <sup>b</sup>Contact area between C1 and each considered anion, in  $\text{\AA}^2$ . <sup>c</sup>Absolute energy of each  $C1...A$  pair, in a.u.; <sup>d</sup>Difference of absolute energies between the most stable pair and each considered pair, in  $\text{kcal mol}^{-1}$ . <sup>e</sup>Distance, in  $\text{\AA}$ .

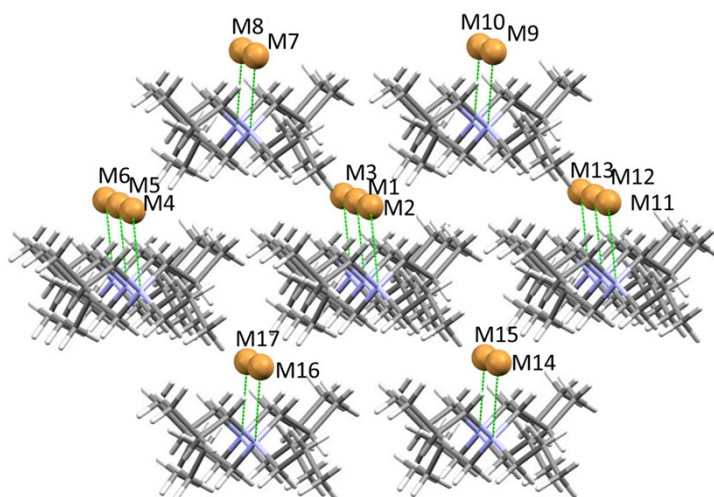

Figure S20. Supramolecular cluster of **11a**.

Table S20. Symmetry codes, contact area ( $C_{M1...MN}$ , in  $\text{\AA}^2$ ) and energetic data ( $G_{M1...MN}$ , in  $\text{kcal mol}^{-1}$ ) the supramolecular cluster of salt **11a**.

| Dimer    | Cation symmetry code | Anion symmetry code | $C_{M1...MN}$ | $G_{M1...M}$<br>N | $NC_{M1...MN}$ | $NG_{M1...MN}$ |
|----------|----------------------|---------------------|---------------|-------------------|----------------|----------------|
| M1       | x,y,z                | x,y,z               |               |                   |                |                |
| M1...M2  | 1+x,y,z              | 1+x,y,z             | 40.37         | -15.29            | 1.89           | 2.34           |
| M1...M3  | -1+x,y,z             | -1+x,y,z            | 40.37         | -15.29            | 1.89           | 2.34           |
| M1...M4  | 1+x,1+y,z            | 1+x,1+y,z           | 4.07          | -0.80             | 0.19           | 0.12           |
| M1...M5  | x,1+y,z              | x,1+y,z             | 30.53         | 3.37              | 1.43           | -0.52          |
| M1...M6  | -1+x,1+y,z           | -1+x,1+y,z          | 4.07          | 0.01              | 0.19           | 0.00           |
| M1...M7  | 1.5+x,1/2+y,-1/2+z   | 1.5+x,1/2+y,-1/2+z  | 18            | -0.88             | 0.84           | 0.13           |
| M1...M8  | 1/2+x,1/2+y,-1/2+z   | 1/2+x,1/2+y,-1/2+z  | 27.84         | -19.08            | 1.30           | 2.92           |
| M1...M9  | 1.5+x,-1/2+y,-1/2+z  | 1.5+x,-1/2+y,-1/2+z | 18            | -1.38             | 0.84           | 0.21           |
| M1...M10 | 1/2+x,-1/2+y,-1/2+z  | 1/2+x,-1/2+y,-1/2+z | 27.84         | -18.24            | 1.30           | 2.79           |
| M1...M11 | 1+x,-1+y,z           | 1+x,-1+y,z          | 4.07          | 0.01              | 0.19           | 0.00           |
| M1...M12 | x,-1+y,z             | x,-1+y,z            | 30.53         | 3.37              | 1.43           | -0.52          |
| M1...M13 | -1+x,-1+y,z          | -1+x,-1+y,z         | 4.07          | -0.80             | 0.19           | 0.12           |
| M1...M14 | 1.5+x,-1/2+y,1/2+z   | 1.5+x,-1/2+y,1/2+z  | 18            | -1.38             | 0.84           | 0.21           |
| M1...M15 | 1/2+x,-1/2+y,1/2+z   | 1/2+x,-1/2+y,1/2+z  | 27.84         | -18.24            | 1.30           | 2.79           |
| M1...M16 | 1.5+x,1/2+y,1/2+z    | 1.5+x,1/2+y,1/2+z   | 18            | -0.88             | 0.84           | 0.13           |
| M1...M17 | 1/2+x,1/2+y,1/2+z    | 1/2+x,1/2+y,1/2+z   | 27.84         | -19.08            | 1.30           | 2.92           |
| Total    |                      |                     | 341.44        | -104.59           | 16.00          | 16.00          |

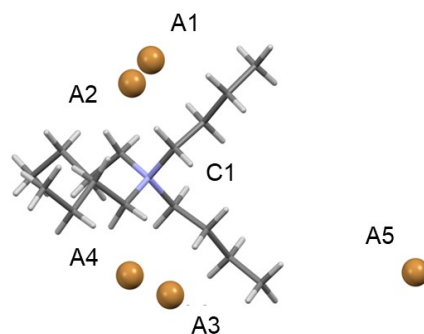

Figure S21. Anions that present contact area with C1 cation of salt **12a**.

Table S21. Symmetry codes, contact area, absolute stabilization energies and N...X distances of each C1...A pair of salt **12a**.

| C1...A  | Anion symmetry code <sup>a</sup> | C <sub>C1...A</sub> <sup>b</sup> | G <sub>C1...A</sub> <sup>c</sup> | G <sub>C1...A1</sub> - G <sub>C1...A</sub>   <sup>d</sup> | N...X <sup>e</sup> |
|---------|----------------------------------|----------------------------------|----------------------------------|-----------------------------------------------------------|--------------------|
| C1...A1 | x,y,z                            | 11.04                            | -2045544.9669543                 | 0.00                                                      | 4.935              |
| C1...A2 | 1-x,1-y,1-z                      | 11.07                            | -2045544.5928721                 | 0.37                                                      | 4.963              |
| C1...A3 | -1/2+x,-1/2+y,z                  | 10.78                            | -2045544.5029734                 | 0.46                                                      | 4.973              |
| C1...A4 | 1.5-x,1/2-y,1-z                  | 10.87                            | -2045544.3072543                 | 0.66                                                      | 4.983              |
| C1...A5 | 1.5-x,-1/2+y,1.5-z               | 0.71                             | -2045509.3120784                 | 35.65                                                     | 9.426              |

<sup>a</sup>Cation C1 symmetry code: x,y,z. <sup>b</sup>Contact area between C1 and each considered anion, in Å<sup>2</sup>. <sup>c</sup>Absolute energy of each C1...A pair, in a.u.; <sup>d</sup>Difference of absolute energies between the most stable pair and each considered pair, in kcal mol<sup>-1</sup>. <sup>e</sup>Distance, in Å.

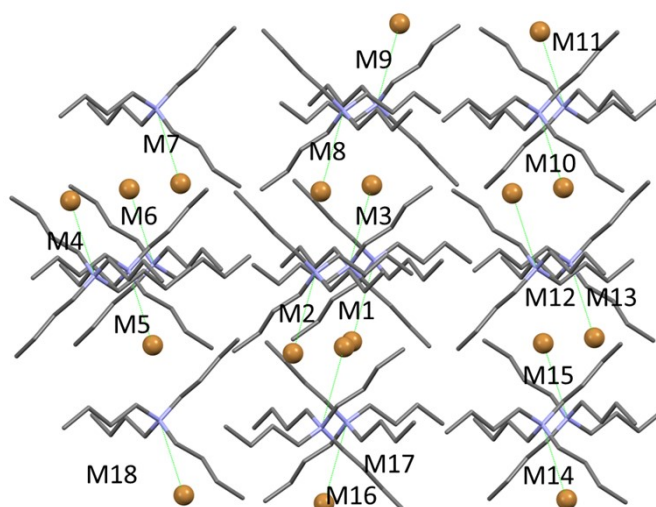

Figure S22. Supramolecular cluster of **12a**. Hydrogens were omitted for clarity.

Table S22. Symmetry codes, contact area (C<sub>M1...MN</sub>, in Å<sup>2</sup>) and energetic data (G<sub>M1...MN</sub>, in kcal mol<sup>-1</sup>) for the supramolecular cluster of salt **12a**.

| Dimer    | Cation symmetry code | Anion symmetry code | C <sub>M1...MN</sub> | G <sub>M1...M</sub> <sub>N</sub> | NC <sub>M1...MN</sub> | NG <sub>M1...MN</sub> |
|----------|----------------------|---------------------|----------------------|----------------------------------|-----------------------|-----------------------|
| M1       | x,y,z                | x,y,z               |                      |                                  |                       |                       |
| M1...M2  | 1/2-x,1/2-y,1-z      | 1/2-x,1/2-y,1-z     | 52.66                | -3.20                            | 2.05                  | 0.38                  |
| M1...M3  | 1.5-x,1/2-y,1-z      | 1.5-x,1/2-y,1-z     | 74.90                | -41.09                           | 2.92                  | 4.90                  |
| M1...M4  | -x,y,1/2-z           | -x,y,1/2-z          | 4.14                 | 0.72                             | 0.16                  | -0.09                 |
| M1...M5  | -1/2+x,1/2-y,-1/2+z  | -1/2+x,1/2-y,-1/2+z | 24.23                | -3.54                            | 0.94                  | 0.42                  |
| M1...M6  | 1-x,y,1/2-z          | 1-x,y,1/2-z         | 29.04                | -4.73                            | 1.13                  | 0.56                  |
| M1...M7  | x,1-y,-1/2+z         | x,1-y,-1/2+z        | 7.59                 | -1.06                            | 0.30                  | 0.13                  |
| M1...M8  | 1-x,1-y,1-z          | 1-x,1-y,1-z         | 75.57                | -41.31                           | 2.94                  | 4.92                  |
| M1...M9  | 1/2+x,1/2+y,z        | 1/2+x,1/2+y,z       | 10.82                | -16.30                           | 0.42                  | 1.94                  |
| M1...M10 | x,1-y,1/2+z          | x,1-y,1/2+z         | 7.59                 | -1.06                            | 0.30                  | 0.13                  |
| M1...M11 | 1.5-x,1/2+y,1.5-z    | 1.5-x,1/2+y,1.5-z   | 11.39                | -3.75                            | 0.44                  | 0.45                  |
| M1...M12 | 1-x,y,1.5-z          | 1-x,y,1.5-z         | 21.5                 | -1.34                            | 0.84                  | 0.16                  |
| M1...M13 | 1/2+x,1/2-y,1/2+z    | 1/2+x,1/2-y,1/2+z   | 24.23                | -3.54                            | 0.94                  | 0.42                  |
| M1...M14 | x,-y,1/2+z           | x,-y,1/2+z          | 8.49                 | 0.28                             | 0.33                  | -0.03                 |
| M1...M15 | 1.5-x,-1/2+y,1.5-z   | 1.5-x,-1/2+y,1.5-z  | 11.39                | -3.75                            | 0.44                  | 0.45                  |
| M1...M16 | -1/2+x,-1/2+y,z      | -1/2+x,-1/2+y,z     | 10.78                | -16.30                           | 0.42                  | 1.94                  |
| M1...M17 | 1-x,-y,1-z           | 1-x,-y,1-z          | 53.96                | -2.90                            | 2.10                  | 0.35                  |
| M1...M18 | x,-y,-1/2+z          | x,-y,-1/2+z         | 8.49                 | 0.28                             | 0.33                  | -0.03                 |
| Total    |                      |                     | 436.77               | -142.60                          | 17.00                 | 17.00                 |



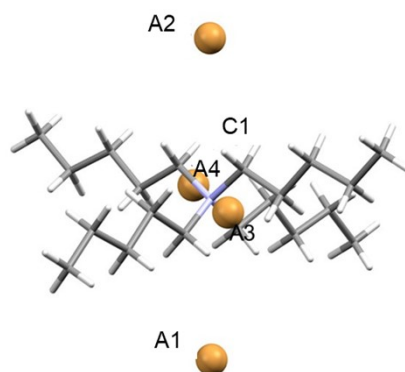

Figure S23. Anions that present contact area with C1 cation of salt **13a**.

Table S23. Symmetry codes, contact area, absolute stabilization energies and N...X distances of each C1...A pair of salt **13a**.

| C1...A  | Anion symmetry code <sup>a</sup> | $C_{C1...A}$ <sup>b</sup> | $G_{C1...A}$ <sup>c</sup> | $ G_{C1...A1} - G_{C1...A} $ <sup>d</sup> | N...X <sup>e</sup> |
|---------|----------------------------------|---------------------------|---------------------------|-------------------------------------------|--------------------|
| C1...A1 | $x,y,z$                          | 7.75                      | 2144149.79                | 0.00                                      | 4.6171             |
| C1...A2 | $1.5-x,1/2-y,1-z$                | 7.75                      | 2144149.79                | 0.00                                      | 4.6171             |
| C1...A3 | $x,y,1+z$                        | 14.50                     | 2144149.68                | 0.10                                      | 5.2517             |
| C1...A4 | $1/2-x,1/2-y,1-z$                | 14.50                     | 2144149.68                | 0.10                                      | 5.2517             |

<sup>a</sup>Cation C1 symmetry code:  $x,y,z$ . <sup>b</sup>Contact area between C1 and each considered anion, in Å<sup>2</sup>. <sup>c</sup>Absolute energy of each C1...A pair, in a.u.; <sup>d</sup>Difference of absolute energies between the most stable pair and each considered pair, in kcal mol<sup>-1</sup>. <sup>e</sup>Distance, in Å.

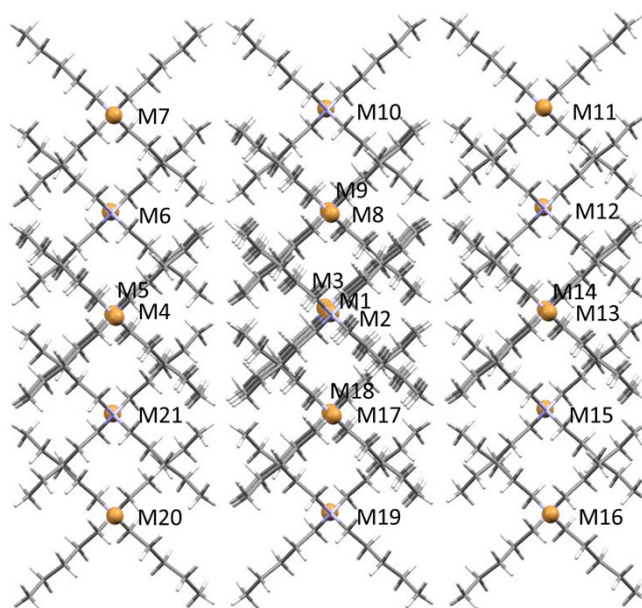

Figure S24. Supramolecular cluster of **13a**.

Table S24. Symmetry codes, contact area ( $C_{M1...MN}$ , in  $\text{\AA}^2$ ) and energetic data ( $G_{M1...MN}$ , in  $\text{kcal mol}^{-1}$ ) for the supramolecular cluster of salt **13a**.

| Dimer    | Cation symmetry code | Anion symmetry code | $C_{M1...MN}$ | $G_{M1...MN}$ | $NC_{M1...MN}$ | $NG_{M1...MN}$ |
|----------|----------------------|---------------------|---------------|---------------|----------------|----------------|
| M1       | x,y,z                | x,y,z               |               |               |                |                |
| M1...M2  | x,y,1+z              | x,y,1+z             | 7.75          | -16.03        | 0.28           | 2.14           |
| M1...M3  | x,y,-1+z             | x,y,-1+z            | 7.75          | -16.03        | 0.28           | 2.14           |
| M1...M4  | 1-x,-y,2-z           | 1-x,-y,2-z          | 2.99          | -0.71         | 0.11           | 0.09           |
| M1...M5  | 1-x,-y,1-z           | 1-x,-y,1-z          | 2.99          | -4.22         | 0.11           | 0.56           |
| M1...M6  | -1/2+x,-1/2+y,z      | -1/2+x,-1/2+y,z     | 19.23         | 0.00          | 0.71           | 0.00           |
| M1...M7  | -x,-y,2-z            | -x,-y,2-z           | 12.84         | -0.82         | 0.47           | 0.11           |
| M1...M8  | 1/2-x,1/2-y,2-z      | 1/2-x,1/2-y,2-z     | 65.21         | -5.89         | 2.39           | 0.79           |
| M1...M9  | 1/2-x,1/2-y,1-z      | 1/2-x,1/2-y,1-z     | 94.21         | -43.27        | 3.46           | 5.78           |
| M1...M10 | -1+x,y,z             | -1+x,y,z            | 35.34         | -0.74         | 1.30           | 0.10           |
| M1...M11 | -x,1-y,1-z           | -x,1-y,1-z          | 12.84         | -2.00         | 0.47           | 0.27           |
| M1...M12 | -1/2+x,1/2+y,z       | -1/2+x,1/2+y,z      | 19.23         | -2.00         | 0.71           | 0.27           |
| M1...M13 | 1-x,1-y,2-z          | 1-x,1-y,2-z         | 2.99          | -0.71         | 0.11           | 0.09           |
| M1...M14 | 1-x,1-y,1-z          | 1-x,1-y,1-z         | 2.99          | -4.22         | 0.11           | 0.56           |
| M1...M15 | 1/2+x,1/2+y,z        | 1/2+x,1/2+y,z       | 19.23         | 0.00          | 0.71           | 0.00           |
| M1...M16 | 2-x,1-y,2-z          | 2-x,1-y,2-z         | 12.84         | -0.82         | 0.47           | 0.11           |
| M1...M17 | 1.5-x,1/2-y,2-z      | 1.5-x,1/2-y,2-z     | 65.21         | -5.89         | 2.39           | 0.79           |
| M1...M18 | 1.5-x,1/2-y,1-z      | 1.5-x,1/2-y,1-z     | 94.21         | -43.27        | 3.46           | 5.78           |
| M1...M19 | 1+x,y,z              | 1+x,y,z             | 35.34         | -0.74         | 1.30           | 0.10           |
| M1...M20 | 2-x,-y,1-z           | 2-x,-y,1-z          | 12.84         | -2.00         | 0.47           | 0.27           |
| M1...M21 | 1/2+x,-1/2+y,z       | 1/2+x,-1/2+y,z      | 19.23         | -0.31         | 0.71           | 0.04           |
| Total    |                      |                     | 545.26        | -149.65       | 20.00          | 20.00          |

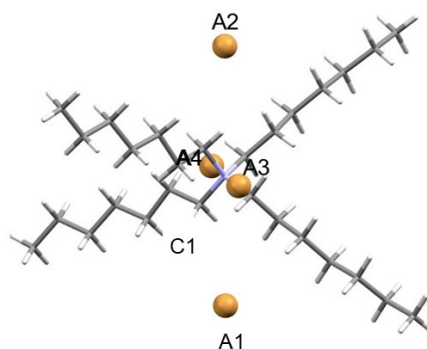

Figure S25. Anions that present contact area with C1 cation of salt **15a**.

Table S25. Symmetry codes, contact area, absolute stabilization energies and N...X distances of each C1...A pair of salt **15a**.

| C1...A  | Anion symmetry code <sup>a</sup> | $C_{C1...A}$ <sup>b</sup> | $G_{C1...A}$ <sup>c</sup> | $ G_{C1...A1} - G_{C1...A} $ <sup>d</sup> | N...X <sup>e</sup> |
|---------|----------------------------------|---------------------------|---------------------------|-------------------------------------------|--------------------|
| C1...A1 | 1/2+x,1/2-y,z                    | 11.35                     | 2341360.99                | 0.00                                      | 4.8996             |
| C1...A2 | 1/2+x,1.5-y,z                    | 11.35                     | 2341360.99                | 0.00                                      | 4.8996             |
| C1...A3 | 1+x,y,z                          | 11.32                     | 2341360.94                | 0.05                                      | 4.9045             |
| C1...A4 | x,y,z                            | 11.32                     | 2341360.94                | 0.05                                      | 4.9045             |

<sup>a</sup>Cation C1 symmetry code: x,y,z. <sup>b</sup>Contact area between C1 and each considered anion, in  $\text{\AA}^2$ . <sup>c</sup>Absolute energy of each C1...A pair, in a.u.; <sup>d</sup>Difference of absolute energies between the most stable pair and each considered pair, in  $\text{kcal mol}^{-1}$ . <sup>e</sup>Distance, in  $\text{\AA}$ .

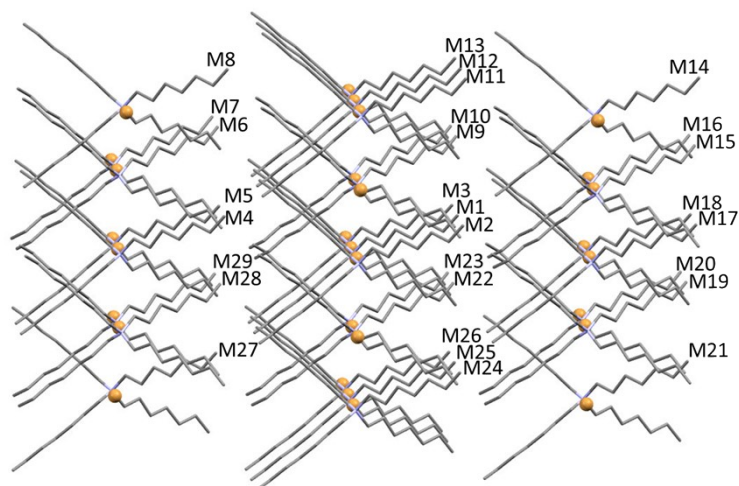

Figure S26. Supramolecular cluster of **15a**. Hydrogens were omitted for clarity.

Table S26. Symmetry codes, contact area ( $C_{M1...MN}$ , in  $\text{\AA}^2$ ) and energetic data ( $G_{M1...MN}$ , in  $\text{kcal mol}^{-1}$ ) for the supramolecular cluster of salt **15a**.

| Dimer    | Cation symmetry code | Anion symmetry code | $C_{M1...MN}$ | $G_{M1...MN}$ | $NC_{M1...MN}$ | $NG_{M1...MN}$ |
|----------|----------------------|---------------------|---------------|---------------|----------------|----------------|
| M1       | x,y,z                | 1/2+x,1/2-y,z       |               |               |                |                |
| M1...M2  | x,1+y,z              | 1/2+x,1.5-y,z       | 31.14         | -19.35        | 1.19           | 3.05           |
| M1...M3  | x,-1+y,z             | 1/2+x,-1/2-y,z      | 31.14         | -19.35        | 1.19           | 3.05           |
| M1...M4  | x,1/2+y,1/2+z        | 1/2+x,-y,1/2+z      | 9.28          | -0.47         | 0.35           | 0.07           |
| M1...M5  | x,-1/2+y,1/2+z       | 1/2+x,-y,1/2+z      | 9.28          | -0.18         | 0.35           | 0.03           |
| M1...M6  | -1/2+x,1-y,1/2+z     | x,-1/2+y,1/2+z      | 9.95          | -0.06         | 0.38           | 0.01           |
| M1...M7  | -1/2+x,-y,1/2+z      | x,-1.5+y,1/2+z      | 8.42          | -0.61         | 0.32           | 0.10           |
| M1...M8  | -1+x,1/2+y,1/2+z     | -1/2+x,2-y,1/2+z    | 8.56          | -1.27         | 0.33           | 0.20           |
| M1...M9  | -1/2+x,1.5-y,z       | x,1+y,z             | 98.23         | -12.21        | 3.75           | 1.92           |
| M1...M10 | -1/2+x,1/2-y,z       | x,y,z               | 120.87        | -48.49        | 4.62           | 7.64           |
| M1...M11 | -1+x,1+y,z           | -1/2+x,1.5-y,z      | 12.16         | -2.05         | 0.46           | 0.32           |
| M1...M12 | -1+x,y,z             | -1/2+x,1/2-y,z      | 19.72         | 0.80          | 0.75           | -0.13          |
| M1...M13 | -1+x,-1+y,z          | -1/2+x,-1/2-y,z     | 12.02         | -2.25         | 0.46           | 0.35           |
| M1...M14 | -1+x,1/2+y,-1/2+z    | -1/2+x,2-y,-1/2+z   | 8.56          | -1.27         | 0.33           | 0.20           |
| M1...M15 | -1/2+x,2-y,-1/2+z    | x,1/2+y,-1/2+z      | 8.42          | -0.61         | 0.32           | 0.10           |
| M1...M16 | -1/2+x,1-y,-1/2+z    | x,-1/2+y,-1/2+z     | 9.95          | -0.06         | 0.38           | 0.01           |
| M1...M17 | x,1/2+y,-1/2+z       | 1/2+x,1-y,-1/2+z    | 9.28          | -0.18         | 0.35           | 0.03           |
| M1...M18 | x,-1/2+y,-1/2+z      | 1/2+x,-y,-1/2+z     | 9.28          | -0.47         | 0.35           | 0.07           |
| M1...M19 | 1/2+x,1-y,-1/2+z     | 1+x,-1/2+y,-1/2+z   | 9.95          | -0.03         | 0.38           | 0.00           |
| M1...M20 | 1/2+x,-y,-1/2+z      | 1+x,-1.5+y,-1/2+z   | 8.42          | -0.82         | 0.32           | 0.13           |
| M1...M21 | 1+x,-1/2+y,-1/2+z    | 1.5+x,1-y,-1/2+z    | 8.56          | -1.92         | 0.33           | 0.30           |
| M1...M22 | 1/2+x,1.5-y,z        | 1+x,1+y,z           | 98.23         | -12.21        | 3.75           | 1.92           |
| M1...M23 | 1/2+x,1/2-y,z        | 1+x,y,z             | 120.87        | -48.49        | 4.62           | 7.64           |
| M1...M24 | 1+x,1+y,z            | 1.5+x,1.5-y,z       | 12.02         | -2.25         | 0.46           | 0.35           |
| M1...M25 | 1+x,y,z              | 1.5+x,1/2-y,z       | 19.72         | 0.80          | 0.75           | -0.13          |
| M1...M26 | 1+x,-1+y,z           | 1.5+x,-1/2-y,z      | 12.16         | -2.05         | 0.46           | 0.32           |
| M1...M27 | 1+x,-1/2+y,1/2+z     | 1.5+x,1-y,1/2+z     | 8.56          | -1.92         | 0.33           | 0.30           |
| M1...M28 | 1/2+x,2-y,1/2+z      | 1+x,1/2+y,1/2+z     | 8.42          | -0.82         | 0.32           | 0.13           |
| M1...M29 | 1/2+x,1-y,1/2+z      | 1+x,-1/2+y,1/2+z    | 9.95          | -0.03         | 0.38           | 0.00           |
| Total    |                      |                     | 733.12        | -177.83       | 28.00          | 28.00          |

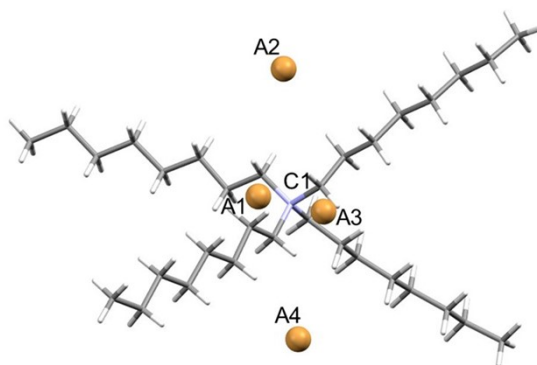

Figure S27. Anions that present contact area with C1 cation of salt **16a**.

Table S27. Symmetry codes, contact area, absolute stabilization energies and N...X distances of each C1...A pair of salt **16a**.

| C1...A  | Anion symmetry code <sup>a</sup> | $C_{C1...A}$ <sup>b</sup> | $G_{C1...A}$ <sup>c</sup> | $ G_{C1...A1} - G_{C1...A} $ <sup>d</sup> | N...X <sup>e</sup> |
|---------|----------------------------------|---------------------------|---------------------------|-------------------------------------------|--------------------|
| C1...A1 | $x,y,z$                          | 11.34                     | -3888.33859574            | 0.00                                      | 4.8521             |
| C1...A2 | $1+y,1-x,1-z$                    | 11.34                     | -3888.33859574            | 0.00                                      | 4.8521             |
| C1...A3 | $1+x,y,z$                        | 11.34                     | -3888.33859574            | 0.00                                      | 4.8521             |
| C1...A4 | $1+y,-x,1-z$                     | 11.34                     | -3888.33859574            | 0.00                                      | 4.8521             |

<sup>a</sup>Cation C1 symmetry code:  $x,y,z$ . <sup>b</sup>Contact area between C1 and each considered anion, in  $\text{\AA}^2$ . <sup>c</sup>Absolute energy of each C1...A pair, in a.u.; <sup>d</sup>Difference of absolute energies between the most stable pair and each considered pair, in  $\text{kcal mol}^{-1}$ . <sup>e</sup>Distance, in  $\text{\AA}$ .

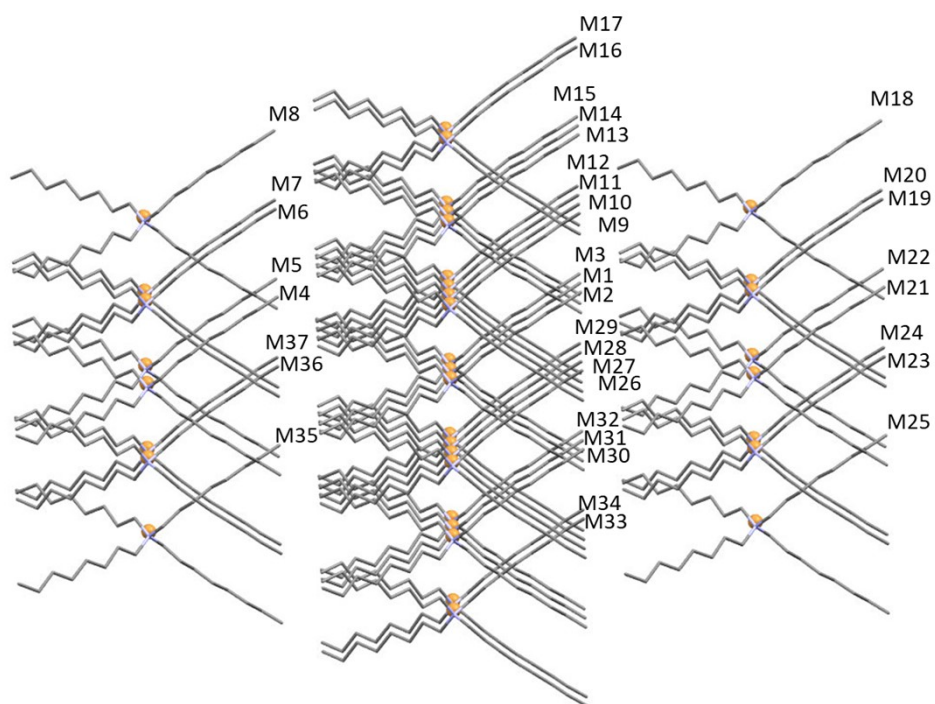

Figure S28. Supramolecular cluster of **16a**. Hydrogens were omitted for clarity.

Table S28. Symmetry codes, contact area ( $C_{M1...MN}$ , in  $\text{\AA}^2$ ) and energetic data ( $G_{M1...MN}$ , in kcal mol $^{-1}$ ) for the supramolecular cluster of salt **16a**.

| Dimer    | Cation symmetry code | Anion symmetry code | $C_{M1...MN}$ | $G_{M1...MN}$ | $NC_{M1...MN}$ | $NG_{M1...MN}$ |
|----------|----------------------|---------------------|---------------|---------------|----------------|----------------|
| M1       | x,y,z                | x,y,z               |               |               |                |                |
| M1...M2  | 1+x,y,z              | 1+x,y,z             | 36.21         | -19.57        | 1.54           | 4.96           |
| M1...M3  | -1+x,y,z             | -1+x,y,z            | 36.21         | -19.57        | 1.54           | 4.96           |
| M1...M4  | 1+x,y,1+z            | 1+x,y,1+z           | 8.79          | -0.31         | 0.37           | 0.08           |
| M1...M5  | -1+x,y,1+z           | -1+x,y,1+z          | 8.79          | -0.44         | 0.37           | 0.11           |
| M1...M6  | 1.5+y,-1/2+x,2-z     | 1+y,1-x,2-z         | 12.8          | -0.13         | 0.54           | 0.03           |
| M1...M7  | 1/2+y,-1/2+x,2-z     | y,1-x,2-z           | 6.25          | 0.04          | 0.27           | -0.01          |
| M1...M8  | x,1+y,1+z            | x,1+y,1+z           | 8.79          | -0.11         | 0.37           | 0.03           |
| M1...M9  | 2.5+y,-1/2+x,1-z     | 2+y,1-x,1-z         | 0.01          | -2.34         | 0.00           | 0.59           |
| M1...M10 | 1.5+y,-1/2+x,1-z     | 1+y,1-x,1-z         | 128.46        | -22.59        | 5.46           | 5.72           |
| M1...M11 | 1/2+y,-1/2+x,1-z     | y,1-x,1-z           | 128.46        | -22.59        | 5.46           | 5.72           |
| M1...M12 | -1/2+y,-1/2+x,1-z    | -1+y,1-x,1-z        | 0.01          | -2.34         | 0.00           | 0.59           |
| M1...M13 | 1+x,1+y,z            | 1+x,1+y,z           | 16.06         | -1.89         | 0.68           | 0.48           |
| M1...M14 | x,1+y,z              | x,1+y,z             | 24.87         | 0.50          | 1.06           | -0.13          |
| M1...M15 | -1+x,1+y,z           | -1+x,1+y,z          | 16.06         | -1.91         | 0.68           | 0.48           |
| M1...M16 | 1.5+y,1/2+x,1-z      | 1+y,2-x,1-z         | 0.01          | 1.09          | 0.00           | -0.28          |
| M1...M17 | 1/2+y,1/2+x,1-z      | y,2-x,1-z           | 0.01          | 1.09          | 0.00           | -0.28          |
| M1...M18 | x,1+y,-1+z           | x,1+y,-1+z          | 8.79          | -0.01         | 0.37           | 0.00           |
| M1...M19 | 1.5+y,-1/2+x,-z      | 1+y,1-x,-z          | 6.25          | 0.04          | 0.27           | -0.01          |
| M1...M20 | 1/2+y,-1/2+x,-z      | y,1-x,-z            | 12.8          | -0.13         | 0.54           | 0.03           |
| M1...M21 | 1+x,y,-1+z           | 1+x,y,-1+z          | 8.79          | -0.31         | 0.37           | 0.08           |
| M1...M22 | -1+x,y,-1+z          | -1+x,y,-1+z         | 8.79          | -0.44         | 0.37           | 0.11           |
| M1...M23 | 1.5+y,-1.5+x,-z      | 1+y,-x,-z           | 12.8          | -0.22         | 0.54           | 0.06           |
| M1...M24 | 1/2+y,-1.5+x,-z      | y,-x,-z             | 6.25          | 0.14          | 0.27           | -0.04          |
| M1...M25 | x,-1+y,-1+z          | x,-1+y,-1+z         | 8.79          | -0.11         | 0.37           | 0.03           |
| M1...M26 | 2.5+y,-1.5+x,1-z     | 2+y,-x,1-z          | 0.01          | -2.43         | 0.00           | 0.61           |
| M1...M27 | 1.5+y,-1.5+x,1-z     | 1+y,-x,1-z          | 128.46        | -21.95        | 5.46           | 5.56           |
| M1...M28 | 1/2+y,-1.5+x,1-z     | y,-x,1-z            | 128.46        | -21.95        | 5.46           | 5.56           |
| M1...M29 | -1/2+y,-1.5+x,1-z    | -1+y,-x,1-z         | 0.01          | -2.43         | 0.00           | 0.61           |
| M1...M30 | 1+x,-1+y,z           | 1+x,-1+y,z          | 16.06         | -1.91         | 0.68           | 0.48           |
| M1...M31 | x,-1+y,z             | x,-1+y,z            | 24.87         | 0.50          | 1.06           | -0.13          |
| M1...M32 | -1+x,-1+y,z          | -1+x,-1+y,z         | 16.06         | -1.89         | 0.68           | 0.48           |
| M1...M33 | 1.5+y,-2.5+x,1-z     | 1+y,-1-x,1-z        | 0.01          | 1.06          | 0.00           | -0.27          |
| M1...M34 | 1/2+y,-2.5+x,1-z     | y,-1-x,1-z          | 0.01          | 1.06          | 0.00           | -0.27          |
| M1...M35 | x,-1+y,1+z           | x,-1+y,1+z          | 8.79          | -0.01         | 0.37           | 0.00           |
| M1...M36 | 1.5+y,-1.5+x,2-z     | 1+y,-x,2-z          | 6.25          | 0.14          | 0.27           | -0.04          |
| M1...M37 | 1/2+y,-1.5+x,2-z     | y,-x,2-z            | 12.8          | -0.22         | 0.54           | 0.06           |
| Total    |                      |                     | 846.84        | -142.17       | 36.00          | 36.00          |

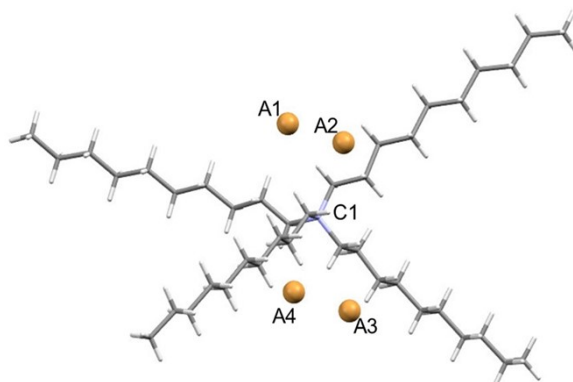

Figure S29. Anions that present contact area with C1 cation of salt **17a**.

Table S29. Symmetry codes, contact area, absolute stabilization energies and N...X distances of each C1...A pair of salt **17a**.

| C1...A  | Anion symmetry code <sup>a</sup>  | $C_{C1...A}$ <sup>b</sup> | $G_{C1...A}$ <sup>c</sup> | $\frac{ G_{C1...A1} - G_{C1...A} }{G_{C1...A1}}$ <sup>d</sup> | N...X <sup>e</sup> |
|---------|-----------------------------------|---------------------------|---------------------------|---------------------------------------------------------------|--------------------|
| C1...A1 | $\frac{1}{2}+x, \frac{1}{2}+y, z$ | 11.16                     | -2637173.74               | 0.00                                                          | 4.827              |
| C1...A2 | $\frac{1}{2}+x, \frac{1}{2}+y, z$ | 11.06                     | -2637173.71               | 0.03                                                          | 4.820              |
| C1...A3 | $1+x, y, z$                       | 11.10                     | -2637173.69               | 0.05                                                          | 4.831              |
| C1...A4 | $x, y, z$                         | 11.04                     | -2637173.70               | 0.05                                                          | 4.838              |

<sup>a</sup>Cation C1 symmetry code:  $x, y, z$ . <sup>b</sup>Contact area between C1 and each considered anion, in Å<sup>2</sup>. <sup>c</sup>Absolute energy of each C1...A pair, in a.u.; <sup>d</sup>Difference of absolute energies between the most stable pair and each considered pair, in kcal mol<sup>-1</sup>. <sup>e</sup>Distance, in Å.

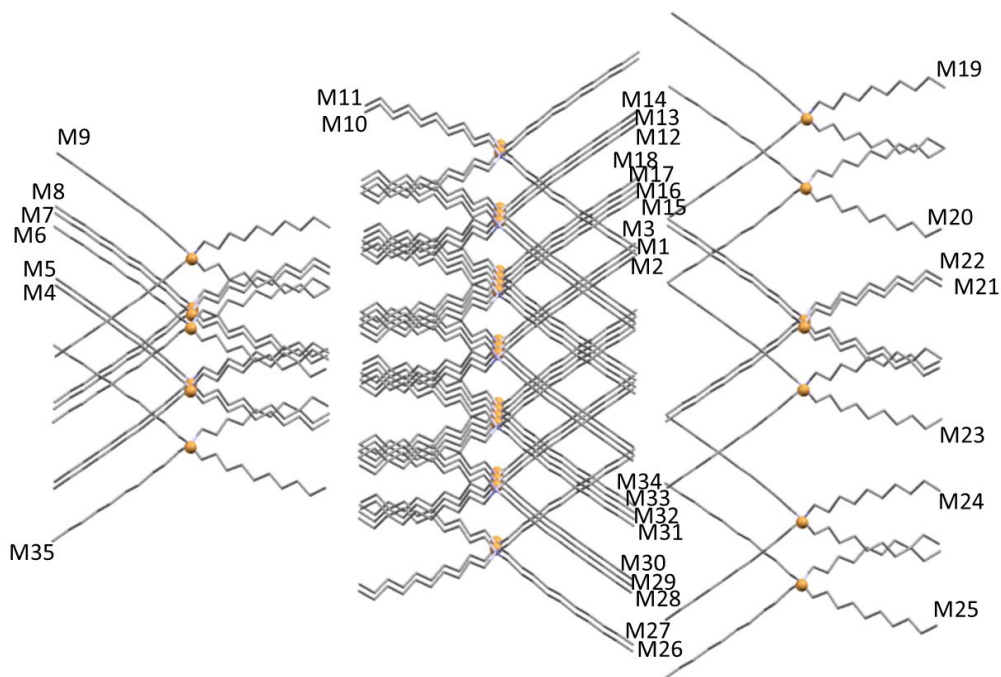

Figure S30. Supramolecular cluster of **17a**. Hydrogens were omitted for clarity.

Table S30. Symmetry codes, contact area ( $C_{M1...MN}$ , in  $\text{\AA}^2$ ) and energetic data ( $G_{M1...MN}$ , in kcal mol $^{-1}$ ) for the supramolecular cluster of salt **17a**.

| Dimer    | Cation symmetry code | Anion symmetry code | $C_{M1...MN}$ | $G_{M1...M_N}$ | $NC_{M1...MN}$ | $NG_{M1...MN}$ |
|----------|----------------------|---------------------|---------------|----------------|----------------|----------------|
| M1       | x,y,z                | 1/2+x,1/2+y,z       |               |                |                |                |
| M1...M2  | 1/2+x,-1/2+y,z       | 1+x,y,z             | 36.45         | -20.66         | 1.21           | 3.61           |
| M1...M3  | -1/2+x,1/2+y,z       | x,1+y,z             | 36.45         | -20.66         | 1.21           | 3.61           |
| M1...M4  | 2-x,-y,1-z           | 1.5-x,-1/2-y,1-z    | 17.71         | -0.10          | 0.59           | 0.02           |
| M1...M5  | 1.5-x,1/2-y,1-z      | 1-x,-y,1-z          | 4.61          | -2.27          | 0.15           | 0.40           |
| M1...M6  | 1+x,-y,1/2+z         | 2.5-x,-1/2-y,1-z    | 7.84          | -0.47          | 0.26           | 0.08           |
| M1...M7  | x,1-y,1/2+z          | 1.5-x,1/2-y,1-z     | 6.3           | -1.17          | 0.21           | 0.20           |
| M1...M8  | -1/2+x,1.5-y,1/2+z   | 1-x,1-y,1-z         | 10.71         | -1.31          | 0.36           | 0.23           |
| M1...M9  | 2.5-x,1/2-y,1-z      | 2-x,-y,1-z          | 12.58         | -1.43          | 0.42           | 0.25           |
| M1...M10 | 2.5-x,1/2+y,1/2-z    | 1+x,1+y,z           | 10.47         | -0.36          | 0.35           | 0.06           |
| M1...M11 | 2-x,1+y,1/2-z        | 1/2+x,1.5+y,z       | 12.11         | -0.50          | 0.40           | 0.09           |
| M1...M12 | 1+x,y,z              | 1.5+x,1/2+y,z       | 19.22         | -3.51          | 0.64           | 0.61           |
| M1...M13 | 1/2+x,1/2+y,z        | 1+x,1+y,z           | 25.54         | -0.57          | 0.85           | 0.10           |
| M1...M14 | x,1+y,z              | 1/2+x,1.5+y,z       | 19.61         | -3.74          | 0.65           | 0.65           |
| M1...M15 | 2.5-x,-1/2+y,1/2-z   | 1+x,y,z             | 10.47         | -0.36          | 0.35           | 0.06           |
| M1...M16 | 2-x,y,1/2-z          | 1/2+x,1/2+y,z       | 147.00        | -27.40         | 4.89           | 4.79           |
| M1...M17 | 1.5-x,1/2+y,1/2-z    | x,1+y,z             | 147.11        | -28.01         | 4.90           | 4.90           |
| M1...M18 | 1-x,1+y,1/2-z        | -1/2+x,1.5+y,z      | 10.98         | -3.84          | 0.37           | 0.67           |
| M1...M19 | 2-x,2-y,-z           | 1.5-x,1.5-y,-z      | 8.57          | -0.66          | 0.29           | 0.12           |
| M1...M20 | 1/2+x,1.5-y,-1/2+z   | 2-x,1-y,-z          | 10.71         | -1.31          | 0.36           | 0.23           |
| M1...M21 | x,1-y,-1/2+z         | 1.5-x,1/2-y,-z      | 10.55         | -1.05          | 0.35           | 0.18           |
| M1...M22 | 1/2+x,1/2-y,-1/2+z   | 2-x,-y,-z           | 6.30          | -1.17          | 0.21           | 0.20           |
| M1...M23 | 1.5-x,1/2-y,-z       | 1-x,-y,-z           | 17.86         | -1.43          | 0.59           | 0.25           |
| M1...M24 | 1-x,-y,-z            | 1/2-x,-1/2-y,-z     | 8.95          | -0.89          | 0.30           | 0.16           |
| M1...M25 | -1+x,-y,-1/2+z       | 1/2-x,-1/2-y,-z     | 7.84          | -0.47          | 0.26           | 0.08           |
| M1...M26 | 1-x,-1+y,1/2-z       | -1/2+x,-1/2+y,z     | 10.98         | -3.84          | 0.37           | 0.67           |
| M1...M27 | 1/2-x,-1/2+y,1/2-z   | -1+x,y,z            | 11.00         | -0.40          | 0.37           | 0.07           |
| M1...M28 | x,-1+y,z             | 1/2+x,-1/2+y,z      | 19.61         | -3.74          | 0.65           | 0.65           |
| M1...M29 | -1/2+x,-1/2+y,z      | x,y,z               | 25.54         | -0.57          | 0.85           | 0.10           |
| M1...M30 | -1+x,y,z             | -1/2+x,1/2+y,z      | 19.22         | -3.51          | 0.64           | 0.61           |
| M1...M31 | 2-x,-1+y,1/2-z       | 1/2+x,-1/2+y,z      | 12.11         | -0.50          | 0.40           | 0.09           |
| M1...M32 | 1.5-x,-1/2+y,1/2-z   | x,y,z               | 147.05        | -28.77         | 4.90           | 5.03           |
| M1...M33 | 1-x,y,1/2-z          | -1/2+x,1/2+y,z      | 148.37        | -28.28         | 4.94           | 4.95           |
| M1...M34 | 1/2-x,1/2+y,1/2-z    | -1+x,1+y,z          | 11.00         | -0.40          | 0.37           | 0.07           |
| M1...M35 | -1/2+x,1/2-y,1/2+z   | 1-x,-y,1-z          | 10.55         | -1.05          | 0.35           | 0.18           |
| Total    |                      |                     | 1021.37       | -194.41        | 34.00          | 34.00          |

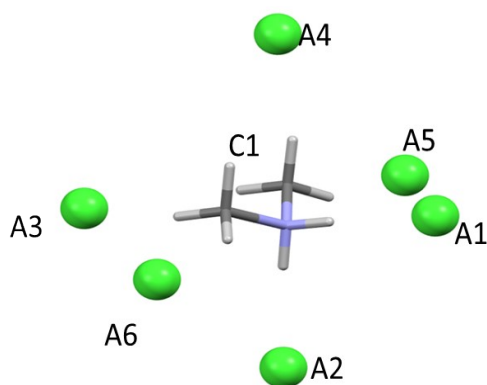

Figure S31. Anions that present contact area with C1 cation of salt **4b**.

Table S31. Symmetry codes, contact area, absolute stabilization energies and N...X distances of each C1...A pair of salt **4b**.

| C1...A  | Anion symmetry code <sup>a</sup> | C <sub>C1...A</sub> <sup>b</sup> | G <sub>C1...A</sub> <sup>c</sup> | G <sub>C1...A1</sub> - G <sub>C1...A</sub>   <sup>d</sup> | N...X <sup>e</sup> |
|---------|----------------------------------|----------------------------------|----------------------------------|-----------------------------------------------------------|--------------------|
| C1...A1 | x,y,z                            | 8.38                             | -373880.05                       | 0.00                                                      | 3.10               |
| C1...A2 | ½-x,1/2+y,-z                     | 7.60                             | -373879.82                       | 0.23                                                      | 3.10               |
| C1...A3 | -1/2+x,1/2-y,-z                  | 6.29                             | -373860.05                       | 20.00                                                     | 4.14               |
| C1...A4 | ½-x,-1/2+y,-z                    | 7.41                             | -373859.48                       | 20.57                                                     | 4.15               |
| C1...A5 | ½-x,1/2-y,1/2+z                  | 4.32                             | -373845.09                       | 34.95                                                     | 4.94               |
| C1...A6 | ½-x,1/2-y,-1/2+z                 | 4.32                             | -373845.09                       | 34.95                                                     | 4.94               |

<sup>a</sup>Cation C1 symmetry code: x,y,z. <sup>b</sup>Contact area between C1 and each considered anion, in Å<sup>2</sup>. <sup>c</sup>Absolute energy of each C1...A pair, in a.u.; <sup>d</sup>Difference of absolute energies between the most stable pair and each considered pair, in kcal mol<sup>-1</sup>. <sup>e</sup>Distance, in Å.

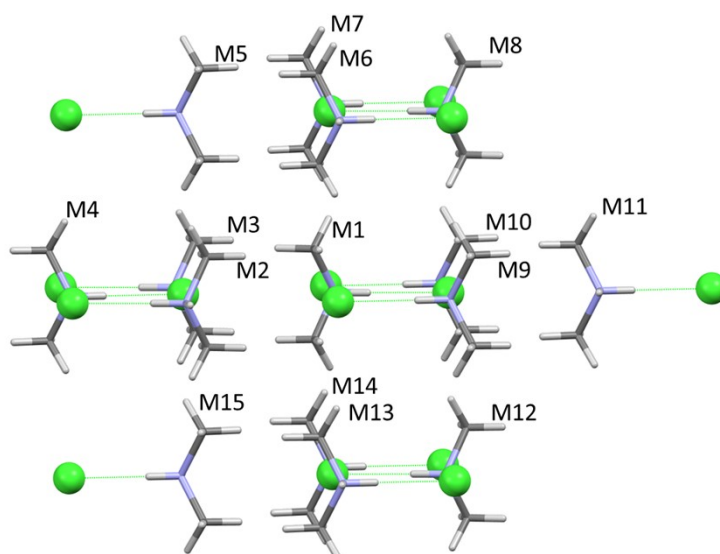

Figure S32. Supramolecular cluster of **4b**.

Table S32. Symmetry codes, contact area (C<sub>M1...MN</sub>, in Å<sup>2</sup>) and energetic data (G<sub>M1...MN</sub>, in kcal mol<sup>-1</sup>) for the supramolecular cluster of salt **4b**.

| Dimer    | Cation symmetry code | Anion symmetry code | C <sub>M1...MN</sub> | G <sub>M1...MN</sub> | NC <sub>M1...MN</sub> | NG <sub>M1...MN</sub> |
|----------|----------------------|---------------------|----------------------|----------------------|-----------------------|-----------------------|
| M1       | x,y,z                | x,y,z               |                      |                      |                       |                       |
| M1...M2  | -x,-y,z              | -x,-y,z             | 7.11                 | 3.06                 | 0.65                  | -0.44                 |
| M1...M3  | -x,1-y,z             | -x,1-y,z            | 12.24                | 5.72                 | 1.12                  | -0.83                 |
| M1...M4  | -0.5+x,0.5-y,-z      | -0.5+x,0.5-y,-z     | 7.41                 | -13.65               | 0.68                  | 1.98                  |
| M1...M5  | -x,y,0.5-z           | -x,y,0.5-z          | 8.49                 | 3.11                 | 0.78                  | -0.45                 |
| M1...M6  | x,-y,0.5-z           | x,-y,0.5-z          | 5.88                 | 8.64                 | 0.54                  | -1.25                 |
| M1...M7  | x,1-y,0.5-z          | x,1-y,0.5-z         | 8.76                 | 7.73                 | 0.80                  | -1.12                 |
| M1...M8  | 0.5-x,0.5-y,0.5+z    | 0.5-x,0.5-y,0.5+z   | 15.24                | -20.07               | 1.40                  | 2.91                  |
| M1...M9  | 0.5-x,-0.5+y,-z      | 0.5-x,-0.5+y,-z     | 21.01                | -38.40               | 1.92                  | 5.57                  |
| M1...M10 | 0.5-x,0.5+y,-z       | 0.5-x,0.5+y,-z      | 21.01                | -38.40               | 1.92                  | 5.57                  |
| M1...M11 | 0.5+x,0.5-y,-z       | 0.5+x,0.5-y,-z      | 7.41                 | -13.65               | 0.68                  | 1.98                  |
| M1...M12 | 0.5-x,0.5-y,-0.5+z   | 0.5-x,0.5-y,-0.5+z  | 15.24                | -20.07               | 1.40                  | 2.91                  |
| M1...M13 | x,-y,-0.5-z          | x,-y,-0.5-z         | 5.88                 | 8.64                 | 0.54                  | -1.25                 |
| M1...M14 | x,1-y,-0.5-z         | x,1-y,-0.5-z        | 8.76                 | 7.73                 | 0.80                  | -1.12                 |
| M1...M15 | -x,y,-0.5-z          | -x,y,-0.5-z         | 8.49                 | 3.11                 | 0.78                  | -0.45                 |
| Total    |                      |                     | 152.93               | -96.54               | 14.00                 | 14.00                 |



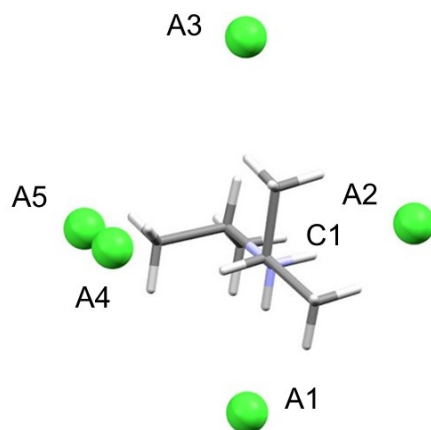

Figure S33. Anions that present contact area with C1 cation of salt **5b**.

Table S33. Symmetry codes, contact area, absolute stabilization energies and N $\cdots$ X distances of each C1 $\cdots$ A pair of salt **5b**.

| C1 $\cdots$ A  | Anion symmetry code <sup>a</sup>            | C <sub>C1<math>\cdots</math>A</sub> <sup>b</sup> | G <sub>C1<math>\cdots</math>A</sub> <sup>c</sup> | G <sub>C1<math>\cdots</math>A1</sub> - G <sub>C1<math>\cdots</math>A</sub>   <sup>d</sup> | N $\cdots$ X <sup>e</sup> |
|----------------|---------------------------------------------|--------------------------------------------------|--------------------------------------------------|-------------------------------------------------------------------------------------------|---------------------------|
| C1 $\cdots$ A1 | <i>x,y,z</i>                                | 10.14                                            | -472462.44                                       | 0.00                                                                                      | 3.1690                    |
| C1 $\cdots$ A2 | 1.5- <i>x</i> ,1/2+ <i>y</i> ,1/2- <i>z</i> | 9.46                                             | -472461.84                                       | 0.60                                                                                      | 3.1759                    |
| C1 $\cdots$ A3 | <i>x</i> ,1+ <i>y</i> , <i>z</i>            | 6.72                                             | -472434.57                                       | 27.87                                                                                     | 4.7631                    |
| C1 $\cdots$ A4 | 2- <i>x</i> ,1- <i>y</i> ,1- <i>z</i>       | 6.24                                             | -472434.03                                       | 28.41                                                                                     | 4.9022                    |
| C1 $\cdots$ A5 | 1- <i>x</i> ,1- <i>y</i> ,1- <i>z</i>       | 5.15                                             | -472419.99                                       | 42.45                                                                                     | 6.0473                    |

<sup>a</sup>Cation C1 symmetry code: *x,y,z*. <sup>b</sup>Contact area between C1 and each considered anion, in Å<sup>2</sup>. <sup>c</sup>Absolute energy of each C1 $\cdots$ A pair, in a.u.; <sup>d</sup>Difference of absolute energies between the most stable pair and each considered pair, in kcal mol<sup>-1</sup>. <sup>e</sup>Distance, in Å.

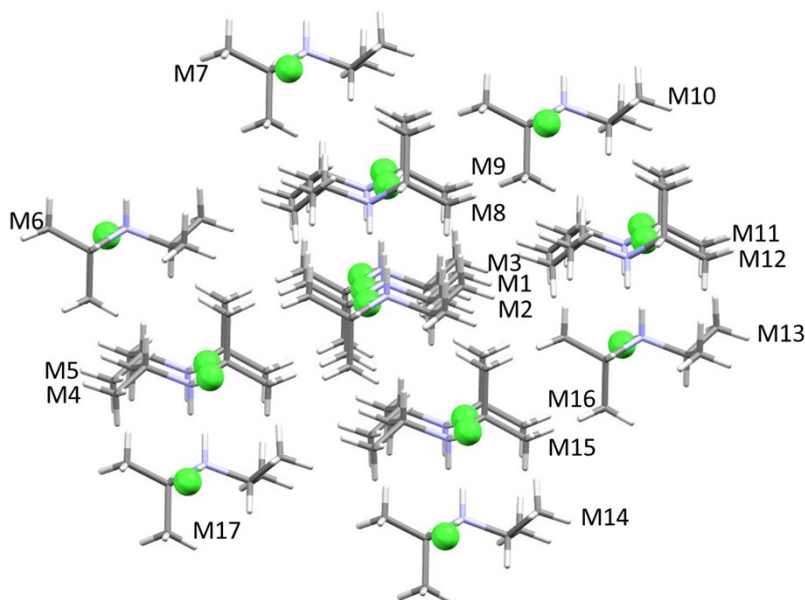

Figure S34. Supramolecular cluster of **5b**.

Table S34. Symmetry codes, contact area ( $C_{M1...MN}$ , in  $\text{\AA}^2$ ) and energetic data ( $G_{M1...MN}$ , in kcal mol $^{-1}$ ) for the supramolecular cluster of salt **5b**.

| Dimer    | Cation symmetry code | Anion symmetry code | $C_{M1...MN}$ | $G_{M1...MN}$ | $NC_{M1...MN}$ | $NG_{M1...MN}$ |
|----------|----------------------|---------------------|---------------|---------------|----------------|----------------|
| M1       | x,y,z                | x,y,z               |               |               |                |                |
| M1...M2  | x,1+y,z              | x,1+y,z             | 6.72          | -9.34         | 0.49           | 1.84           |
| M1...M3  | x,-1+y,z             | x,-1+y,z            | 6.72          | -9.34         | 0.49           | 1.84           |
| M1...M4  | 1-x,2-y,1-z          | 1-x,2-y,1-z         | 6.77          | 0.14          | 0.50           | -0.03          |
| M1...M5  | 1-x,1-y,1-z          | 1-x,1-y,1-z         | 24.04         | -12.56        | 1.76           | 2.47           |
| M1...M6  | -1+x,y,z             | -1+x,y,z            | 11.08         | 2.19          | 0.81           | -0.43          |
| M1...M7  | -1/2+x,1.5-y,-1/2+z  | -1/2+x,1.5-y,-1/2+z | 0.64          | -1.37         | 0.05           | 0.27           |
| M1...M8  | 1.5-x,1/2+y,1/2-z    | 1.5-x,1/2+y,1/2-z   | 30.61         | -13.31        | 2.24           | 2.62           |
| M1...M9  | 1.5-x,-1/2+y,1/2-z   | 1.5-x,-1/2+y,1/2-z  | 30.61         | -13.31        | 2.24           | 2.62           |
| M1...M10 | 1/2+x,1.5-y,-1/2+z   | 1/2+x,1.5-y,-1/2+z  | 8.15          | -1.95         | 0.60           | 0.38           |
| M1...M11 | 2.5-x,1/2+y,1/2-z    | 2.5-x,1/2+y,1/2-z   | 7.62          | 0.33          | 0.56           | -0.06          |
| M1...M12 | 2.5-x,-1/2+y,1/2-z   | 2.5-x,-1/2+y,1/2-z  | 7.62          | 0.33          | 0.56           | -0.06          |
| M1...M13 | 1+x,y,z              | 1+x,y,z             | 11.08         | 2.19          | 0.81           | -0.43          |
| M1...M14 | 1/2+x,1.5-y,1/2+z    | 1/2+x,1.5-y,1/2+z   | 0.64          | -1.37         | 0.05           | 0.27           |
| M1...M15 | 2-x,2-y,1-z          | 2-x,2-y,1-z         | 20.53         | 0.33          | 1.50           | -0.06          |
| M1...M16 | 2-x,1-y,1-z          | 2-x,1-y,1-z         | 37.72         | -22.42        | 2.76           | 4.41           |
| M1...M17 | -1/2+x,1.5-y,1/2+z   | -1/2+x,1.5-y,1/2+z  | 8.15          | -1.95         | 0.60           | 0.38           |
| Total    |                      |                     | 218.7         | -81.43        | 16.00          | 16.00          |

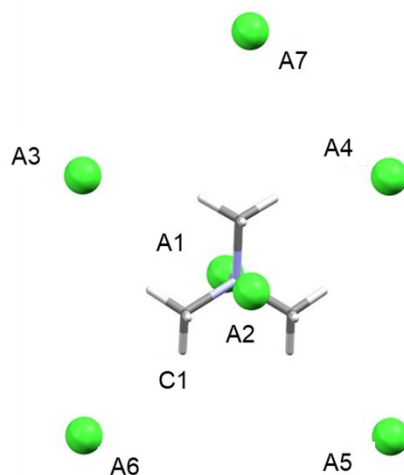

Figure S35. Anions that present contact area with C1 cation of salt **7b**.

Table S35. Symmetry codes, contact area, absolute stabilization energies and N...X distances of each C1...A pair of salt **7b**.

| C1...A  | Anion symmetry code <sup>a</sup> | $C_{C1...A}$ <sup>b</sup> | $G_{C1...A}$ <sup>c</sup> | $ G_{C1...A1} - G_{C1...A} $ <sup>d</sup> | N...X <sup>e</sup> |
|---------|----------------------------------|---------------------------|---------------------------|-------------------------------------------|--------------------|
| C1...A1 | x,y,z                            | 8.66                      | 398562.98                 | 0.00                                      | 3.07               |
| C1...A2 | x,y,1+z                          | 8.50                      | 398542.85                 | 20.13                                     | 4.084              |
| C1...A3 | 1-x,1/2+y,1-z                    | 6.56                      | 398536.65                 | 26.33                                     | 4.34               |
| C1...A4 | 1-x,-1/2+y,1-z                   | 6.56                      | 398536.65                 | 26.33                                     | 4.34               |
| C1...A5 | -x,-1/2+y,1-z                    | 4.55                      | 398523.89                 | 39.09                                     | 5.10               |
| C1...A6 | -x,1/2+y,1-z                     | 4.55                      | 398523.89                 | 39.09                                     | 5.10               |
| C1...A7 | 1+x,y,1+z                        | 0.01                      | 398503.97                 | 59.01                                     | 6.72               |

<sup>a</sup>Cation C1 symmetry code: x,y,z. <sup>b</sup>Contact area between C1 and each considered anion, in  $\text{\AA}^2$ . <sup>c</sup>Absolute energy of each C1...A pair, in a.u.; <sup>d</sup>Difference of absolute energies between the most stable pair and each considered pair, in kcal mol $^{-1}$ . <sup>e</sup>Distance, in  $\text{\AA}$ .

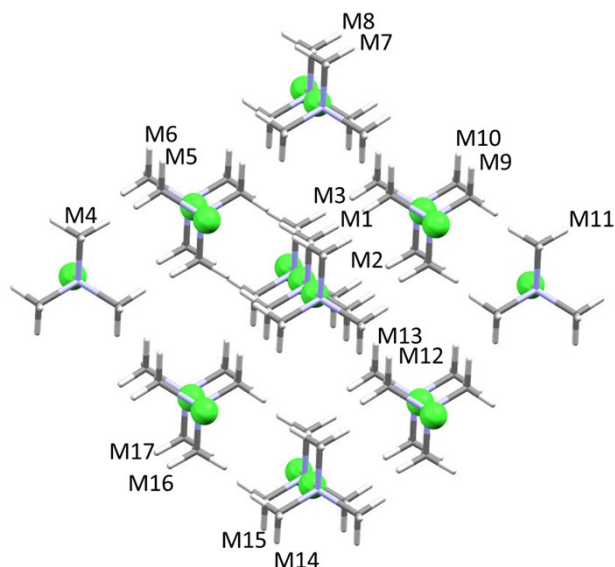

Figure S36. Supramolecular cluster of **7b**.

Table S36. Symmetry codes, contact area ( $C_{M1...MN}$ , in  $\text{\AA}^2$ ) and energetic data ( $G_{M1...MN}$ , in  $\text{kcal mol}^{-1}$ ) for the supramolecular cluster of salt **7b**.

| Dimer    | Cation symmetry code | Anion symmetry code | $C_{M1...MN}$ | $G_{M1...MN}$ | $NC_{M1...MN}$ | $NG_{M1...MN}$ |
|----------|----------------------|---------------------|---------------|---------------|----------------|----------------|
| M1       | x,y,z                | x,y,z               |               |               |                |                |
| M1...M2  | x,y,1+z              | x,y,1+z             | 8.50          | -11.92        | 0.79           | 2.51           |
| M1...M3  | x,y,-1+z             | x,y,-1+z            | 8.50          | -11.92        | 0.79           | 2.51           |
| M1...M4  | x,1+y,z              | x,1+y,z             | 4.85          | 4.90          | 0.45           | -1.03          |
| M1...M5  | 1-x,1/2+y,2-z        | 1-x,1/2+y,2-z       | 16.98         | 2.38          | 1.58           | -0.50          |
| M1...M6  | 1-x,1/2+y,1-z        | 1-x,1/2+y,1-z       | 18.33         | -23.67        | 1.70           | 4.99           |
| M1...M7  | 1+x,y,1+z            | 1+x,y,1+z           | 0.01          | -2.14         | 0.00           | 0.45           |
| M1...M8  | 1+x,y,z              | 1+x,y,z             | 12.32         | 6.79          | 1.15           | -1.43          |
| M1...M9  | 1-x,-1/2+y,2-z       | 1-x,-1/2+y,2-z      | 16.98         | 2.38          | 1.58           | -0.50          |
| M1...M10 | 1-x,-1/2+y,1-z       | 1-x,-1/2+y,1-z      | 18.33         | -23.67        | 1.70           | 4.99           |
| M1...M11 | x,-1+y,z             | x,-1+y,z            | 4.85          | 4.90          | 0.45           | -1.03          |
| M1...M12 | -x,-1/2+y,2-z        | -x,-1/2+y,2-z       | 5.40          | 2.21          | 0.50           | -0.47          |
| M1...M13 | -x,-1/2+y,1-z        | -x,-1/2+y,1-z       | 19.65         | -16.63        | 1.83           | 3.51           |
| M1...M14 | -1+x,y,1+z           | -1+x,y,1+z          | 12.32         | -1.85         | 1.15           | 0.39           |
| M1...M15 | -1+x,y,z             | -1+x,y,z            | 0.01          | 6.79          | 0.00           | -1.43          |
| M1...M16 | -x,1/2+y,2-z         | -x,1/2+y,2-z        | 5.40          | 2.21          | 0.50           | -0.47          |
| M1...M17 | -x,1/2+y,1-z         | -x,1/2+y,1-z        | 19.65         | -16.63        | 1.83           | 3.51           |
| Total    |                      |                     | 172.08        | -75.87        | 16.00          | 16.00          |

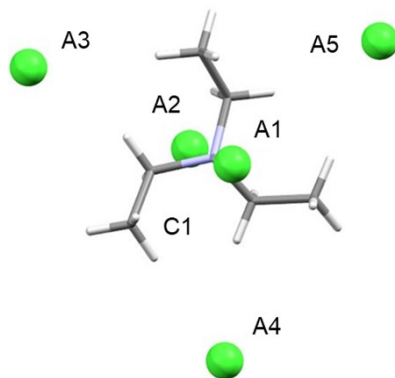

Figure S37. Anions that present contact area with C1 cation of salt **8b**.

Table S37. Symmetry codes, contact area, absolute stabilization energies and N...X distances of each C1...A pair of salt **8b**.

| C1...A  | Anion symmetry code <sup>a</sup> | C <sub>C1...A</sub> <sup>b</sup> | G <sub>C1...A</sub> <sup>c</sup> | G <sub>C1...A1</sub> - G <sub>C1...A</sub>   <sup>d</sup> | N...X <sup>e</sup> |
|---------|----------------------------------|----------------------------------|----------------------------------|-----------------------------------------------------------|--------------------|
| C1...A1 | x,y,z                            | 10.21                            | 472503.35                        | 0.00                                                      | 3.0980             |
| C1...A2 | x,y,1+z                          | 8.06                             | 472486.56                        | 16.79                                                     | 3.9000             |
| C1...A3 | -1+y,x,1/2+z                     | 5.44                             | 472474.83                        | 28.52                                                     | 4.7825             |
| C1...A4 | y,1+x,1/2+z                      | 5.44                             | 472474.83                        | 28.52                                                     | 4.7825             |
| C1...A5 | y,x,1/2+z                        | 5.44                             | 472474.82                        | 28.53                                                     | 4.7839             |

<sup>a</sup>Cation C1 symmetry code: x,y,z. <sup>b</sup>Contact area between C1 and each considered anion, in Å<sup>2</sup>. <sup>c</sup>Absolute energy of each C1...A pair, in a.u.; <sup>d</sup>Difference of absolute energies between the most stable pair and each considered pair, in kcal mol<sup>-1</sup>. <sup>e</sup>Distance, in Å.

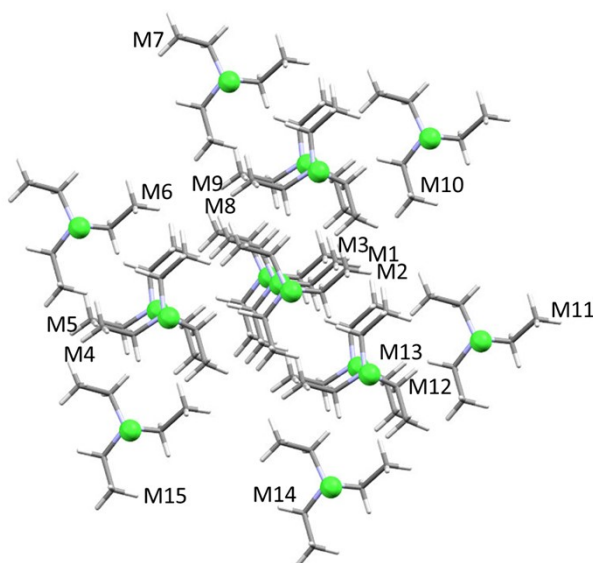

Figure S38. Supramolecular cluster of **8b**.

Table S38. Symmetry codes, contact area (C<sub>M1...MN</sub>, in Å<sup>2</sup>) and energetic data (G<sub>M1...MN</sub>, in kcal mol<sup>-1</sup>) for the supramolecular cluster of salt **8b**.

| Dimer    | Cation symmetry code | Anion symmetry code | C <sub>M1...MN</sub> | G <sub>M1...MN</sub> | NC <sub>M1...MN</sub> | NG <sub>M1...MN</sub> |
|----------|----------------------|---------------------|----------------------|----------------------|-----------------------|-----------------------|
| M1       | x,y,z                | x,y,z               |                      |                      |                       |                       |
| M1...M2  | x,y,-1+z             | x,y,-1+z            | 8.06                 | -10.69               | 0.52                  | 4.82                  |
| M1...M3  | x,y,1+z              | x,y,1+z             | 8.06                 | -10.68               | 0.52                  | 4.81                  |
| M1...M4  | y,1+x,-1/2+z         | y,1+x,-1/2+z        | 26.72                | -3.92                | 1.74                  | 1.77                  |
| M1...M5  | y,1+x,1/2+z          | y,1+x,1/2+z         | 26.72                | -3.91                | 1.74                  | 1.76                  |
| M1...M6  | x,1+y,z              | x,1+y,z             | 6.5                  | 2.29                 | 0.42                  | -1.03                 |
| M1...M7  | -1+x,y,z             | -1+x,y,z            | 6.5                  | 2.30                 | 0.42                  | -1.04                 |
| M1...M8  | -1+y,x,-1/2+z        | -1+y,x,-1/2+z       | 26.72                | -3.93                | 1.74                  | 1.77                  |
| M1...M9  | -1+y,x,1/2+z         | -1+y,x,1/2+z        | 26.72                | -3.91                | 1.74                  | 1.76                  |
| M1...M10 | -1+x,-1+y,z          | -1+x,-1+y,z         | 6.5                  | 2.30                 | 0.42                  | -1.04                 |
| M1...M11 | x,-1+y,z             | x,-1+y,z            | 6.50                 | 2.30                 | 0.42                  | -1.04                 |
| M1...M12 | y,x,-1/2+z           | y,x,-1/2+z          | 26.72                | -3.91                | 1.74                  | 1.76                  |
| M1...M13 | y,x,1/2+z            | y,x,1/2+z           | 26.72                | -3.91                | 1.74                  | 1.76                  |
| M1...M14 | 1+x,y,z              | 1+x,y,z             | 6.5                  | 2.30                 | 0.42                  | -1.04                 |
| M1...M15 | 1+x,1+y,z            | 1+x,1+y,z           | 6.5                  | 2.31                 | 0.42                  | -1.04                 |
| Total    |                      |                     | 215.44               | -31.06               | 14.00                 | 14.00                 |

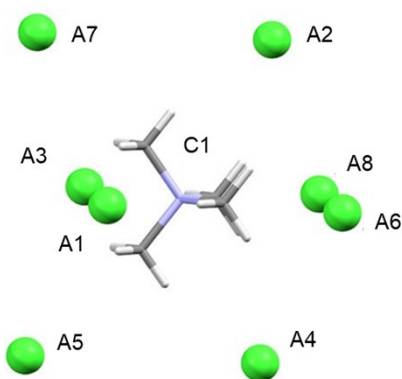

Figure S39. Anions that present contact area with C1 cation of salt **9b**.

Table S39. Symmetry codes, contact area, absolute stabilization energies and N...X distances of each C1...A pair of salt **9b**.

| C1...A  | Anion symmetry code <sup>a</sup> | C <sub>C1...A</sub> <sup>b</sup> | G <sub>C1...A</sub> <sup>c</sup> | G <sub>C1...A1</sub> - G <sub>C1...A</sub>   <sup>d</sup> | N...X <sup>e</sup> |
|---------|----------------------------------|----------------------------------|----------------------------------|-----------------------------------------------------------|--------------------|
| C1...A1 | -1/2+x,1-y,1-z                   | 5.73                             | 423152.70                        | 0.00                                                      | 4.25               |
| C1...A2 | x,y,-1+z                         | 5.73                             | 423152.70                        | 0.00                                                      | 4.25               |
| C1...A3 | 1/2+x,1-y,1-z                    | 5.73                             | 423152.70                        | 0.00                                                      | 4.25               |
| C1...A4 | x,1+y,-1+z                       | 5.73                             | 423152.70                        | 0.00                                                      | 4.25               |
| C1...A5 | x,1+y,z                          | 3.79                             | 423138.26                        | 14.45                                                     | 5.09               |
| C1...A6 | 1/2+x,1-y,-z                     | 3.79                             | 423138.26                        | 14.45                                                     | 5.09               |
| C1...A7 | x,y,z                            | 3.79                             | 423138.26                        | 14.45                                                     | 5.09               |
| C1...A8 | -1/2+x,1-y,-z                    | 3.79                             | 423138.26                        | 14.45                                                     | 5.09               |

<sup>a</sup>Cation C1 symmetry code:  $x,y,z$ . <sup>b</sup>Contact area between C1 and each considered anion, in Å<sup>2</sup>. <sup>c</sup>Absolute energy of each C1...A pair, in a.u.; <sup>d</sup>Difference of absolute energies between the most stable pair and each considered pair, in kcal mol<sup>-1</sup>. <sup>e</sup>Distance, in Å.

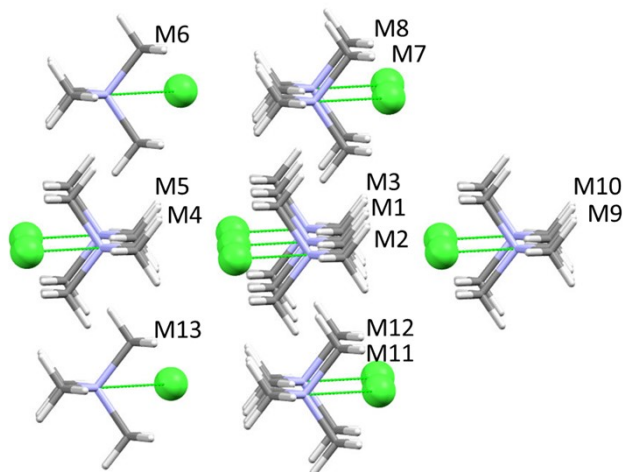

Figure S40. Supramolecular cluster of **9b**.

Table S40. Symmetry codes, contact area ( $C_{M1...MN}$ , in  $\text{\AA}^2$ ) and energetic data ( $G_{M1...MN}$ , in  $\text{kcal mol}^{-1}$ ) for the supramolecular cluster of salt **9b**.

| Dimer    | Cation symmetry code | Anion symmetry code | $C_{M1...MN}$ | $G_{M1...MN}$ | $NC_{M1...MN}$ | $NG_{M1...MN}$ |
|----------|----------------------|---------------------|---------------|---------------|----------------|----------------|
| M1       | x,y,z                | -1/2+x,1-y,1-z      |               |               |                |                |
| M1...M2  | -1+x,y,z             | -1.5+x,1-y,1-z      | 5.73          | -15.45        | 0.39           | 1.13           |
| M1...M3  | 1+x,y,z              | 1/2+x,1-y,1-z       | 5.73          | -15.45        | 0.39           | 1.13           |
| M1...M4  | -1+x,y,1+z           | -1.5+x,1-y,2-z      | 3.79          | -14.01        | 0.26           | 1.02           |
| M1...M5  | x,y,1+z              | -1/2+x,1-y,2-z      | 23            | 7.47          | 1.56           | -0.54          |
| M1...M6  | 1/2-y,x,1+z          | x,y,z               | 7.59          | -24.37        | 0.52           | 1.78           |
| M1...M7  | 1/2-y,x,z            | x,y,-1+z            | 29.88         | -41.13        | 2.03           | 3.00           |
| M1...M8  | 1.5-y,x,z            | 1+x,y,-1+z          | 18.42         | 5.23          | 1.25           | -0.38          |
| M1...M9  | x,y,-1+z             | -1/2+x,1-y,-z       | 23            | 7.47          | 1.56           | -0.54          |
| M1...M10 | 1+x,y,-1+z           | 1/2+x,1-y,-z        | 3.79          | -14.01        | 0.26           | 1.02           |
| M1...M11 | 1/2-y,1+x,z          | x,1+y,-1+z          | 29.88         | -41.13        | 2.03           | 3.00           |
| M1...M12 | 1.5-y,1+x,z          | x,1+y,-1+z          | 18.42         | 5.23          | 1.25           | -0.38          |
| M1...M13 | 1/2-y,1+x,1+z        | x,1+y,z             | 7.59          | -24.37        | 0.52           | 1.78           |
| Total    |                      |                     | 176.82        | -164.52       | 12.00          | 12.00          |

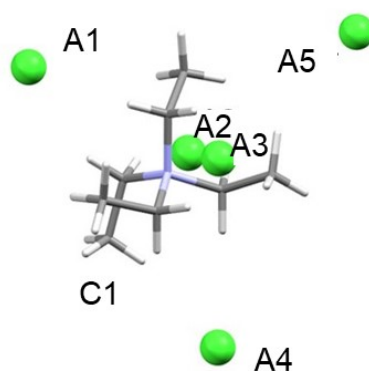

Figure S41. Anions that present contact area with C1 cation of salt **10b**.

Table S41. Symmetry codes, contact area, absolute stabilization energies and  $N...X$  distances of each  $C1...A$  pair of salt **10b**.

| $C1...A$  | Anion symmetry code <sup>a</sup> | $C_{C1...A}$ <sup>b</sup> | $G_{C1...A}$ <sup>c</sup> | $ G_{C1...A1} - G_{C1...A} $ <sup>d</sup> | $N...X$ <sup>e</sup> |
|-----------|----------------------------------|---------------------------|---------------------------|-------------------------------------------|----------------------|
| $C1...A1$ | x,y,z                            | 9.39                      | 521781.67                 | 0.00                                      | 4.278                |
| $C1...A2$ | -x,-1/2+y,1.5-z                  | 8.00                      | 521781.06                 | 0.62                                      | 4.320                |
| $C1...A3$ | 1-x,-1/2+y,1.5-z                 | 8.89                      | 521780.90                 | 0.77                                      | 4.335                |
| $C1...A4$ | x,1/2-y,1/2+z                    | 7.82                      | 521780.10                 | 1.58                                      | 4.410                |
| $C1...A5$ | x,-1+y,z                         | 4.08                      | 521761.79                 | 19.88                                     | 5.770                |

<sup>a</sup>Cation C1 symmetry code: x,y,z. <sup>b</sup>Contact area between C1 and each considered anion, in  $\text{\AA}^2$ . <sup>c</sup>Absolute energy of each  $C1...A$  pair, in a.u.; <sup>d</sup>Difference of absolute energies between the most stable pair and each considered pair, in  $\text{kcal mol}^{-1}$ . <sup>e</sup>Distance, in  $\text{\AA}$ .

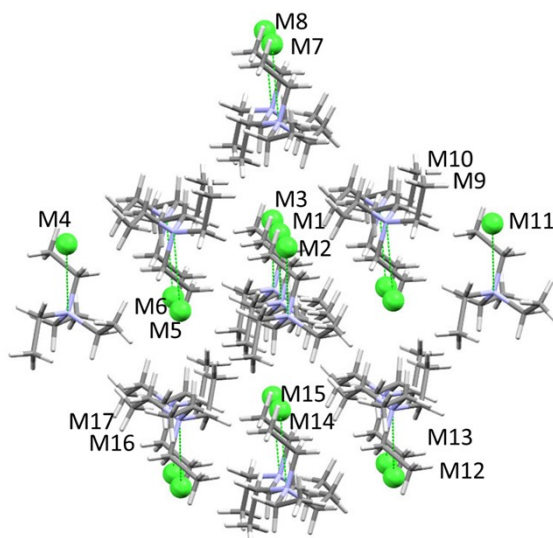

Figure S42. Supramolecular cluster of **10b**.

Table S42. Symmetry codes, contact area ( $C_{M1...MN}$ , in  $\text{\AA}^2$ ) and energetic data ( $G_{M1...MN}$ , in  $\text{kcal mol}^{-1}$ ) for the supramolecular cluster of salt **10b**.

| Dimer    | Cation symmetry code | Anion symmetry code | $C_{M1...MN}$ | $G_{M1...MN}$ | $NC_{M1...MN}$ | $NG_{M1...MN}$ |
|----------|----------------------|---------------------|---------------|---------------|----------------|----------------|
| M1       | x,y,z                | x,y,z               |               |               |                |                |
| M1...M2  | x,1+y,z              | x,1+y,z             | 13.75         | -5.69         | 0.90           | 0.86           |
| M1...M3  | x,-1+y,z             | x,-1+y,z            | 13.75         | -5.69         | 0.90           | 0.86           |
| M1...M4  | -1+x,y,z             | -1+x,y,z            | 0.47          | 4.90          | 0.03           | -0.74          |
| M1...M5  | -x,1/2+y,1.5-z       | -x,1/2+y,1.5-z      | 28.28         | -15.36        | 1.84           | 2.31           |
| M1...M6  | -x,-1/2+y,1.5-z      | -x,-1/2+y,1.5-z     | 28.28         | -15.36        | 1.84           | 2.31           |
| M1...M7  | x,1/2-y,-1/2+z       | x,1/2-y,-1/2+z      | 16.83         | -18.29        | 1.10           | 2.75           |
| M1...M8  | x,-1/2-y,-1/2+z      | x,-1/2-y,-1/2+z     | 0.09          | 0.27          | 0.01           | -0.04          |
| M1...M9  | 1-x,1/2+y,1.5-z      | 1-x,1/2+y,1.5-z     | 30.07         | -14.94        | 1.96           | 2.25           |
| M1...M10 | 1-x,-1/2+y,1.5-z     | 1-x,-1/2+y,1.5-z    | 30.07         | -14.94        | 1.96           | 2.25           |
| M1...M11 | 1+x,y,z              | 1+x,y,z             | 0.47          | 4.90          | 0.03           | -0.74          |
| M1...M12 | 1-x,1-y,2-z          | 1-x,1-y,2-z         | 6.97          | -5.16         | 0.45           | 0.78           |
| M1...M13 | 1-x,-y,2-z           | 1-x,-y,2-z          | 28.53         | 0.98          | 1.86           | -0.15          |
| M1...M14 | x,1/2-y,1/2+z        | x,1/2-y,1/2+z       | 16.83         | -18.29        | 1.10           | 2.75           |
| M1...M15 | x,-1/2-y,1/2+z       | x,-1/2-y,1/2+z      | 0.09          | 0.27          | 0.01           | -0.04          |
| M1...M16 | -x,1-y,2-z           | -x,1-y,2-z          | 6.39          | -4.73         | 0.42           | 0.71           |
| M1...M17 | -x,-y,2-z            | -x,-y,2-z           | 24.48         | 0.86          | 1.60           | -0.13          |
| Total    |                      |                     | 245.35        | -106.25       | 16.00          | 16.00          |

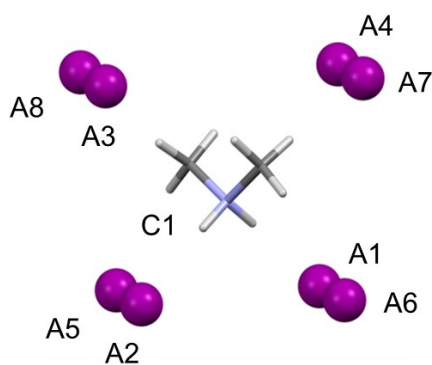

Figure S43. Anions that present contact area with C1 cation of salt **4c**.

Table S43. Symmetry codes, contact area, absolute stabilization energies and N...X distances of each C1...A pair of salt **4c**.

| C1...A  | Anion symmetry code <sup>a</sup> | $C_{C1...A}$ <sup>b</sup> | $G_{C1...A}$ <sup>c</sup> | $ G_{C1...A1} - G_{C1...A} $ <sup>d</sup> | N...X <sup>e</sup> |
|---------|----------------------------------|---------------------------|---------------------------|-------------------------------------------|--------------------|
| C1...A1 | 1-x,y,1-z                        | 7.05                      | -270743.92                | 0.00                                      | 3.526              |
| C1...A2 | x,y,z                            | 7.05                      | -270743.92                | 0.00                                      | 3.526              |
| C1...A3 | 1.5-x,-1/2+y,2-z                 | 6.35                      | -270728.49                | 15.44                                     | 4.469              |
| C1...A4 | -1/2+x,-1/2+y,-1+z               | 6.35                      | -270728.49                | 15.44                                     | 4.469              |
| C1...A5 | x,y,-1+z                         | 5.22                      | -270720.57                | 23.35                                     | 4.829              |
| C1...A6 | 1-x,y,2-z                        | 5.22                      | -270720.57                | 23.35                                     | 4.829              |
| C1...A7 | -1/2+x,-1/2+y,z                  | 4.50                      | -270717.21                | 26.71                                     | 5.351              |
| C1...A8 | 1.5-x,-1/2+y,1-z                 | 4.50                      | -270717.21                | 26.71                                     | 5.351              |

<sup>a</sup>Cation C1 symmetry code: x,y,z. <sup>b</sup>Contact area between C1 and each considered anion, in Å<sup>2</sup>. <sup>c</sup>Absolute energy of each C1...A pair, in a.u.; <sup>d</sup>Difference of absolute energies between the most stable pair and each considered pair, in kcal mol<sup>-1</sup>. <sup>e</sup>Distance, in Å.

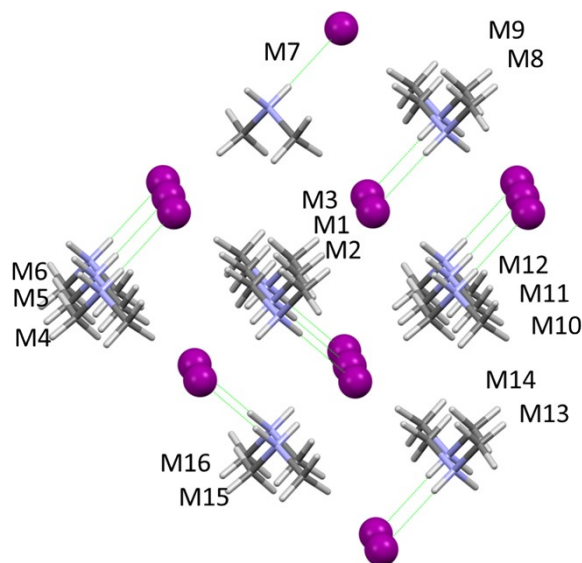

Figure S44. Supramolecular cluster of **4c**.

Table S44. Symmetry codes, contact area ( $C_{M1...MN}$ , in Å<sup>2</sup>) and energetic data ( $G_{M1...MN}$ , in kcal mol<sup>-1</sup>) for the supramolecular cluster of salt **4c**.

| Dimer    | Cation symmetry code | Anion symmetry code | $C_{M1...MN}$ | $G_{M1...M}$<br>$N$ | $NC_{M1...MN}$ | $NG_{M1...MN}$ |
|----------|----------------------|---------------------|---------------|---------------------|----------------|----------------|
| M1       | x,y,z                | 1-x,y,1-z           |               |                     |                |                |
| M1...M2  | x,y,1+z              | 1-x,y,2-z           | 19.51         | 4.19                | 1.75           | -0.61          |
| M1...M3  | x,y,-1+z             | 1-x,y,-z            | 19.51         | 4.19                | 1.75           | -0.61          |
| M1...M4  | 1.5-x,0.5-y,2-z      | 1.5-x,-0.5+y,2-z    | 6.35          | -12.58              | 0.57           | 1.83           |
| M1...M5  | 1.5-x,0.5-y,1-z      | 1.5-x,-0.5+y,1-z    | 19.83         | -2.97               | 1.77           | 0.43           |
| M1...M6  | 1.5-x,0.5-y,-z       | 1.5-x,-0.5+y,-z     | 0.05          | 0.99                | 0.00           | -0.14          |
| M1...M7  | 1-x,-y,1-z           | 1-x,-1+y,1-z        | 20.12         | 7.04                | 1.80           | -1.02          |
| M1...M8  | -0.5+x,-0.5+y,z      | -0.5+x,-0.5+y,z     | 4.5           | -8.88               | 0.40           | 1.29           |
| M1...M9  | -0.5+x,-0.5+y,-1+z   | -0.5+x,-0.5+y,-1+z  | 6.35          | -5.62               | 0.57           | 0.82           |
| M1...M10 | 0.5-x,0.5-y,2-z      | 0.5-x,-0.5+y,2-z    | 0.05          | 0.99                | 0.00           | -0.14          |
| M1...M11 | 0.5-x,0.5-y,1-z      | 0.5-x,-0.5+y,1-z    | 19.83         | -2.97               | 1.77           | 0.43           |
| M1...M12 | 0.5-x,0.5-y,-z       | 0.5-x,-0.5+y,-z     | 6.35          | -12.58              | 0.57           | 1.83           |
| M1...M13 | -0.5+x,0.5+y,z       | -0.5+x,0.5+y,z      | 4.5           | -8.88               | 0.40           | 1.29           |
| M1...M14 | -0.5+x,0.5+y,-1+z    | -0.5+x,0.5+y,-1+z   | 6.35          | -5.62               | 0.57           | 0.82           |
| M1...M15 | 1-x,1-y,1-z          | x,y,z               | 23.36         | -44.49              | 2.09           | 6.47           |
| M1...M16 | 1-x,1-y,-z           | x,y,-1+z            | 10.95         | -15.91              | 0.98           | 2.32           |
| Total    |                      |                     | 167.61        | -103.09             | 15.00          | 15.00          |



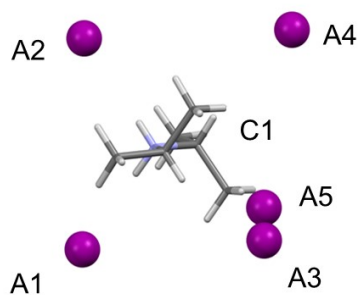

Figure S45. Anions that present contact area with C1 cation of salt **5c**.

Table S45. Symmetry codes, contact area, absolute stabilization energies and N $\cdots$ X distances of each C1 $\cdots$ A pair of salt **5c**.

| C1 $\cdots$ A  | Anion symmetry code <sup>a</sup> | C <sub>C1<math>\cdots</math>A</sub> <sup>b</sup> | G <sub>C1<math>\cdots</math>A</sub> <sup>c</sup> | G <sub>C1<math>\cdots</math>A1</sub> - G <sub>C1<math>\cdots</math>A</sub>   <sup>d</sup> | N $\cdots$ X <sup>e</sup> |
|----------------|----------------------------------|--------------------------------------------------|--------------------------------------------------|-------------------------------------------------------------------------------------------|---------------------------|
| C1 $\cdots$ A1 | 1+x,y,z                          | 11.4                                             | -369220.35                                       | 0                                                                                         | 3.586                     |
| C1 $\cdots$ A2 | 1/2+x,1.5-y,-z                   | 11.45                                            | 369217.25                                        | 3.10                                                                                      | 3.578                     |
| C1 $\cdots$ A3 | 1-x,-1/2+y,1/2-z                 | 8.86                                             | 369199.44                                        | 20.91                                                                                     | 5.058                     |
| C1 $\cdots$ A4 | x,y,z                            | 8.26                                             | 369198.48                                        | 21.86                                                                                     | 4.991                     |
| C1 $\cdots$ A5 | 1-x,1/2+y,1/2-z                  | 6.50                                             | 369186.69                                        | 33.66                                                                                     | 6.215                     |

<sup>a</sup>Cation C1 symmetry code:  $x,y,z$ . <sup>b</sup>Contact area between C1 and each considered anion, in  $\text{\AA}^2$ . <sup>c</sup>Absolute energy of each C1 $\cdots$ A pair, in a.u.; <sup>d</sup>Difference of absolute energies between the most stable pair and each considered pair, in  $\text{kcal mol}^{-1}$ . <sup>e</sup>Distance, in  $\text{\AA}$ .

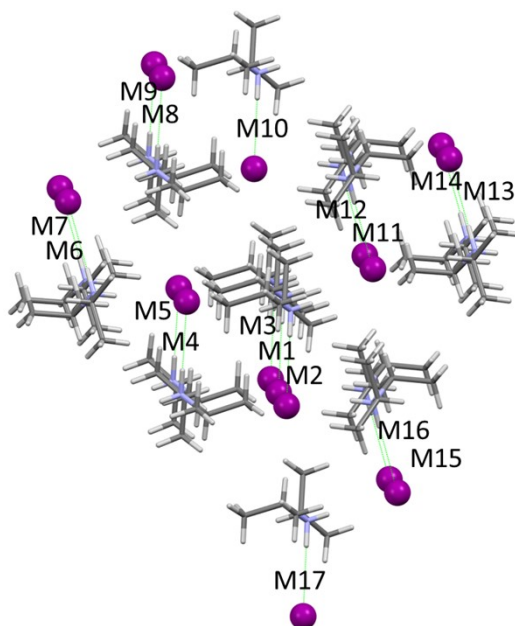

Figure S46. Supramolecular cluster of **5c**.

Table S46. Symmetry codes, contact area ( $C_{M1...MN}$ , in  $\text{\AA}^2$ ) and energetic data ( $G_{M1...MN}$ , in  $\text{kcal mol}^{-1}$ ) for the supramolecular cluster of salt **5c**.

| Dimer    | Cation symmetry code | Anion symmetry code | $C_{M1...MN}$ | $G_{M1...MN}$ | $NC_{M1...MN}$ | $NG_{M1...MN}$ |
|----------|----------------------|---------------------|---------------|---------------|----------------|----------------|
| M1       | x,y,z                | 1+x,y,z             |               |               |                |                |
| M1...M2  | x,1+y,z              | 1+x,1+y,z           | 12.68         | 2.71          | 0.84           | -0.56          |
| M1...M3  | x,-1+y,z             | 1+x,-1+y,z          | 12.68         | 2.71          | 0.84           | -0.56          |
| M1...M4  | 2-x,0.5+y,0.5-z      | 1-x,0.5+y,0.5-z     | 34.33         | -18.87        | 2.28           | 3.93           |
| M1...M5  | 2-x,-0.5+y,0.5-z     | 1-x,-0.5+y,0.5-z    | 34.33         | -18.87        | 2.28           | 3.93           |
| M1...M6  | 1.5-x,2-y,0.5+z      | 0.5-x,2-y,0.5+z     | 0.52          | -1.97         | 0.03           | 0.41           |
| M1...M7  | 1.5-x,1-y,0.5+z      | 0.5-x,1-y,0.5+z     | 8.61          | -1.58         | 0.57           | 0.33           |
| M1...M8  | 1-x,0.5+y,0.5-z      | -x,0.5+y,0.5-z      | 14.14         | 1.11          | 0.94           | -0.23          |
| M1...M9  | 1-x,-0.5+y,0.5-z     | -x,-0.5+y,0.5-z     | 14.14         | 1.11          | 0.94           | -0.23          |
| M1...M10 | -1+x,y,z             | x,y,z               | 8.26          | -9.92         | 0.55           | 2.07           |
| M1...M11 | -0.5+x,1.5-y,-z      | 0.5+x,1.5-y,-z      | 31.52         | -10.41        | 2.09           | 2.17           |
| M1...M12 | -0.5+x,0.5-y,-z      | 0.5+x,0.5-y,-z      | 10.39         | 0.51          | 0.69           | -0.11          |
| M1...M13 | 1.5-x,2-y,-0.5+z     | 0.5-x,2-y,-0.5+z    | 0.52          | -1.97         | 0.03           | 0.41           |
| M1...M14 | 1.5-x,1-y,-0.5+z     | 0.5-x,1-y,-0.5+z    | 8.61          | -1.58         | 0.57           | 0.33           |
| M1...M15 | 0.5+x,1.5-y,-z       | 1.5+x,1.5-y,-z      | 31.52         | -10.41        | 2.09           | 2.17           |
| M1...M16 | 0.5+x,0.5-y,-z       | 1.5+x,0.5-y,-z      | 10.39         | 0.51          | 0.69           | -0.11          |
| M1...M17 | 1+x,y,z              | 2+x,y,z             | 8.26          | -9.92         | 0.55           | 2.07           |
| Total    |                      |                     | 240.90        | -76.86        | 16.00          | 16.00          |

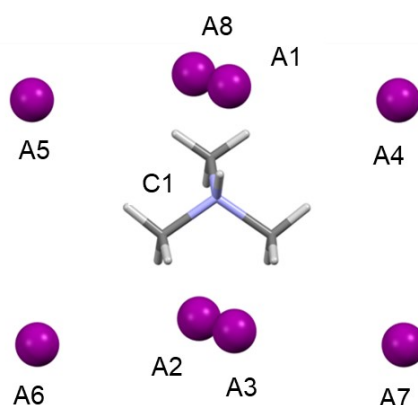

Figure S47. Anions that present contact area with C1 cation of salt **7c**.

Table S47. Symmetry codes, contact area, absolute stabilization energies and N...X distances of each C1...A pair of salt **7c**.

| C1...A  | Anion symmetry code <sup>a</sup> | $C_{C1...A}$ <sup>b</sup> | $G_{C1...A}$ <sup>c</sup> | $ G_{C1...A1} - G_{C1...A} $ <sup>d</sup> | N...X <sup>e</sup> |
|---------|----------------------------------|---------------------------|---------------------------|-------------------------------------------|--------------------|
| C1...A1 | 1+x,y,1+z                        | 7.15                      | 295318.51                 | 0.00                                      | 3.500              |
| C1...A2 | x,y,z                            | 7.43                      | 295308.49                 | 10.02                                     | 4.405              |
| C1...A3 | x,y,1+z                          | 6.43                      | 295302.14                 | 16.37                                     | 4.663              |
| C1...A4 | 1-x,-1/2+y,1-z                   | 5.51                      | 295301.89                 | 16.62                                     | 4.675              |
| C1...A5 | 1-x,1/2+y,1-z                    | 5.51                      | 295301.89                 | 16.62                                     | 4.675              |
| C1...A6 | -x,1/2+y,1-z                     | 4.82                      | 295293.21                 | 25.30                                     | 5.329              |
| C1...A7 | -x,-1/2+y,1-z                    | 4.82                      | 295293.21                 | 25.30                                     | 5.329              |
| C1...A8 | 1+x,y,z                          | 4.24                      | 295293.08                 | 25.43                                     | 5.353              |

<sup>a</sup>Cation C1 symmetry code: x,y,z. <sup>b</sup>Contact area between C1 and each considered anion, in  $\text{\AA}^2$ . <sup>c</sup>Absolute energy of each C1...A pair, in a.u.; <sup>d</sup>Difference of absolute energies between the most stable pair and each considered pair, in  $\text{kcal mol}^{-1}$ . <sup>e</sup>Distance, in  $\text{\AA}$ .

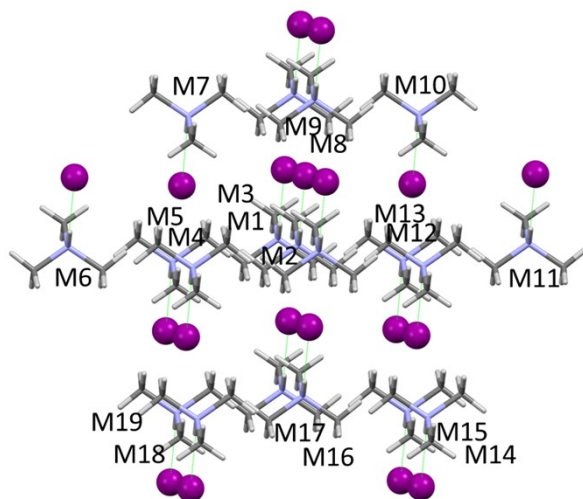

Figure S48. Supramolecular cluster of **7c**.

Table S48. Symmetry codes, contact area ( $C_{M1...MN}$ , in  $\text{\AA}^2$ ) and energetic data ( $G_{M1...MN}$ , in  $\text{kcal mol}^{-1}$ ) for the supramolecular cluster of salt **7c**.

| Dimer    | Cation symmetry code | Anion symmetry code | $C_{M1...MN}$ | $G_{M1...MN}$ | $NC_{M1...MN}$ | $NG_{M1...MN}$ |
|----------|----------------------|---------------------|---------------|---------------|----------------|----------------|
| M1       | x,y,z                | 1+x,y,1+z           | 3.6           |               |                |                |
| M1...M2  | x,y,1+z              | 1+x,y,2+z           | 4.24          | -4.06         | 0.42           | 0.72           |
| M1...M3  | x,y,-1+z             | 1+x,y,z             | 4.24          | -4.06         | 0.42           | 0.72           |
| M1...M4  | 1-x,0.5+y,2-z        | -x,0.5+y,1-z        | 24.84         | -19.78        | 2.43           | 3.53           |
| M1...M5  | 1-x,0.5+y,1-z        | -x,0.5+y,-z         | 20.21         | 2.70          | 1.98           | -0.48          |
| M1...M6  | x,1+y,z              | 1+x,1+y,1+z         | 0.35          | 4.68          | 0.03           | -0.83          |
| M1...M7  | 2-x,0.5+y,2-z        | 1-x,0.5+y,1-z       | 11.01         | -22.24        | 1.08           | 3.96           |
| M1...M8  | 1+x,y,1+z            | 2+x,y,2+z           | 7.43          | -14.53        | 0.73           | 2.59           |
| M1...M9  | 1+x,y,z              | 2+x,y,1+z           | 22.94         | 0.86          | 2.25           | -0.15          |
| M1...M10 | 2-x,-0.5+y,2-z       | 1-x,-0.5+y,1-z      | 11.01         | -22.28        | 1.08           | 3.97           |
| M1...M11 | x,-1+y,z             | 1+x,-1+y,1+z        | 0.35          | 4.68          | 0.03           | -0.83          |
| M1...M12 | 1-x,-0.5+y,2-z       | -x,-0.5+y,1-z       | 24.84         | -19.79        | 2.43           | 3.53           |
| M1...M13 | 1-x,-0.5+y,1-z       | -x,-0.5+y,-z        | 20.21         | 2.71          | 1.98           | -0.48          |
| M1...M14 | -x,-0.5+y,2-z        | -1-x,-0.5+y,1-z     | 0.28          | -1.38         | 0.03           | 0.25           |
| M1...M15 | -x,-0.5+y,1-z        | -1-x,-0.5+y,-z      | 0.61          | 3.27          | 0.06           | -0.58          |
| M1...M16 | -1+x,y,z             | x,y,1+z             | 22.94         | 0.86          | 2.25           | -0.15          |
| M1...M17 | -1+x,y,-1+z          | x,y,z               | 7.43          | -14.53        | 0.73           | 2.59           |
| M1...M18 | -x,0.5+y,2-z         | -1-x,0.5+y,1-z      | 0.28          | -1.38         | 0.03           | 0.25           |
| M1...M19 | -x,0.5+y,1-z         | -1-x,0.5+y,-z       | 0.61          | 3.27          | 0.06           | -0.58          |
| Total    |                      |                     | 183.82        | -101.01       | 18.00          | 18.00          |

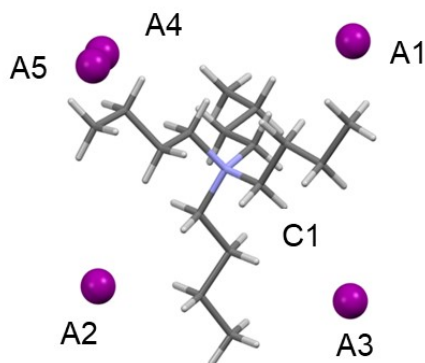

Figure S49. Anions that present contact area with C1 cation of salt **12c**.

Table S49. Symmetry codes, contact area, absolute stabilization energies and N...X distances of each C1...A pair of salt **12c**.

| C1...A  | Anion symmetry code <sup>a</sup> | C <sub>C1...A</sub> <sup>b</sup> | G <sub>C1...A</sub> <sup>c</sup> | G <sub>C1...A1</sub> - G <sub>C1...A</sub>   <sup>d</sup> | N...X <sup>e</sup> |
|---------|----------------------------------|----------------------------------|----------------------------------|-----------------------------------------------------------|--------------------|
| C1...A1 | -1/2+x,-1/2+y,z                  | 11.29                            | -615834.14                       | 0.00                                                      | 5.048              |
| C1...A2 | x,y,z                            | 10.95                            | -615833.85                       | 0.29                                                      | 5.067              |
| C1...A3 | 1.5-x,1/2-y,1-z                  | 10.98                            | -615833.77                       | 0.37                                                      | 5.079              |
| C1...A4 | 1-x,1-y,1-z                      | 11.07                            | -615833.57                       | 0.57                                                      | 5.090              |
| C1...A5 | 1-x,y,1/2-z                      | 1.68                             | -615802.34                       | 31.79                                                     | 9.124              |

<sup>a</sup>Cation C1 symmetry code: x,y,z. <sup>b</sup>Contact area between C1 and each considered anion, in Å<sup>2</sup>. <sup>c</sup>Absolute energy of each C1...A pair, in a.u.; <sup>d</sup>Difference of absolute energies between the most stable pair and each considered pair, in kcal mol<sup>-1</sup>. <sup>e</sup>Distance, in Å.

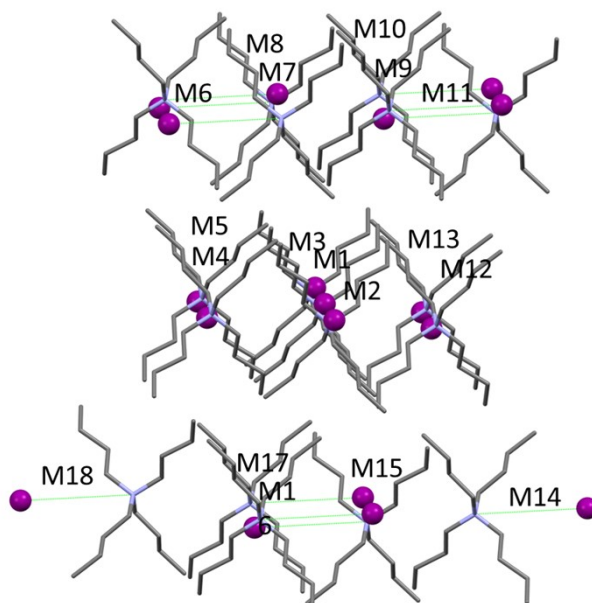

Figure S50. Supramolecular cluster of **12c**. Hydrogens were omitted for clarity.

Table S50. Symmetry codes, contact area (C<sub>M1...MN</sub>, in Å<sup>2</sup>) and energetic data (G<sub>M1...MN</sub>, in kcal mol<sup>-1</sup>) for the supramolecular cluster of salt **12c**.

| Dimer    | Cation symmetry code | Anion symmetry code | C <sub>M1...MN</sub> | G <sub>M1...M</sub> <sub>N</sub> | NC <sub>M1...MN</sub> | NG <sub>M1...MN</sub> |
|----------|----------------------|---------------------|----------------------|----------------------------------|-----------------------|-----------------------|
| M1       | x,y,z                | -0.5+x,-0.5+y,z     |                      |                                  |                       |                       |
| M1...M2  | -0.5+x,-0.5+y,z      | -1+x,-1+y,z         | 11.00                | -15.98                           | 0.42                  | 1.93                  |
| M1...M3  | 0.5+x,0.5+y,z        | x,y,z               | 11.00                | -15.98                           | 0.42                  | 1.93                  |
| M1...M4  | 1-x,-y,1-z           | 1.5-x,0.5-y,1-z     | 73.96                | -39.77                           | 2.86                  | 4.81                  |
| M1...M5  | 1.5-x,0.5-y,1-z      | 2-x,1-y,1-z         | 51.41                | -3.05                            | 1.99                  | 0.37                  |
| M1...M6  | x,-y,-0.5+z          | -0.5+x,0.5-y,-0.5+z | 7.65                 | -0.94                            | 0.30                  | 0.11                  |
| M1...M7  | 0.5-x,-0.5+y,0.5-z   | 1-x,-1+y,0.5-z      | 13.03                | -4.46                            | 0.50                  | 0.54                  |
| M1...M8  | 1-x,y,0.5-z          | 1.5-x,-0.5+y,0.5-z  | 22.77                | -1.66                            | 0.88                  | 0.20                  |
| M1...M9  | -0.5+x,0.5-y,-0.5+z  | -1+x,1-y,-0.5+z     | 25.30                | -4.06                            | 0.98                  | 0.49                  |
| M1...M10 | x,1-y,-0.5+z         | -0.5+x,1.5-y,-0.5+z | 8.70                 | 0.59                             | 0.34                  | -0.07                 |
| M1...M11 | 0.5-x,0.5+y,0.5-z    | 1-x,y,0.5-z         | 13.03                | -4.46                            | 0.50                  | 0.54                  |
| M1...M12 | 0.5-x,0.5-y,1-z      | 1-x,1-y,1-z         | 73.79                | -39.70                           | 2.85                  | 4.80                  |
| M1...M13 | 1-x,1-y,1-z          | 1.5-x,1.5-y,1-z     | 52.66                | -2.47                            | 2.03                  | 0.30                  |
| M1...M14 | x,1-y,0.5+z          | -0.5+x,1.5-y,0.5+z  | 8.70                 | 0.59                             | 0.34                  | -0.07                 |
| M1...M15 | 1-x,y,1.5-z          | 1.5-x,-0.5+y,1.5-z  | 30.25                | -4.89                            | 1.17                  | 0.59                  |
| M1...M16 | x,-y,0.5+z           | -0.5+x,0.5-y,0.5+z  | 7.65                 | -0.94                            | 0.30                  | 0.11                  |
| M1...M17 | 0.5+x,0.5-y,0.5+z    | x,1-y,0.5+z         | 25.3                 | -4.06                            | 0.98                  | 0.49                  |
| M1...M18 | 2-x,y,1.5-z          | 2.5-x,-0.5+y,1.5-z  | 3.96                 | 0.72                             | 0.15                  | -0.09                 |
| Total    |                      |                     | 440.16               | -140.52                          | 17.00                 | 17.00                 |

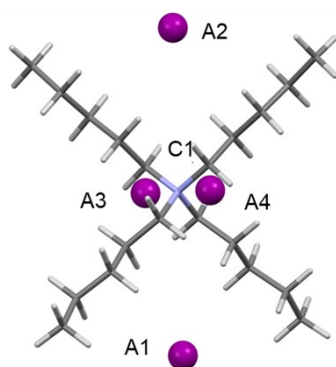

Figure S51. Anions that present contact area with C1 cation of salt **13c**.

Table S51. Symmetry codes, contact area, absolute stabilization energies and N...X distances of each C1...A pair of salt **13c**.

| C1...A  | Anion symmetry code <sup>a</sup> | $C_{C1...A}$ <sup>b</sup> | $G_{C1...A}$ <sup>c</sup> | $ G_{C1...A1} - G_{C1...A} $ <sup>d</sup> | N...X <sup>e</sup> |
|---------|----------------------------------|---------------------------|---------------------------|-------------------------------------------|--------------------|
| C1...A1 | -1/2+x,y,-z                      | 7.77                      | -714707.66824324          | 2.11                                      | 4.750              |
| C1...A2 | -1/2+x,y,1-z                     | 7.77                      | -714707.66825130          | 2.11                                      | 4.750              |
| C1...A3 | -1+x,y,z                         | 15.03                     | -714709.78323328          | 0.0000109                                 | 5.405              |
| C1...A4 | x,y,z                            | 15.03                     | -714709.78324419          | 0.0000000                                 | 5.405              |
| C1...A5 | -1/2+x,y,-z                      | 7.77                      | -714707.66824324          | 2.11                                      | 4.750              |

<sup>a</sup>Cation C1 symmetry code:  $x,y,z$ . <sup>b</sup>Contact area between C1 and each considered anion, in Å<sup>2</sup>. <sup>c</sup>Absolute energy of each C1...A pair, in a.u.; <sup>d</sup>Difference of absolute energies between the most stable pair and each considered pair, in kcal mol<sup>-1</sup>. <sup>e</sup>Distance, in Å.

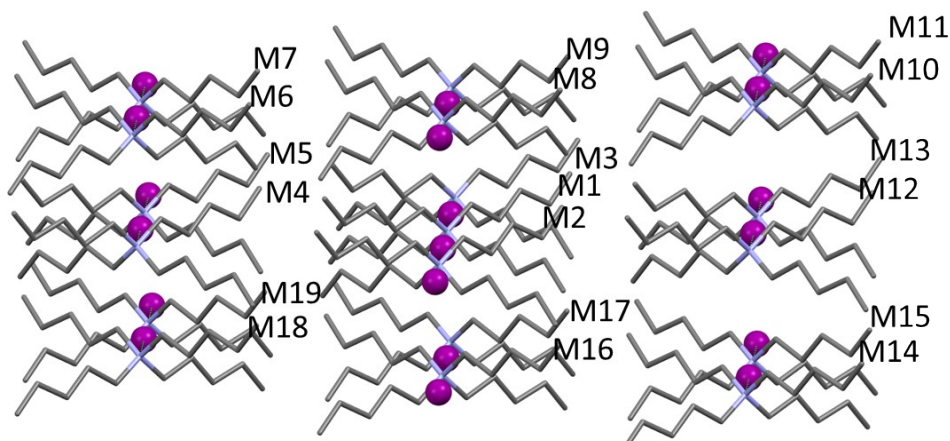

Figure S52. Supramolecular cluster of **13c**. Hydrogens were omitted for clarity.

Table S52. Symmetry codes, contact area ( $C_{M1...MN}$ , in  $\text{\AA}^2$ ) and energetic data ( $G_{M1...MN}$ , in  $\text{kcal mol}^{-1}$ ) for the supramolecular cluster of salt **13c**.

| Dimer    | Cation symmetry code | Anion symmetry code | $C_{M1...MN}$ | $G_{M1...MN}$ | $NC_{M1...MN}$ | $NG_{M1...MN}$ |
|----------|----------------------|---------------------|---------------|---------------|----------------|----------------|
| M1       | x,y,z                | x,y,z               |               |               |                |                |
| M1...M2  | 1+x,y,z              | 1+x,y,z             | 50.70         | -21.06        | 1.66           | 2.62           |
| M1...M3  | -1+x,y,z             | -1+x,y,z            | 50.70         | -21.06        | 1.66           | 2.62           |
| M1...M4  | 1/2-x,1-y,z          | 1/2-x,1-y,z         | 21.82         | -6.45         | 0.72           | 0.80           |
| M1...M5  | -1/2-x,1-y,z         | -1/2-x,1-y,z        | 21.82         | -6.45         | 0.72           | 0.80           |
| M1...M6  | 1-x,1-y,-z           | 1-x,1-y,-z          | 12.67         | -2.01         | 0.42           | 0.25           |
| M1...M7  | -x,1-y,-z            | -x,1-y,-z           | 2.64          | -2.83         | 0.09           | 0.35           |
| M1...M8  | 1/2+x,y,-z           | 1/2+x,y,-z          | 74.62         | -14.41        | 2.45           | 1.79           |
| M1...M9  | -1/2+x,y,-z          | -1/2+x,y,-z         | 74.62         | -14.41        | 2.45           | 1.79           |
| M1...M10 | -x,-y,-z             | -x,-y,-z            | 2.64          | -2.83         | 0.09           | 0.35           |
| M1...M11 | -1-x,-y,-z           | -1-x,-y,-z          | 12.67         | -2.01         | 0.42           | 0.25           |
| M1...M12 | 1/2-x,-y,z           | 1/2-x,-y,z          | 21.82         | -6.45         | 0.72           | 0.80           |
| M1...M13 | -1/2-x,-y,z          | -1/2-x,-y,z         | 21.82         | -6.45         | 0.72           | 0.80           |
| M1...M14 | 1-x,-y,1-z           | 1-x,-y,1-z          | 12.67         | -2.01         | 0.42           | 0.25           |
| M1...M15 | -x,-y,1-z            | -x,-y,1-z           | 2.64          | -2.83         | 0.09           | 0.35           |
| M1...M16 | 1/2+x,y,1-z          | 1/2+x,y,1-z         | 74.62         | -14.41        | 2.45           | 1.79           |
| M1...M17 | -1/2+x,y,1-z         | -1/2+x,y,1-z        | 74.62         | -14.41        | 2.45           | 1.79           |
| M1...M18 | -x,1-y,1-z           | -x,1-y,1-z          | 2.64          | -2.83         | 0.09           | 0.35           |
| M1...M19 | -1-x,1-y,1-z         | -1-x,1-y,1-z        | 12.67         | -2.01         | 0.42           | 0.25           |
| Total    |                      |                     | 548.40        | -144.89       | 18.00          | 18.00          |

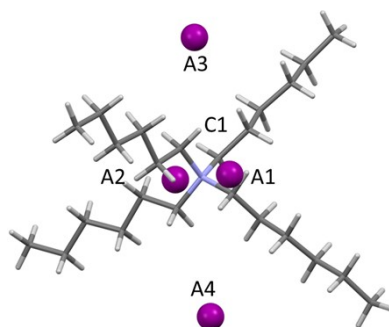

Figure S53. Anions that present contact area with C1 cation of salt **14c**.

Table S53. Symmetry codes, contact area, absolute stabilization energies and N...X distances of each C1...A pair of salt **14c**.

| C1...A  | Anion symmetry code <sup>a</sup> | $C_{C1...A}$ <sup>b</sup> | $G_{C1...A}$ <sup>c</sup> | $ G_{C1...A1} - G_{C1...A} $ <sup>d</sup> | N...X <sup>e</sup> |
|---------|----------------------------------|---------------------------|---------------------------|-------------------------------------------|--------------------|
| C1...A1 | x,y,z                            | 12.08                     | -813042.44972188          | 0.00000000                                | 5.012              |
| C1...A2 | x,1+y,z                          | 12.08                     | -813042.44972186          | 0.00000002                                | 5.012              |
| C1...A3 | 1/2-x,1/2+y,z                    | 11.62                     | -813042.13406789          | 0.31565400                                | 5.038              |
| C1...A4 | 1.5-x,1/2+y,z                    | 11.62                     | -813042.13406789          | 0.31565400                                | 5.038              |

<sup>a</sup>Cation C1 symmetry code: x,y,z. <sup>b</sup>Contact area between C1 and each considered anion, in  $\text{\AA}^2$ . <sup>c</sup>Absolute energy of each C1...A pair, in a.u.; <sup>d</sup>Difference of absolute energies between the most stable pair and each considered pair, in  $\text{kcal mol}^{-1}$ . <sup>e</sup>Distance, in  $\text{\AA}$ .

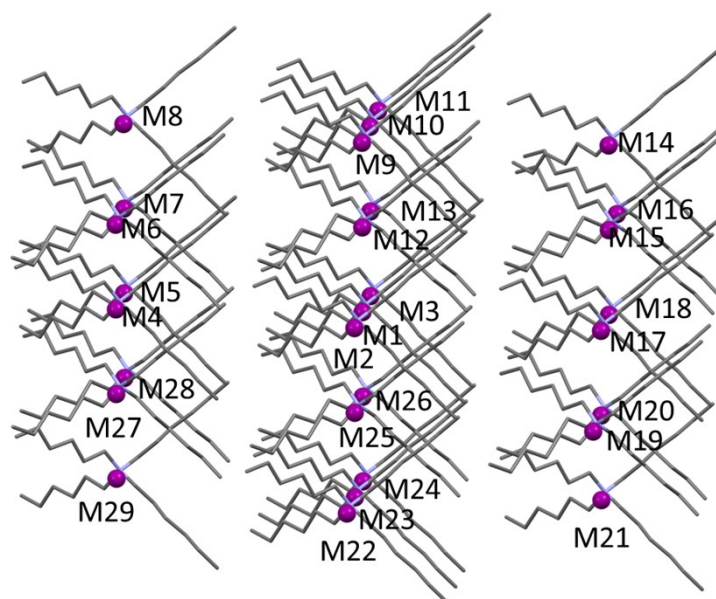

Figure S54. Supramolecular cluster of **14c**. Hydrogens were omitted for clarity.

Table S54. Symmetry codes, contact area ( $C_{M1\dots MN}$ , in  $\text{\AA}^2$ ) and energetic data ( $G_{M1\dots MN}$ , in kcal mol $^{-1}$ ) for the supramolecular cluster of salt **14c**.

| Dimer    | Cation symmetry code | Anion symmetry code | $C_{M1\dots MN}$ | $G_{M1\dots MN}$ | $NC_{M1\dots MN}$ | $NG_{M1\dots MN}$ |
|----------|----------------------|---------------------|------------------|------------------|-------------------|-------------------|
| M1       | x,y,z                | x,y,z               |                  |                  |                   |                   |
| M1...M2  | x,-1+y,z             | x,-1+y,z            | 29.55            | -18.77           | 1.30              | 3.96              |
| M1...M3  | x,1+y,z              | x,1+y,z             | 29.55            | -18.77           | 1.30              | 3.96              |
| M1...M4  | x,-1/2+y,-1/2+z      | x,-1/2+y,-1/2+z     | 15.17            | -0.97            | 0.67              | 0.21              |
| M1...M5  | x,1/2+y,-1/2+z       | x,1/2+y,-1/2+z      | 15.17            | -0.97            | 0.67              | 0.21              |
| M1...M6  | 1/2-x,-1+y,-1/2+z    | 1/2-x,-1+y,-1/2+z   | 8.63             | -1.33            | 0.38              | 0.28              |
| M1...M7  | 1/2-x,y,-1/2+z       | 1/2-x,y,-1/2+z      | 10.17            | -1.92            | 0.45              | 0.41              |
| M1...M8  | -1+x,-1/2+y,-1/2+z   | -1+x,-1/2+y,-1/2+z  | 5.28             | 0.02             | 0.23              | 0.00              |
| M1...M9  | -1+x,-1+y,z          | -1+x,-1+y,z         | 0.16             | -1.52            | 0.01              | 0.32              |
| M1...M10 | -1+x,y,z             | -1+x,y,z            | 17.48            | 1.41             | 0.77              | -0.30             |
| M1...M11 | -1+x,1+y,z           | -1+x,1+y,z          | 0.32             | -1.34            | 0.01              | 0.28              |
| M1...M12 | 1/2-x,-1/2+y,z       | 1/2-x,-1/2+y,z      | 96.44            | -18.82           | 4.23              | 3.98              |
| M1...M13 | 1/2-x,1/2+y,z        | 1/2-x,1/2+y,z       | 96.44            | -18.82           | 4.23              | 3.98              |
| M1...M14 | -1+x,-1/2+y,1/2+z    | -1+x,-1/2+y,1/2+z   | 5.28             | 0.02             | 0.23              | 0.00              |
| M1...M15 | 1/2-x,y,1/2+z        | 1/2-x,y,1/2+z       | 10.17            | -1.92            | 0.45              | 0.41              |
| M1...M16 | 1/2-x,1+y,1/2+z      | 1/2-x,1+y,1/2+z     | 8.63             | -1.33            | 0.38              | 0.28              |
| M1...M17 | x,-1/2+y,1/2+z       | x,-1/2+y,1/2+z      | 15.17            | -0.97            | 0.67              | 0.21              |
| M1...M18 | x,1/2+y,1/2+z        | x,1/2+y,1/2+z       | 15.17            | -0.97            | 0.67              | 0.21              |
| M1...M19 | 1.5-x,-1+y,1/2+z     | 1.5-x,-1+y,1/2+z    | 8.63             | -1.33            | 0.38              | 0.28              |
| M1...M20 | 1.5-x,y,1/2+z        | 1.5-x,y,1/2+z       | 10.17            | -1.92            | 0.45              | 0.41              |
| M1...M21 | 1+x,1/2+y,1/2+z      | 1+x,1/2+y,1/2+z     | 5.28             | 0.02             | 0.23              | 0.00              |
| M1...M22 | 1+x,-1+y,z           | 1+x,-1+y,z          | 0.32             | -1.34            | 0.01              | 0.28              |
| M1...M23 | 1+x,y,z              | 1+x,y,z             | 17.48            | 1.41             | 0.77              | -0.30             |
| M1...M24 | 1+x,1+y,z            | 1+x,1+y,z           | 0.16             | -1.52            | 0.01              | 0.32              |
| M1...M25 | 1.5-x,-1/2+y,z       | 1.5-x,-1/2+y,z      | 96.44            | -18.82           | 4.23              | 3.98              |
| M1...M26 | 1.5-x,1/2+y,z        | 1.5-x,1/2+y,z       | 96.44            | -18.82           | 4.23              | 3.98              |
| M1...M27 | 1.5-x,y,-1/2+z       | 1.5-x,y,-1/2+z      | 10.17            | -1.92            | 0.45              | 0.41              |
| M1...M28 | 1.5-x,1+y,-1/2+z     | 1.5-x,1+y,-1/2+z    | 8.63             | -1.33            | 0.38              | 0.28              |
| M1...M29 | 1+x,1/2+y,-1/2+z     | 1+x,1/2+y,-1/2+z    | 5.28             | 0.02             | 0.23              | 0.00              |
| Total    |                      |                     | 637.78           | -132.60          | 28.00             | 28.00             |

## 2. Normalized Data

Table S55. Normalized contact area (NC) and stabilization energy (NG) data of all 27 salts.

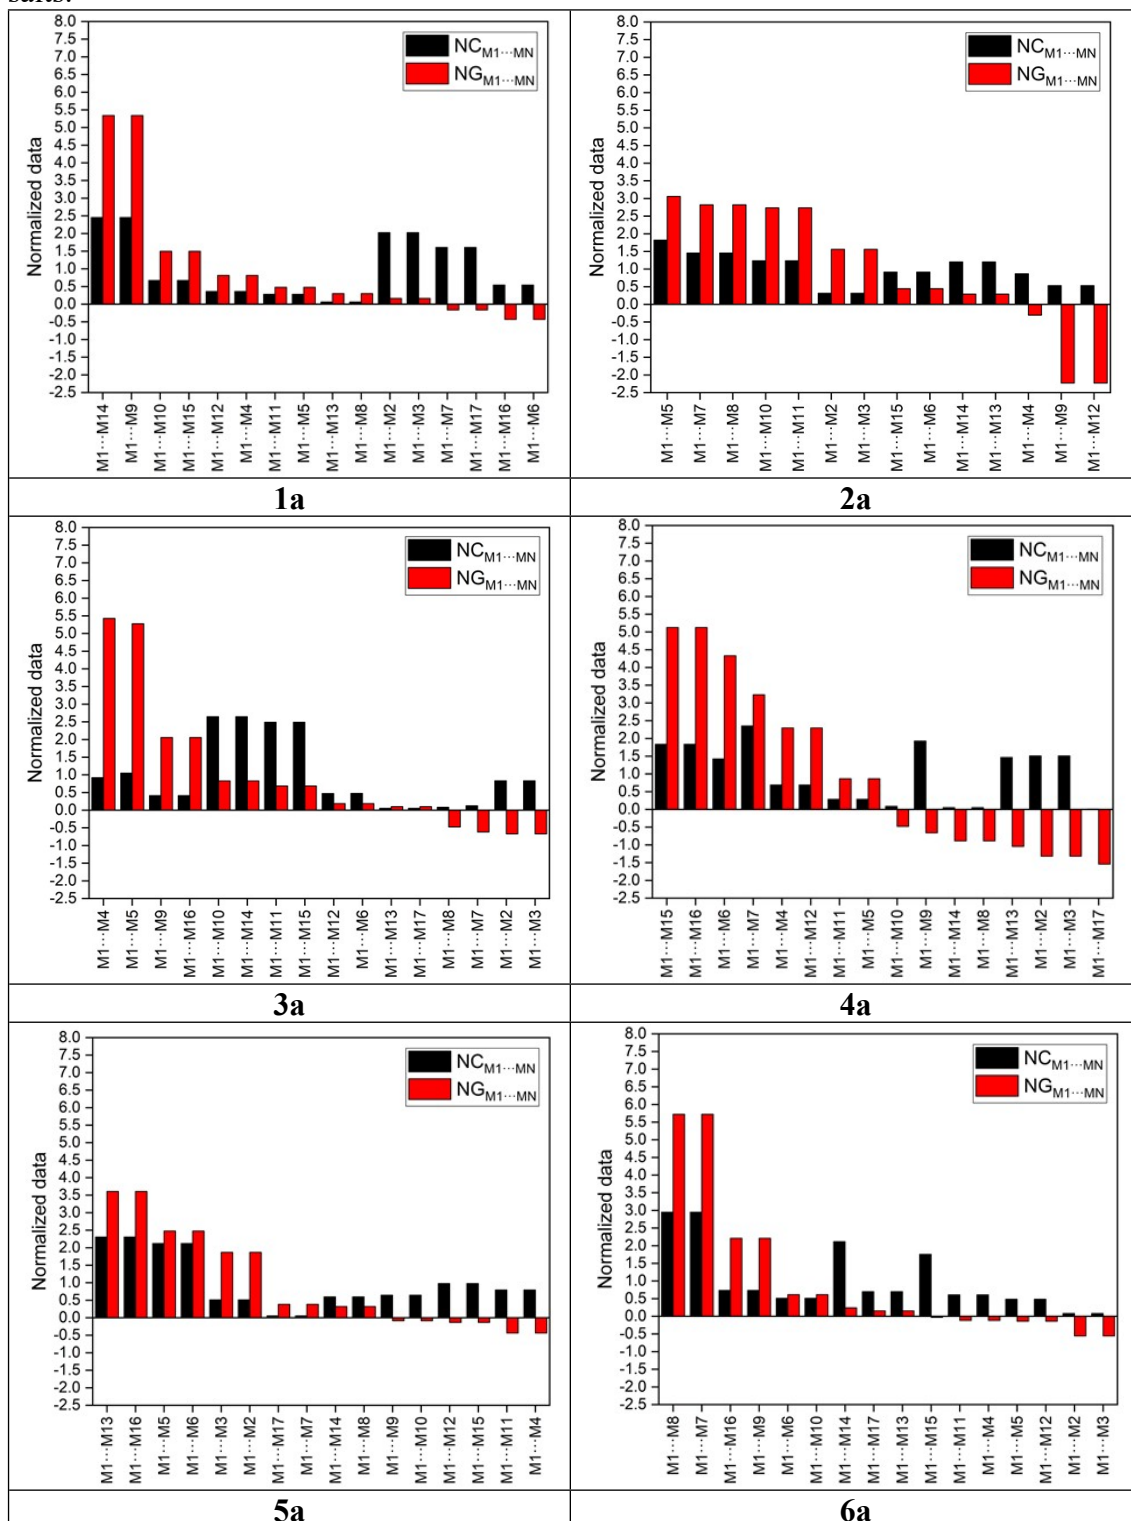



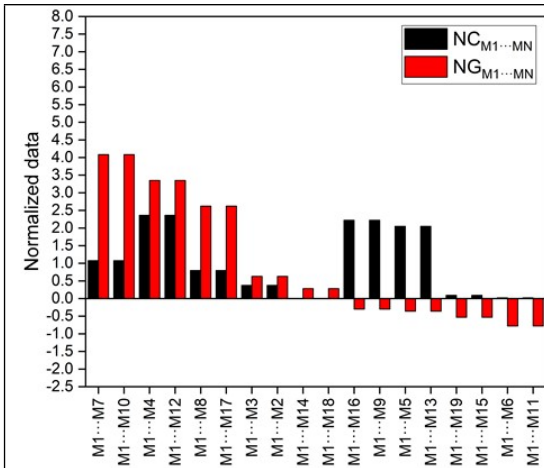

7a

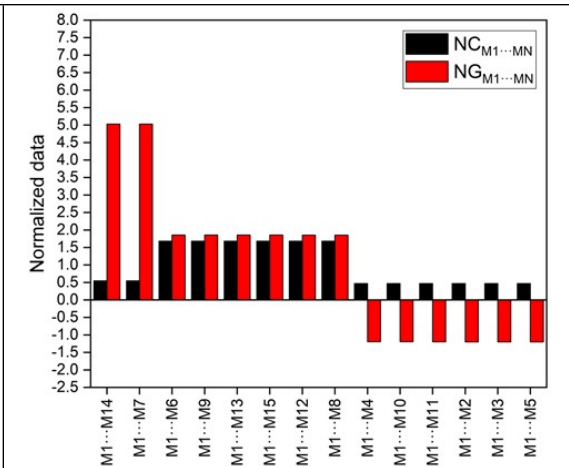

8a

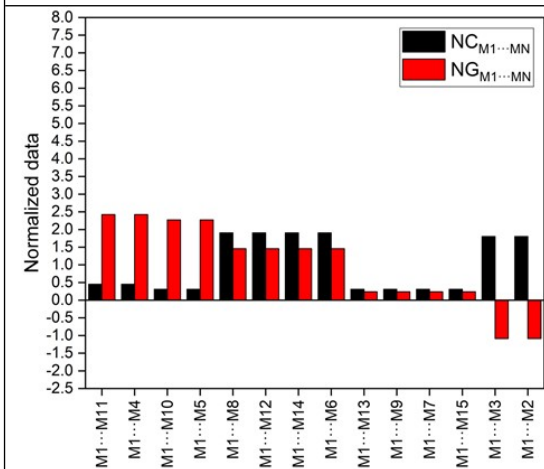

9a

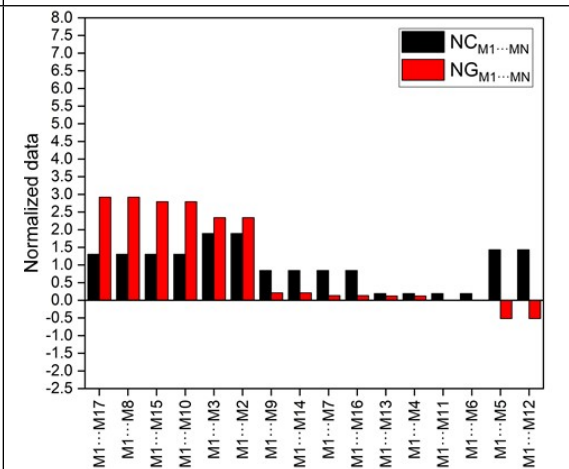

11a

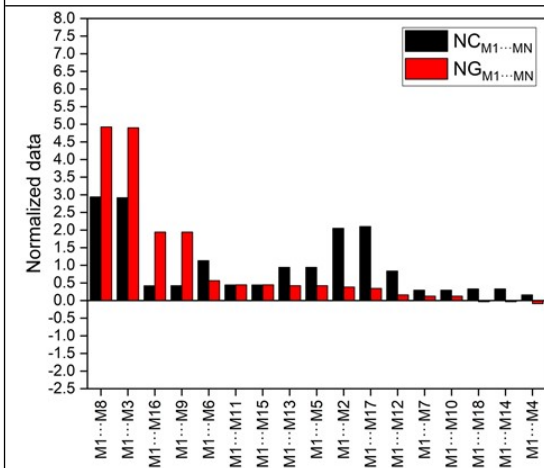

12a

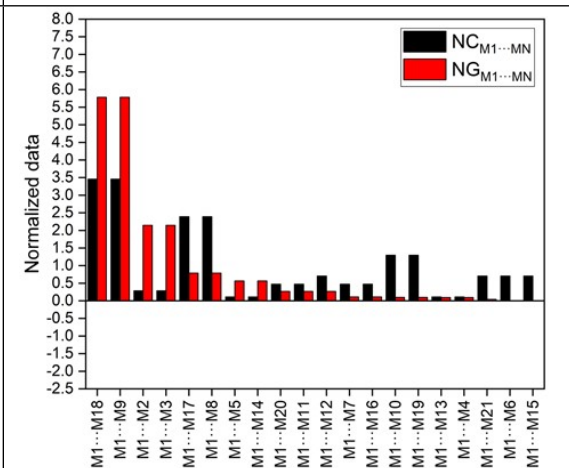

13a

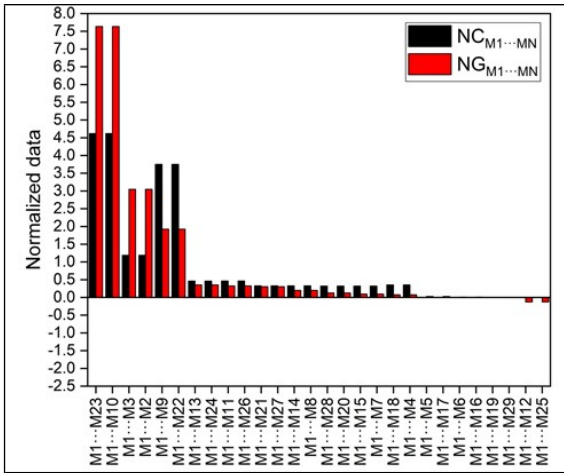

15a

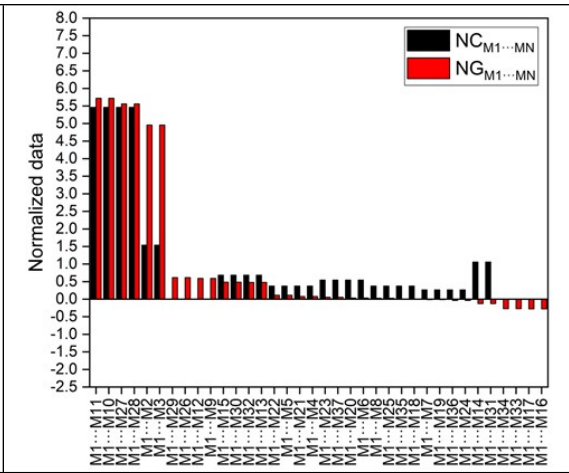

16a

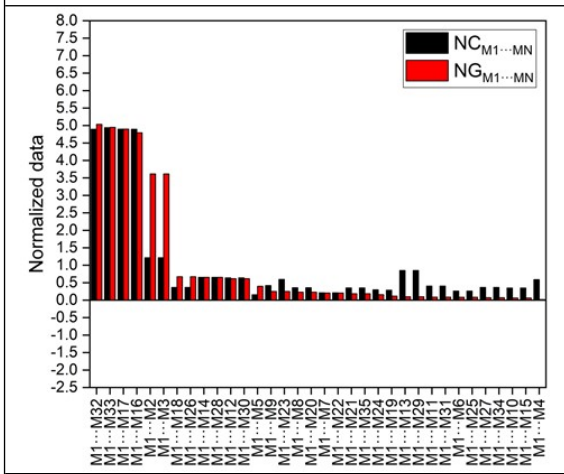

17a

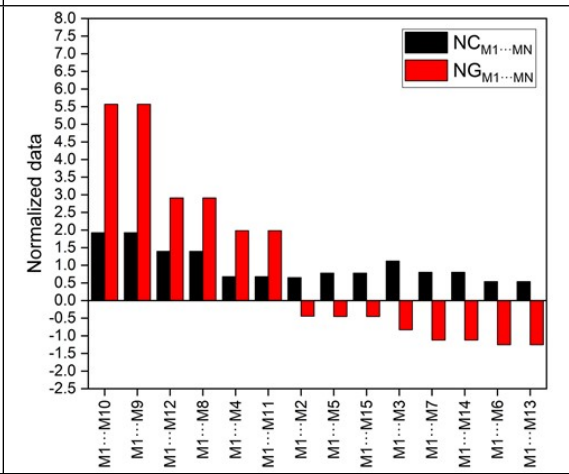

4b

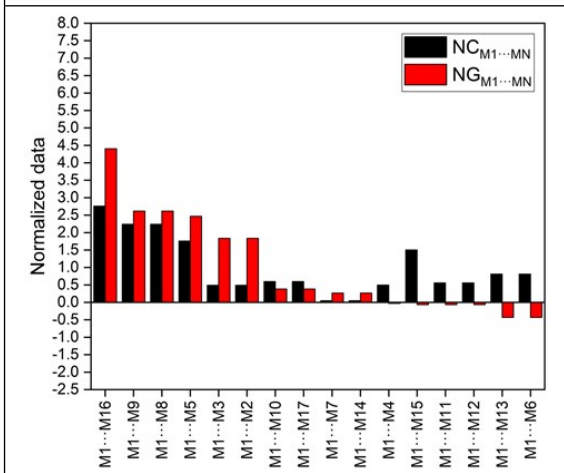

5b

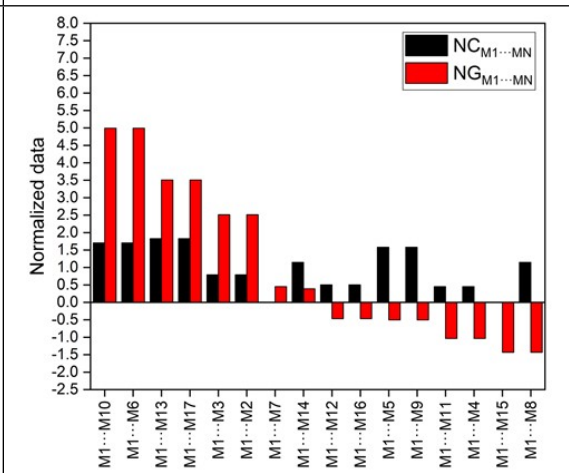

7b

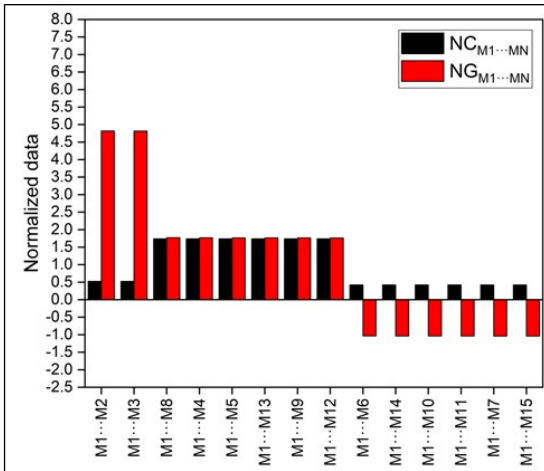

8b

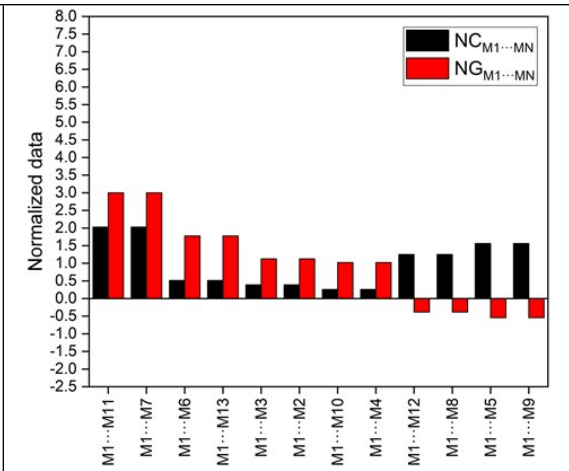

9b

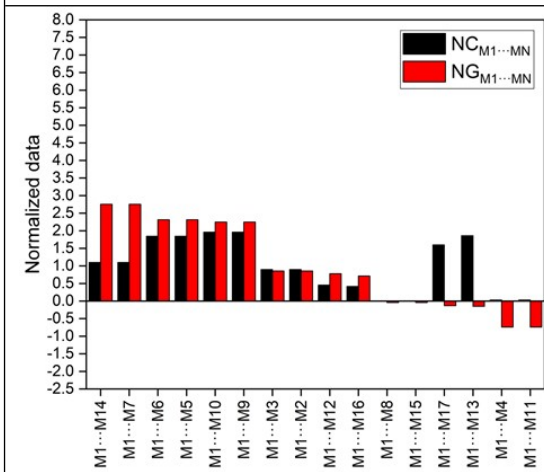

10b

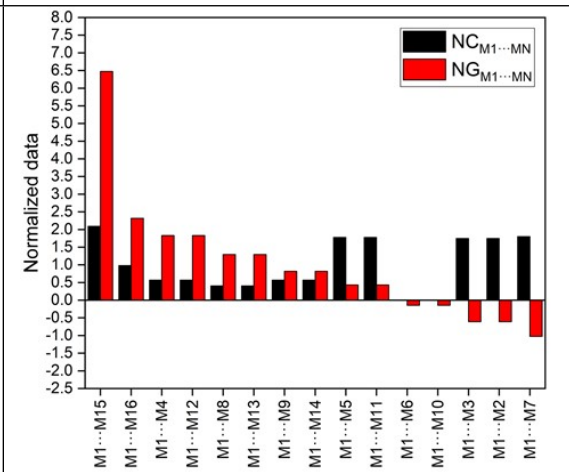

4c

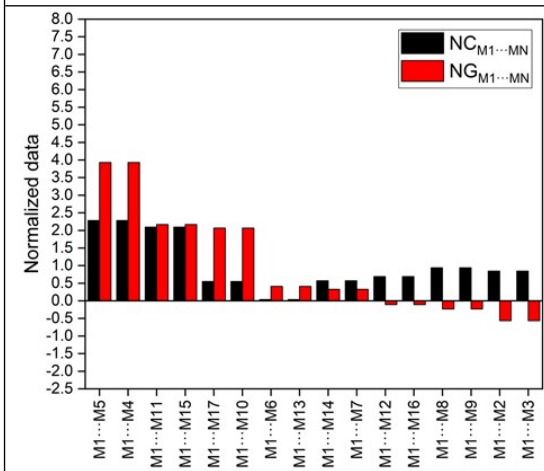

5c

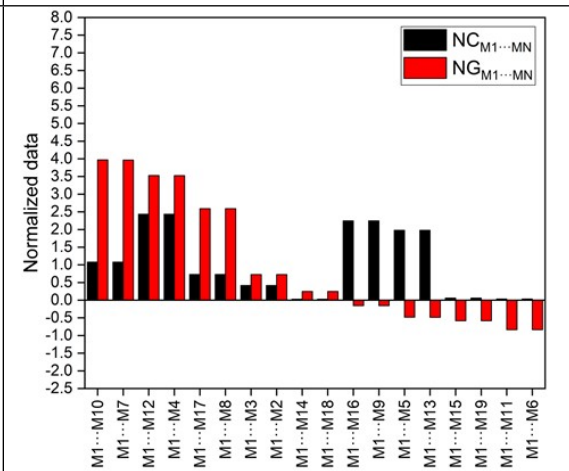

7c

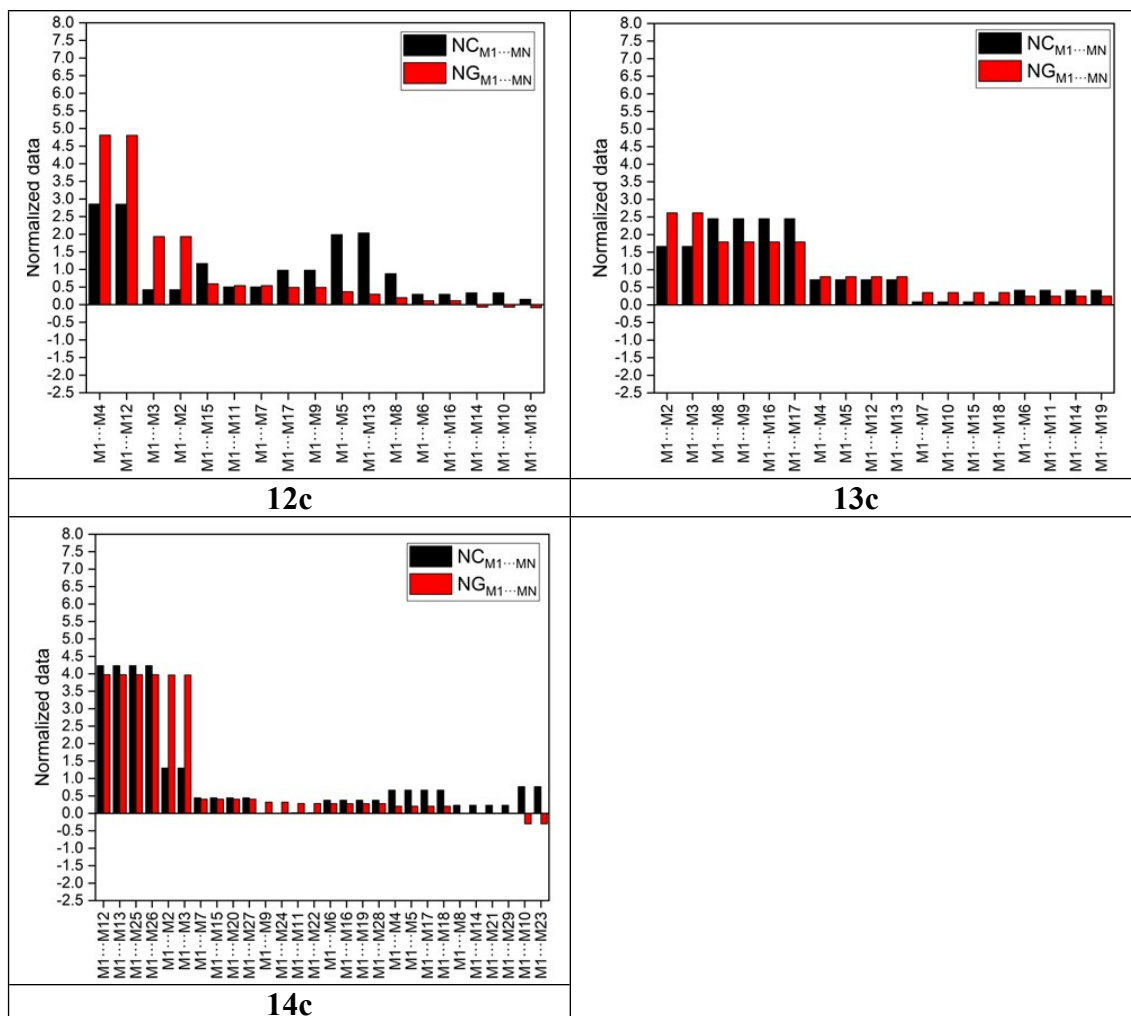

### 3. Molecular Electrostatic Potential (MEP)

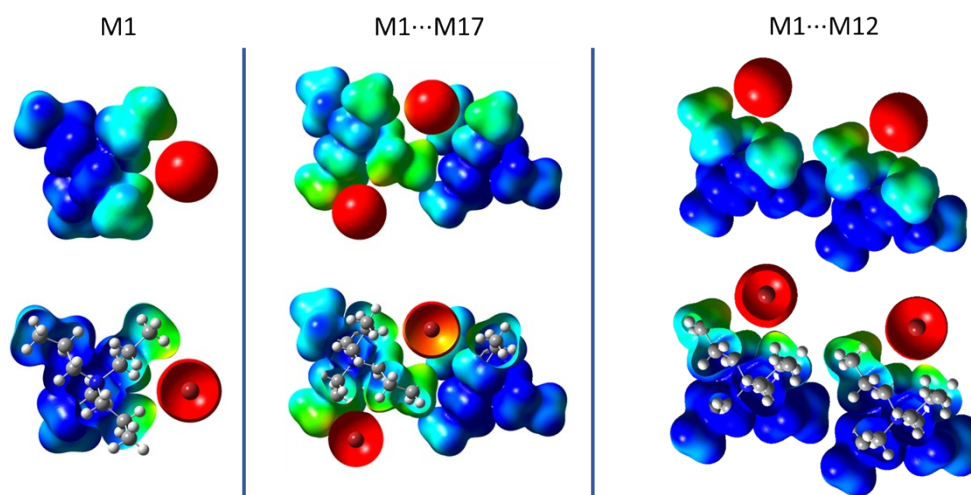

Figure S55. MEPs surfaces of salt **11a**. M1, M1...M17 the most stabilizing dimer and M1...M12 the least stabilizing dimer.

#### 4. Crystallization Mechanisms Proposals

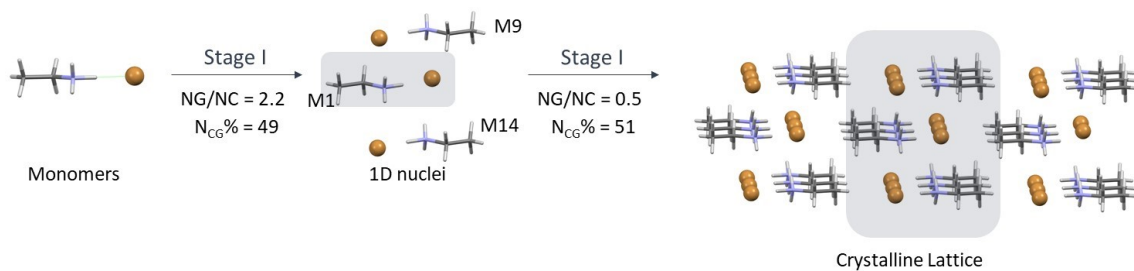

Figure S56. Crystallization mechanism proposal of salt **1a**.

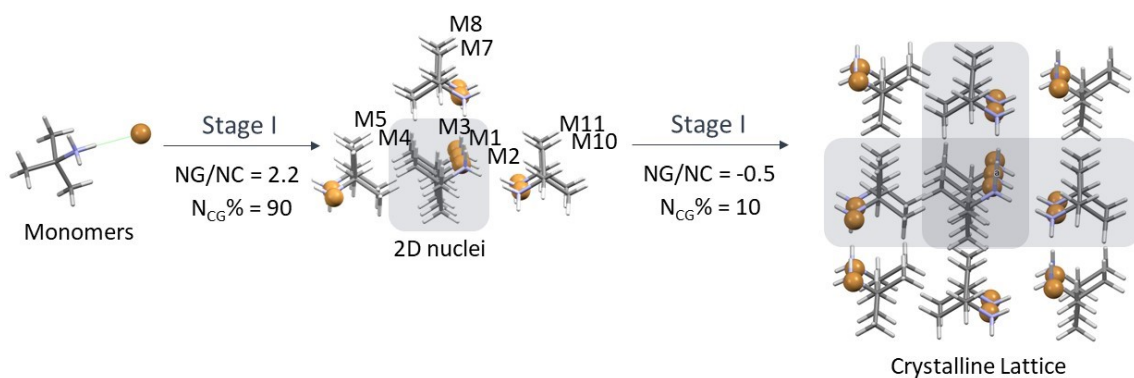

Figure S57. Crystallization mechanism proposal of salt **2a**.

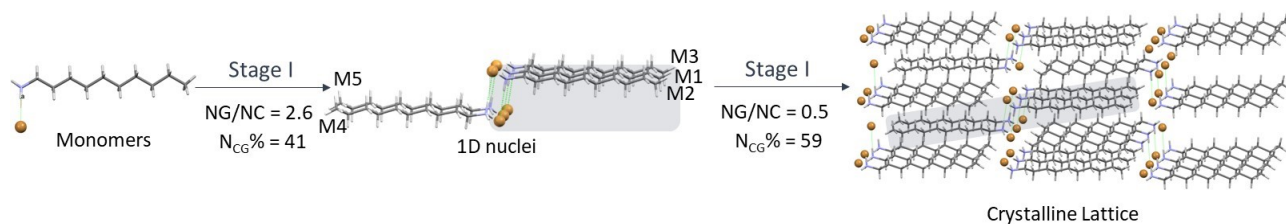

Figure S58. Crystallization mechanism proposal of salt **3a**.

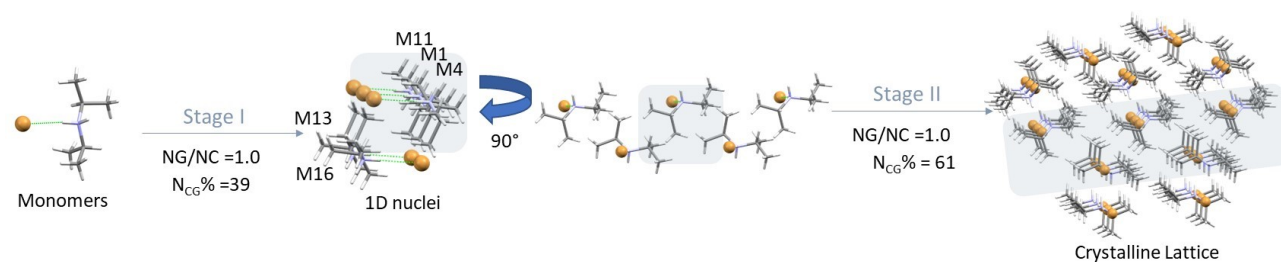

Figure S59. Crystallization mechanism proposal of salt **5a**.

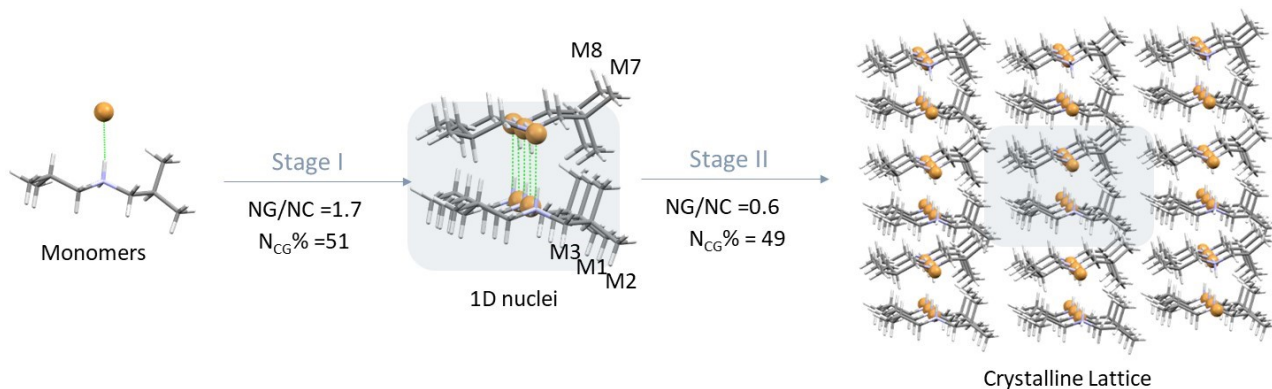

Figure S60. Crystallization mechanism proposal of salt **6a**.

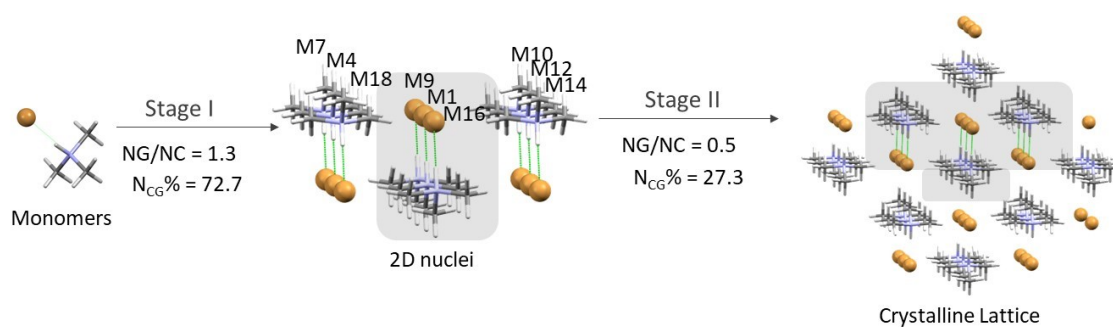

Figure S61. Crystallization mechanism proposal of salt **7a**.

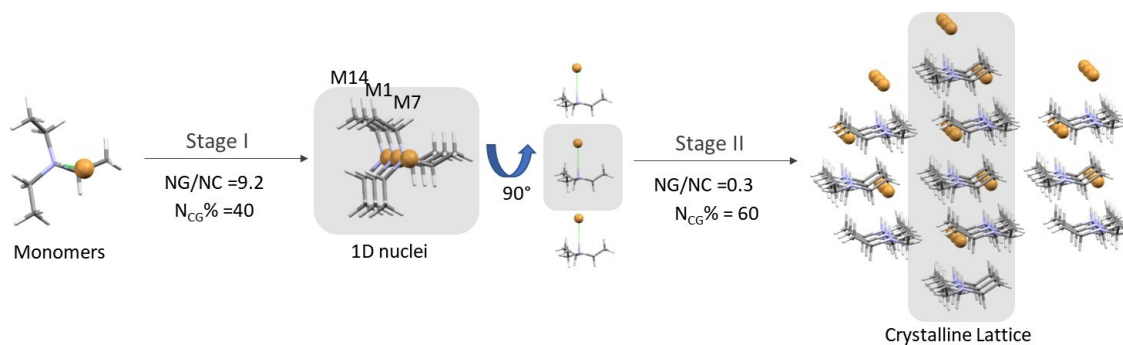

Figure S62 Crystallization mechanism proposal of salt **8a**.

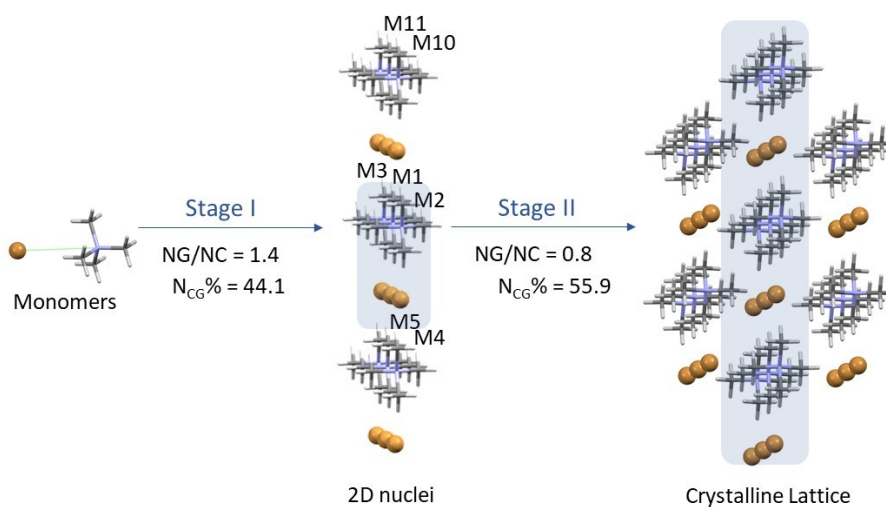

Figure S63. Crystallization mechanism proposal of salt **9a**.

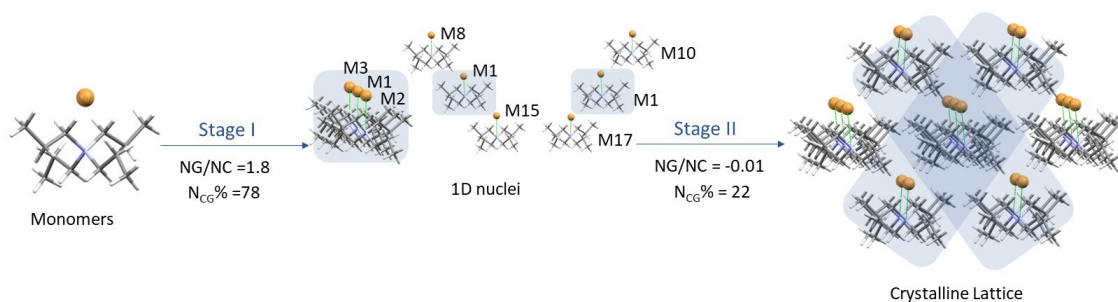

Figure S64. Crystallization mechanism proposal of salt **11a**.

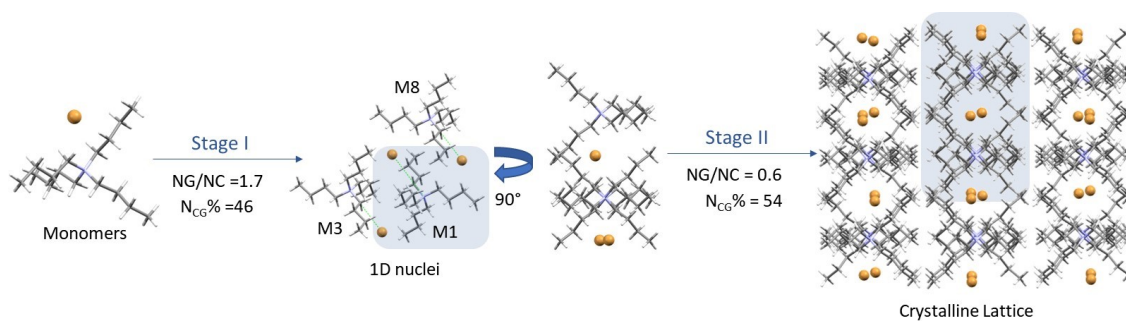

Figure S65. Crystallization mechanism proposal of salt **12a**.

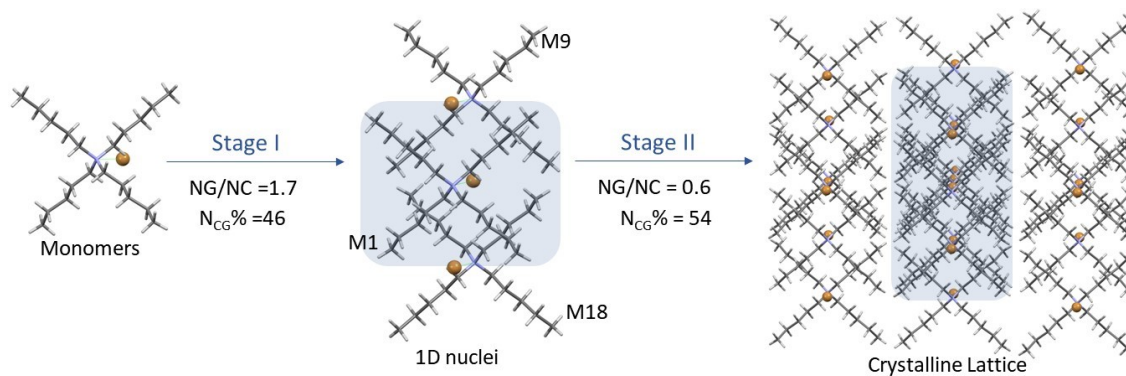

Figure S66. Crystallization mechanism proposal of salt **13a**.

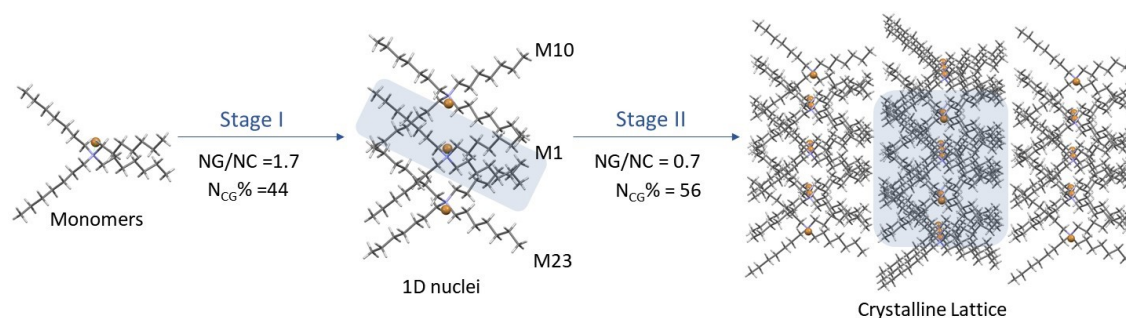

Figure S67. Crystallization mechanism proposal of salt **15a**.

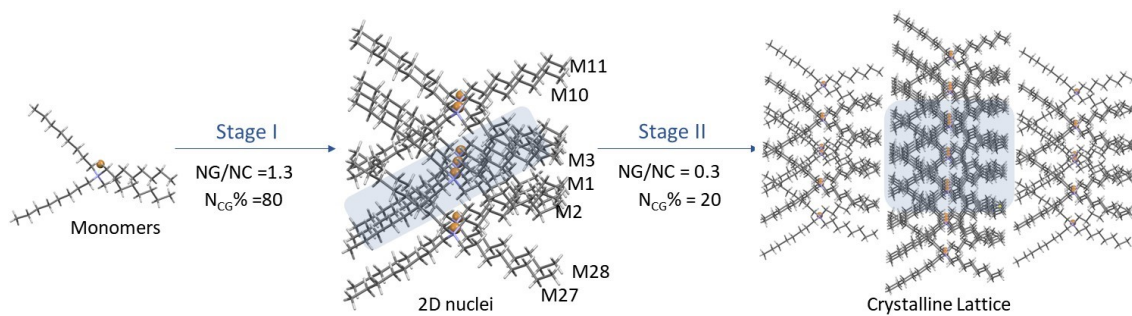

Figure S68. Crystallization mechanism proposal of salt **16a**.

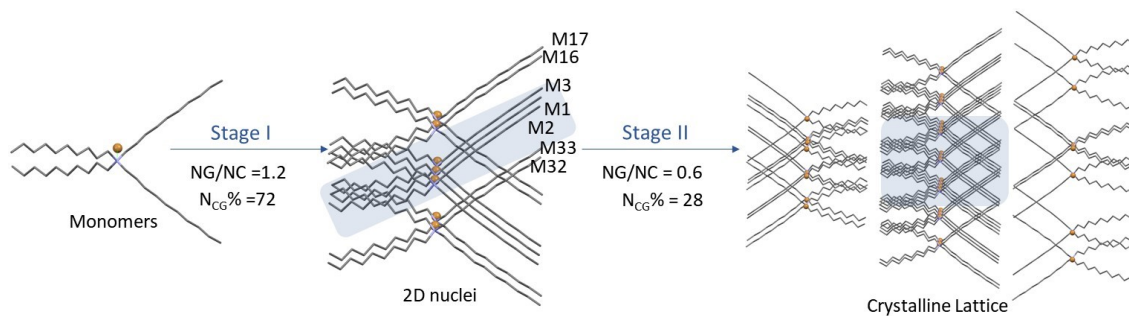

Figure S69. Crystallization mechanism proposal of salt **17a**. Hydrogens were omitted for clarity.

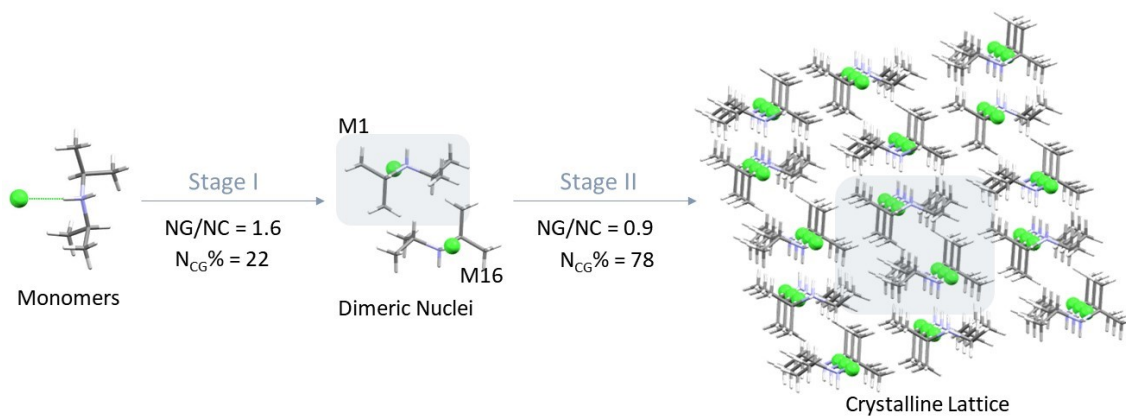

Figure S70. Crystallization mechanism proposal of salt **5b**.

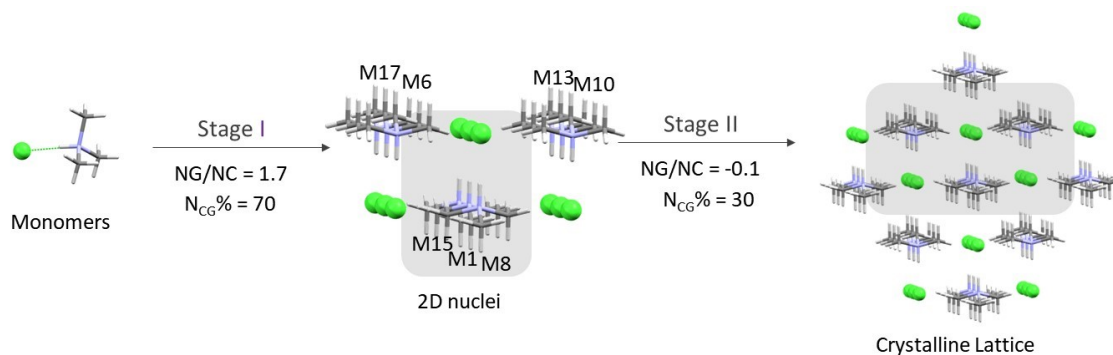

Figure S71. Crystallization mechanism proposal of salt **7b**.



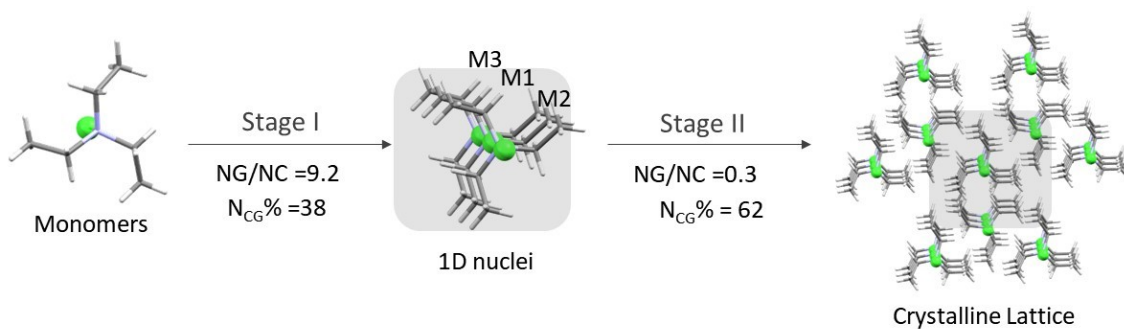

Figure S72. Crystallization mechanism proposal of salt **8b**.

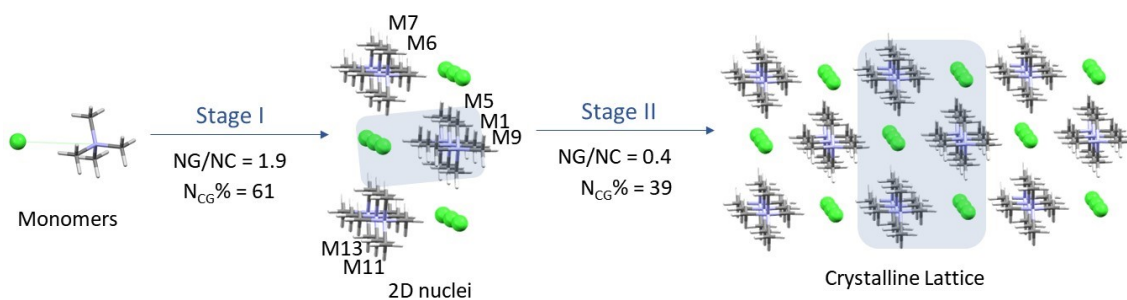

Figure S73. Crystallization mechanism proposal of salt **9b**.

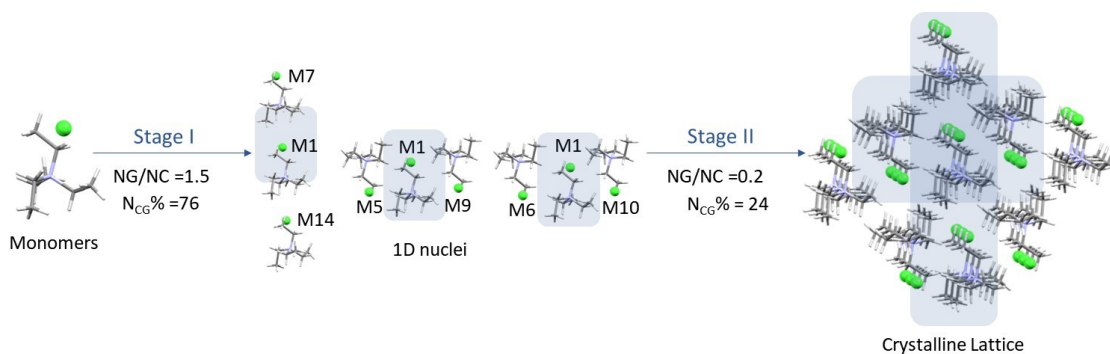

Figure S74. Crystallization mechanism proposal of salt **10b**.

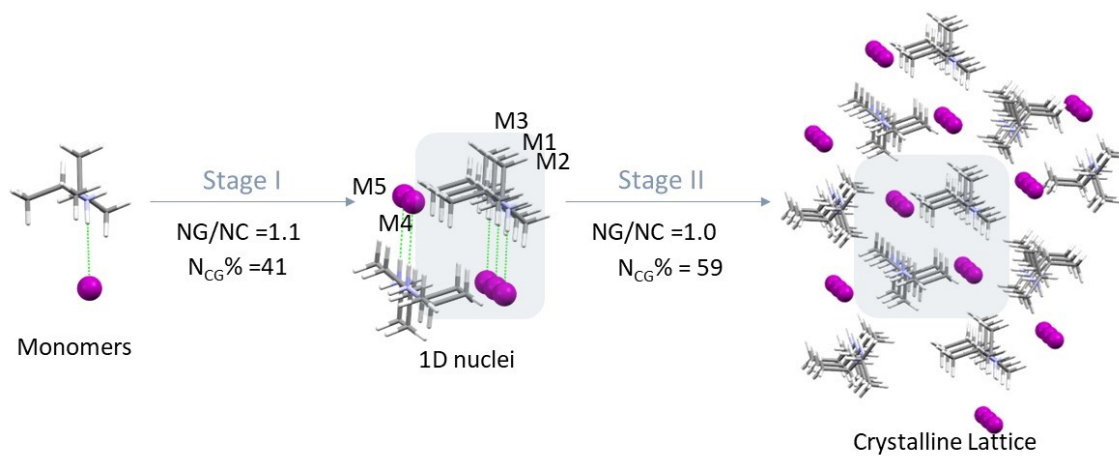

Figure S75. Crystallization mechanism proposal of salt **5c**.

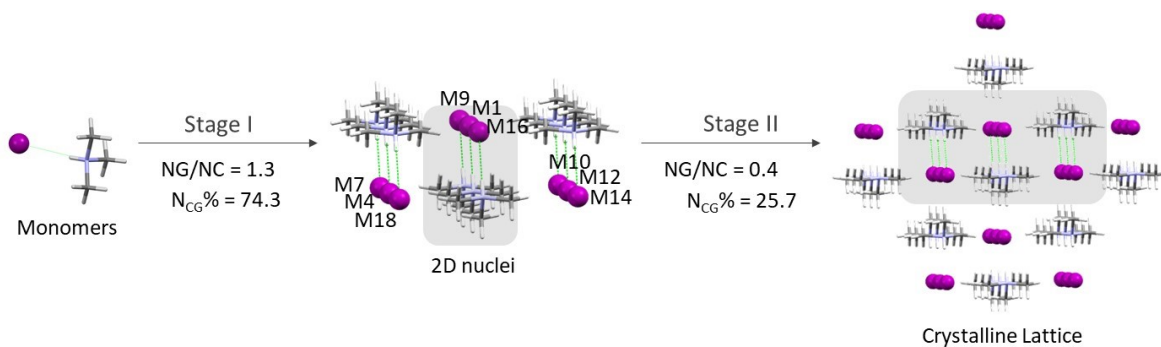

Figure S76. Crystallization mechanism proposal of salt **7c**.

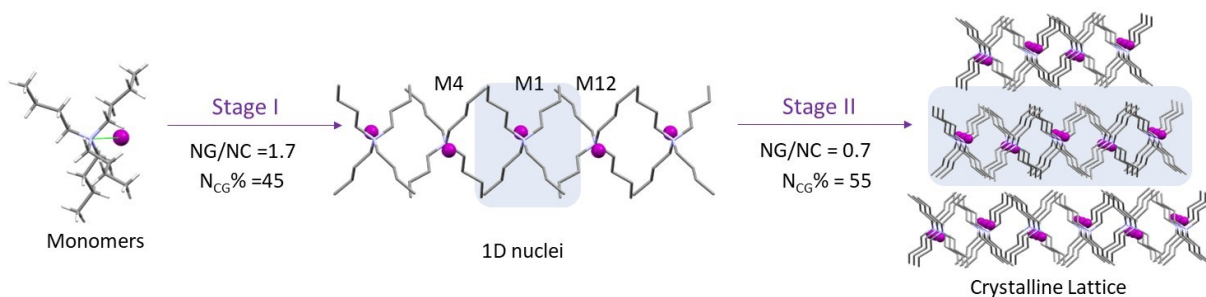

Figure S77. Crystallization mechanism proposal of salt **12c**. Hydrogens were omitted for clarity

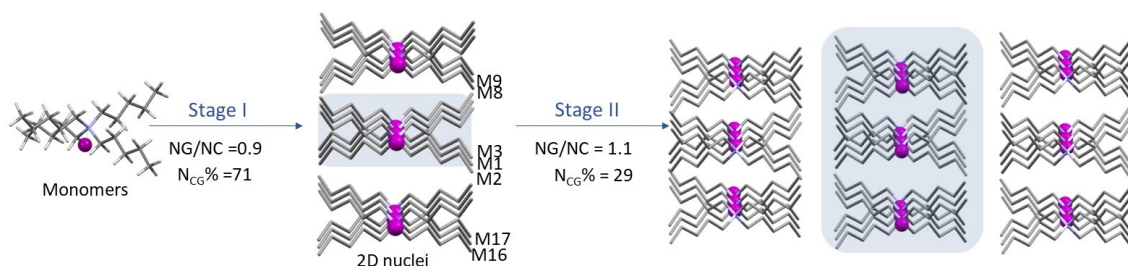

Figure S78. Crystallization mechanism proposal of salt **13c**. Hydrogens were omitted for clarity.

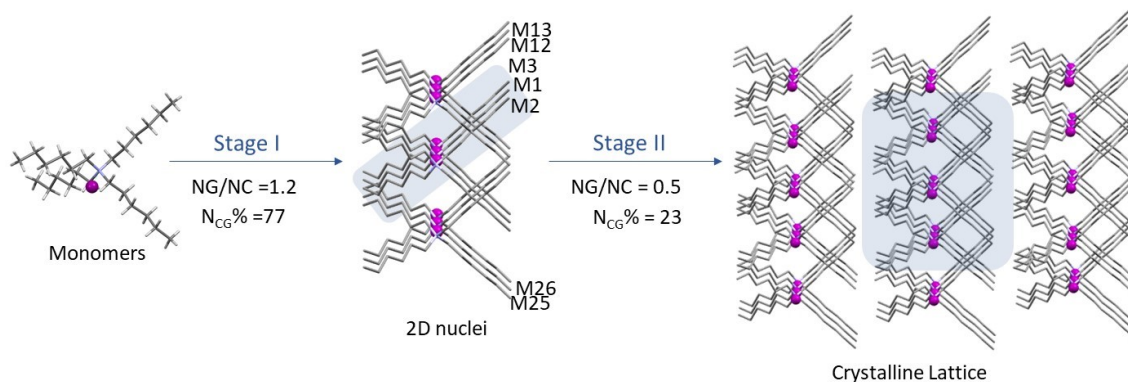

Figure S79. Crystallization mechanism proposal of salt **14c**. Hydrogens were omitted for clarity.

## 5. Basis Set Comparison

Table S56 Energetic data for **4a**, **4b** and **4c** calculated at  $\omega$ b97xd/aug-cc-pvdz and  $\omega$ b97xd/cc-pvdz theory level and basis sets. Pseudopotentials were used for **4c** on both basis sets.

| Salt      | <b>4a</b>                                     |         | <b>4b</b>   |         | <b>4c</b>   |            |
|-----------|-----------------------------------------------|---------|-------------|---------|-------------|------------|
| Dimer     | $G_{M1\dots MN}$<br>(kcal mol <sup>-1</sup> ) |         |             |         |             |            |
| Basis set | aug-cc-pvdz                                   | cc-pvdz | aug-cc-pvdz | cc-pvdz | aug-cc-pvdz | cc-pvdz-pp |
| M1...M2   | 2.89                                          | 3.06    | 7.44        | 8.06    | 3.31        | 4.19       |
| M1...M3   | 5.48                                          | 5.72    | 7.44        | 8.06    | 3.31        | 4.19       |
| M1...M4   | -14.74                                        | -13.65  | -14.84      | -14.03  | -12.78      | -12.58     |
| M1...M5   | 3.06                                          | 3.11    | -6.02       | -5.29   | -3.41       | -2.97      |
| M1...M6   | 8.35                                          | 8.64    | -27.04      | -26.47  | 0.90        | 0.99       |
| M1...M7   | 7.51                                          | 7.73    | -20.38      | -19.76  | 6.63        | 7.04       |
| M1...M8   | -20.55                                        | -20.07  | 5.23        | 5.43    | -9.15       | -8.88      |
| M1...M9   | -37.95                                        | -38.40  | 3.75        | 4.03    | -7.01       | -5.62      |
| M1...M10  | -37.95                                        | -38.40  | 2.86        | 2.91    | 0.90        | 0.99       |
| M1...M11  | -14.74                                        | -13.65  | -6.01       | -5.29   | -3.41       | -2.97      |
| M1...M12  | -20.55                                        | -20.07  | -14.84      | -14.03  | -12.78      | -12.58     |
| M1...M13  | 8.35                                          | 8.64    | 6.01        | 6.37    | -9.15       | -8.88      |
| M1...M14  | 7.51                                          | 7.73    | 5.23        | 5.43    | -7.01       | -5.62      |
| M1...M15  | 3.06                                          | 3.11    | -30.73      | -31.34  | -42.92      | -44.49     |
| M1...M16  | -                                             | -       | -30.73      | -31.34  | -16.35      | -15.91     |
| M1...M17  | -                                             | -       | 7.77        | 9.43    | -           | -          |
| Total     | -100.28                                       | -96.53  | -104.88     | -97.82  | -108.90     | -103.09    |

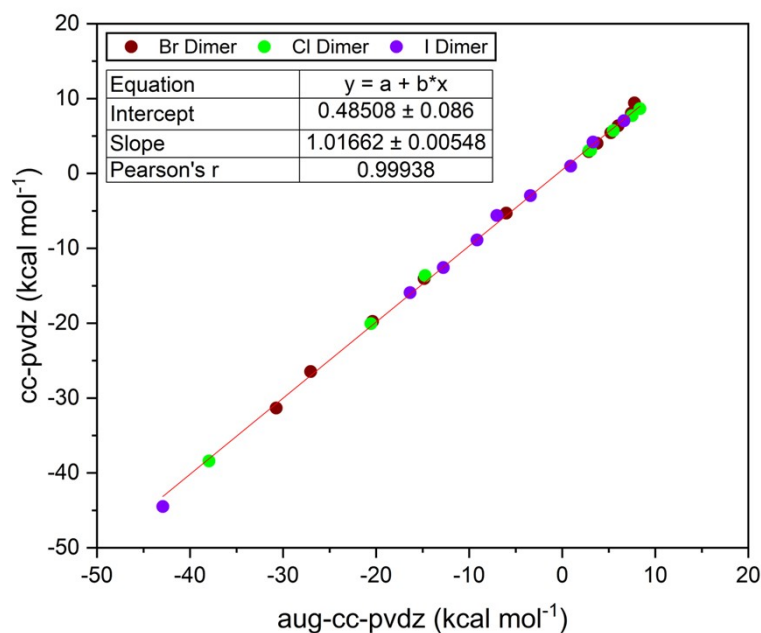

Figure S80. Correlation between raw values of dimer interactions of **4a-c** using both basis sets, aug-cc-pvdz and cc-pvdz. (**4c** energies were calculated using aug-cc-pvdz-pp and cc-pvdz-pp). This correlation considers 45 comparisons of dimer pairs.
